# Supplementary material for: Synthesis of 14-membered enediyne-embedded macrocycles
Source: Royal Society of Chemistry journal article supplement (doi:10.1039/d2ob00090c), 2022-01-01
Supplement: d2ob00090c1.pdf [file d2ob00090c1.pdf]

## Supporting Information File

### Synthesis of 14-membered enediyne-embedded macrocycles

Mladena Glavaš,<sup>1</sup> Matija Gredičak,<sup>1</sup> Zoran Štefanić,<sup>2</sup> Ivanka Jerić<sup>1\*</sup>

<sup>1</sup> Division of Organic Chemistry and Biochemistry, Ruđer Bošković Institute, Bijenička cesta 54, 10000 Zagreb, Croatia

<sup>2</sup> Division of Physical Chemistry, Ruđer Bošković Institute, Bijenička cesta 54, 10000 Zagreb, Croatia

Table of content:

|                                                                                                        |       |
|--------------------------------------------------------------------------------------------------------|-------|
| 1. Synthesis of 5-(2-iodophenyl)pent-4-ynal ( <b>1</b> )                                               | SI-2  |
| 2. Macrocyclization reaction optimization                                                              | SI-3  |
| 3. HPLC analysis of macrocyclization reaction (Fig. SI-1 – SI-8)                                       | SI-4  |
| 4. Evaluation of antiproliferative effect of selected macrocyclic compounds <i>in vitro</i> (Fig SI-9) | SI-8  |
| 5. Stability of compound <b>3m</b> <sup>1</sup> in phosphate buffer (Fig. SI-10 – SI-11)               | SI-12 |
| 6. NMR spectra of acyclic enediynes <b>2</b>                                                           | SI-14 |
| 7. NMR spectra of macrocyclic compounds <b>3</b> and <b>4</b>                                          | SI-32 |
| 8. x-ray data                                                                                          | SI-51 |

## 1. SYNTHESIS OF 5-(2-IODOPHENYL)PENT-4-YNAL (1)

Aldehyde **1** was prepared in two reaction steps:

### (I) Synthesis of 5-(2-iodophenyl)pent-4-yn-1-ol

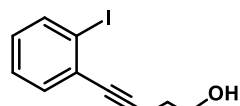

1,2-diodobenzene (2.29 mmol, 300  $\mu$ L) and  $\text{PdCl}_2(\text{PPh}_3)_2$  (3 mol%, 0.069 mmol, 48 mg) were dissolved in triethylamine (3 mL) under argon. After 15 minutes was add  $\text{CuI}$  (3 mol%, 0.069 mmol, 13 mg) and after 5 minutes pent-4-yn-1-ol (2 eq, 4.58 mmol, 425  $\mu$ L). The reaction mixture was stirred for 24h at room temperature and quenched with saturated  $\text{NH}_4\text{Cl}$ . The product was extracted with ethyl-acetate and organic layer was washed with brine and water, dried over  $\text{Na}_2\text{SO}_4$  and concentrated under reduced pressure. The product was obtained by flash column chromatography (petroleum ether/ethyl acetate (v/v = 2/1)).

Yield 44 % (580 mg); brown oil;  $R_f = 0.31$  (petroleum ether/ethyl acetate = 2:1).

$^1\text{H}$  NMR (300 MHz,  $\text{CDCl}_3$ ):  $\delta = 7.81$  (d,  $J = 8.0$  Hz, 1H), 7.44 – 7.35 (m, 1H), 7.30 – 7.22 (m, 1H), 6.98 – 6.93 (m, 1H), 3.89 (t,  $J = 6.1$  Hz, 2H), 2.61 (t,  $J = 6.9$  Hz, 2H), 1.95 – 1.87 (m, 2H), 1.66 (s, 1H);  $^{13}\text{C}$  NMR (75 MHz,  $\text{CDCl}_3$ ):  $\delta = 138.7, 132.6, 130.3, 129.0, 127.9, 101.1, 93.8, 85.6, 61.9, 31.2, 16.2$ .

### (II) Synthesis of 5-(2-iodophenyl)pent-4-ynal (1)

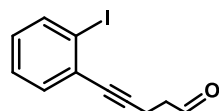

5-(2-iodophenyl)pent-4-yn-1-ol (0.24 mmol, 69 mg) was dissolved in dichlormethane and DMP (2 eq, 0.48 mmol, 204 mg) was add. The reaction mixture was stirred for 2h at room temperature and quenched with aqueous mixture of  $\text{Na}_2\text{S}_2\text{O}_3/\text{NaHCO}_3$ . The product was extracted with dichlormethane and organic layer was washed with brine and water, dried over  $\text{Na}_2\text{SO}_4$  and concentrated under reduced pressure. The product was obtained by flash column chromatography (petroleum ether/ethyl acetate (v/v = 2/1))

Yield 88 % (60 mg); yellow oil;  $R_f = 0.60$  (petroleum ether/ethyl acetate = 2:1).

$^1\text{H}$  NMR (600 MHz,  $\text{CDCl}_3$ ):  $\delta = 9.90$  (s, 1H), 7.82 (d,  $J = 7.9$  Hz, 1H), 7.39 (dd,  $J = 7.7$  Hz,  $J = 1.5$  Hz, 1H), 7.28 – 7.25 (m, 1H), 6.98 – 6.95 (m, 1H), 2.84 – 2.78 (m, 4H);  $^{13}\text{C}$  NMR (151 MHz,  $\text{CDCl}_3$ ):  $\delta = 200.5, 138.8, 132.6, 129.7, 129.2, 127.9, 101.2, 92.1, 83.9, 42.5, 13.1$ .

## 2. MACROCYCLIZATION REACTION OPTIMIZATION

**Table 1.** Optimization of reaction conditions for cyclization of **2a**<sup>a</sup>

| Condensation reagent (eq.) | Base (eq.) | t/°C | Solvent (c/M) | Yield/% <sup>b</sup> |
|----------------------------|------------|------|---------------|----------------------|
| BOP/HOBt (3)               | DIPEA (6)  | RT   | DCM (0.01)    | 12                   |
| BOP/HOBt (3)               | TEA (5)    | RT   | DCM (0.01)    | 12                   |
| BOP/HOBt (3)               | DIPEA (6)  | 40   | DMF (0.01)    | 7                    |
| PyBOP (3)                  | DIPEA (6)  | RT   | DCM (0.01)    | 68                   |
| PyBOP (3)                  | DIPEA (6)  | 40   | DMF (0.01)    | 18                   |

<sup>a</sup> Reactions were carried out on a 0.15 mmol scale; <sup>b</sup> Yields refer to the isolated product.

### 3. HPLC ANALYSIS OF MACROCYCLIZATION REACTION

To elucidate the formation of macrocyclic compound **4g**, rather than expected product **3g** during the macrocyclization of acyclic enediyne **2g**, we followed the reaction by HPLC.

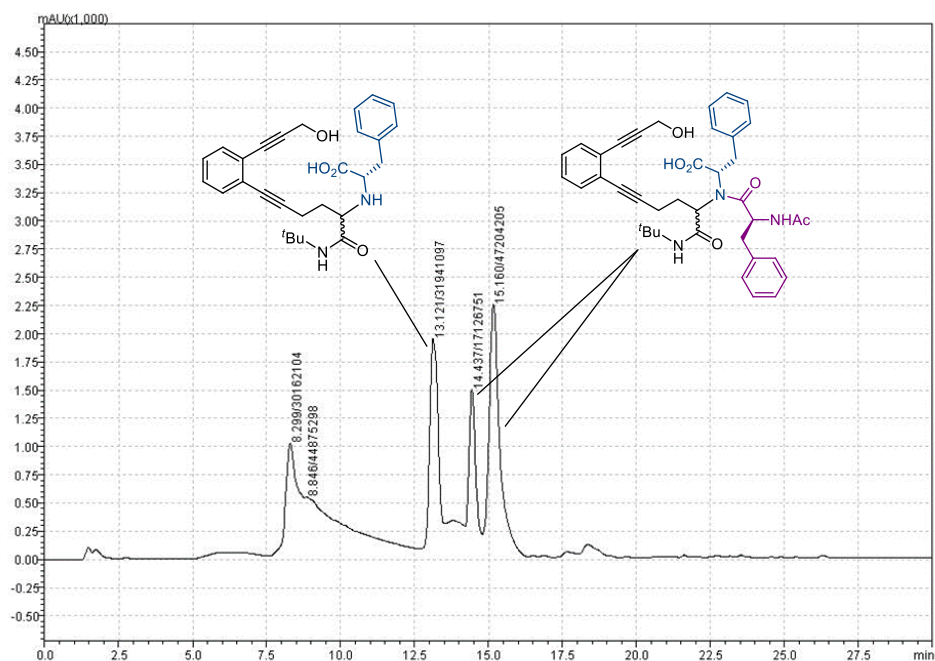

Fig SI-1. HPLC spectrum of deprotected **2g** before macrocyclization reaction. Chromatogram indicate presence of acyclic enediyne with hydrolyzed tertiary amide bond along with non-hydrolyzed ones.

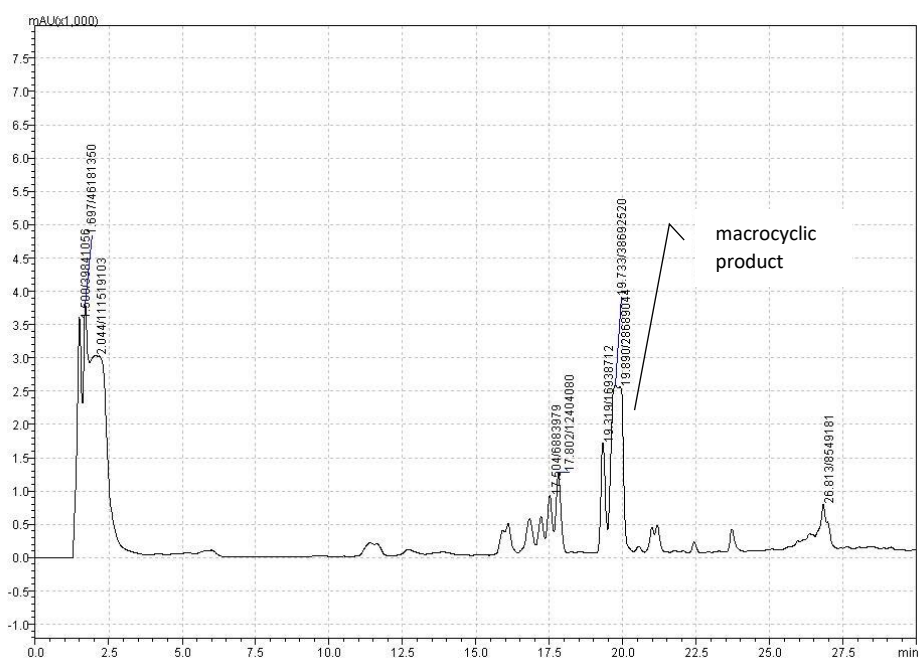

Fig SI-2. HPLC spectrum of deprotected **2g** during macrocyclization reaction (after 20h). Chromatogram show disappearance of **2g** and predominant formation of single macrocyclic product.

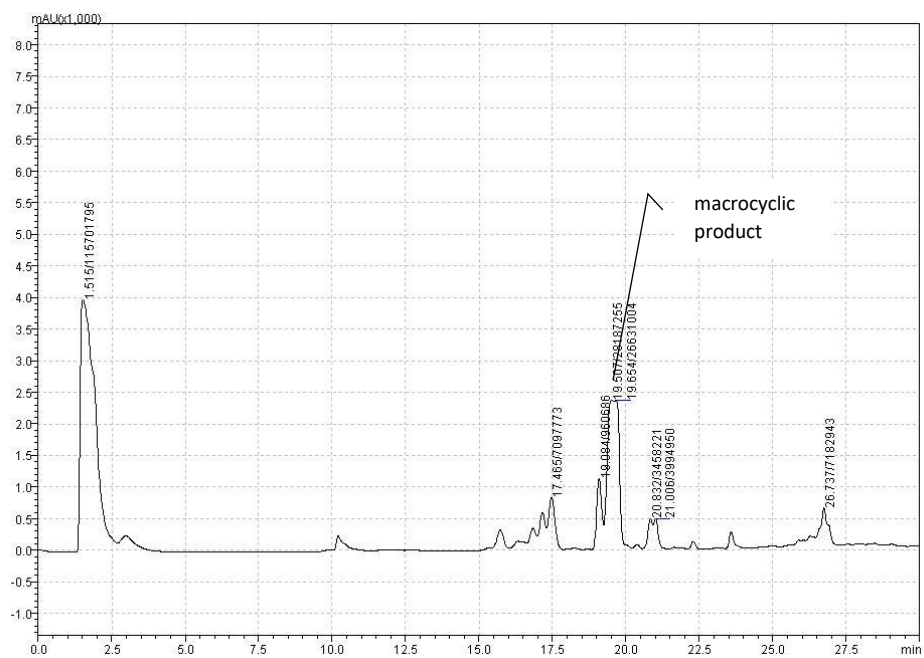

Fig. SI-3. HPLC spectrum of deprotected **2g** during macrocyclization reaction (after 40h).

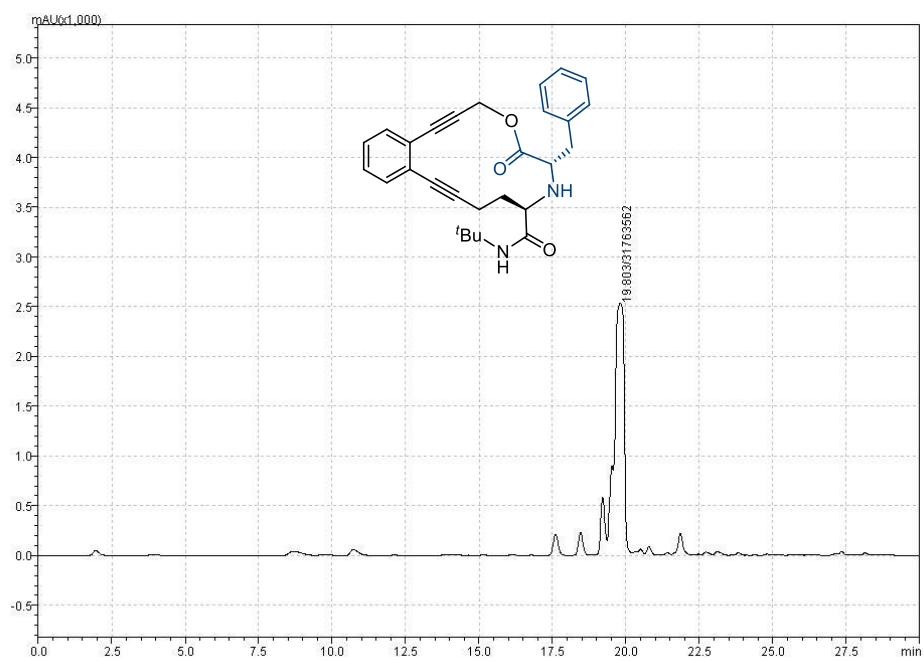

Fig. SI-4. HPLC spectrum of isolated **4g<sup>1</sup>**

Then we performed analysis on the formation of **3a**, where two diastereoisomers of expected macrocycle **3a** have been isolated.

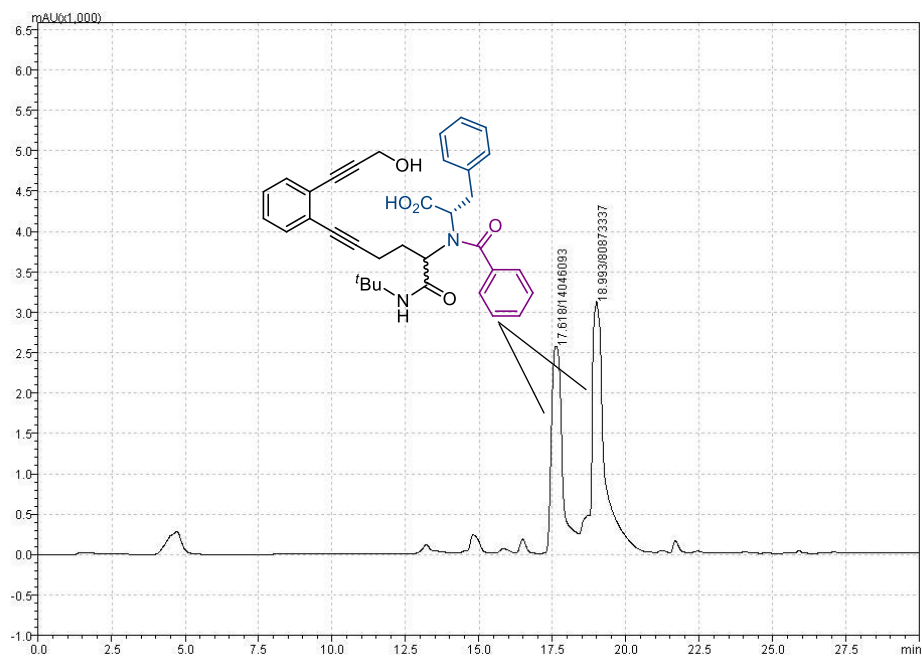

Fig SI-5. HPLC spectrum of deprotected **2a** before macrocyclization reaction.

Chromatogram shows presence of two diastereoisomers of deprotected **2a**.

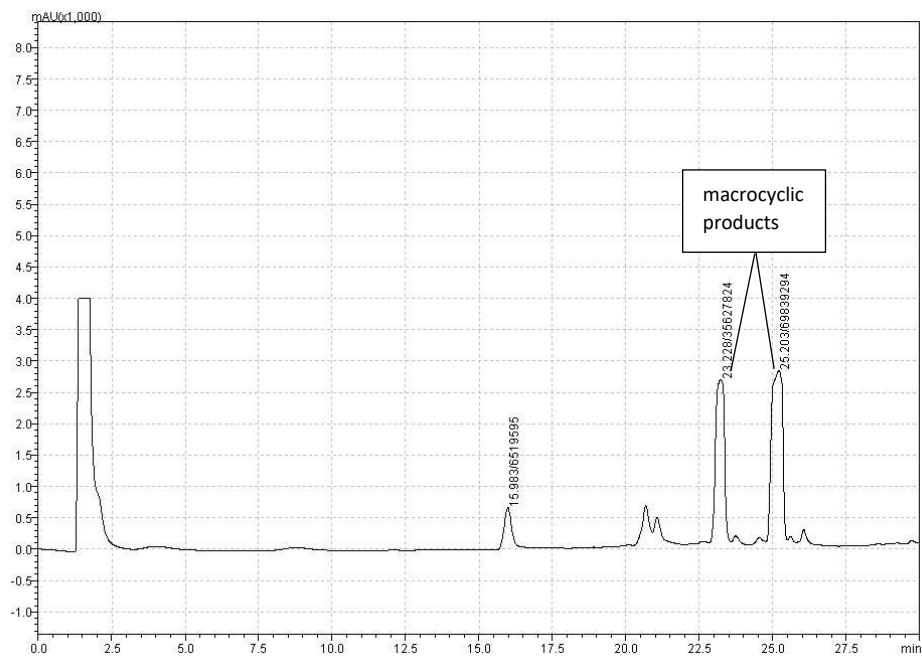

Fig. SI-6. HPLC spectrum of deprotected **2a** during macrocyclization reaction (after 20h).

Chromatogram shows disappearance of deprotected **2a** and formation of two diastereoisomers of macrocycle **3a**.

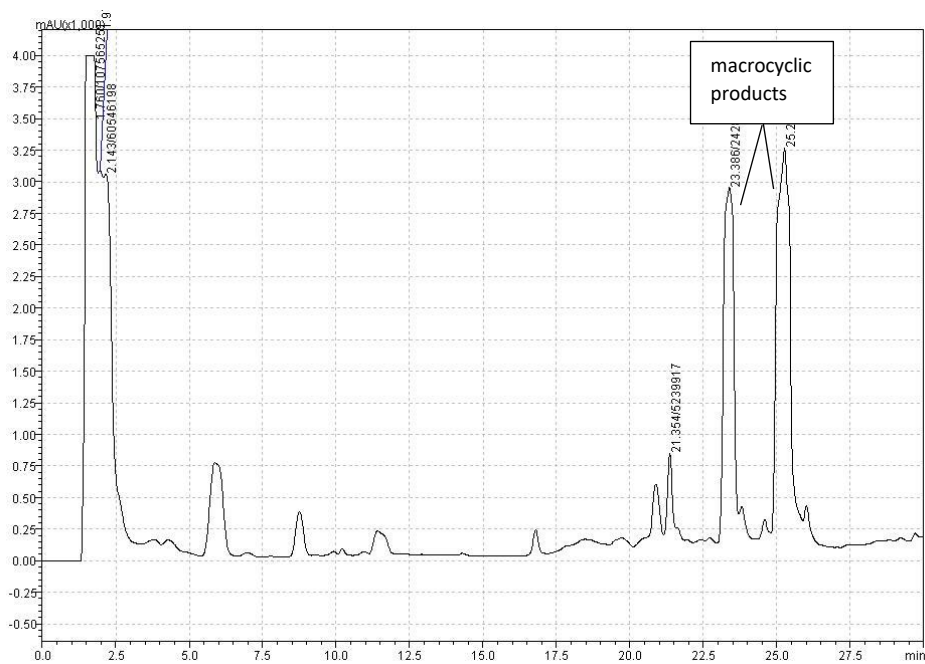

Fig. SI-7. HPLC spectrum of deprotected **2a** during macrocyclization reaction (after 40h).

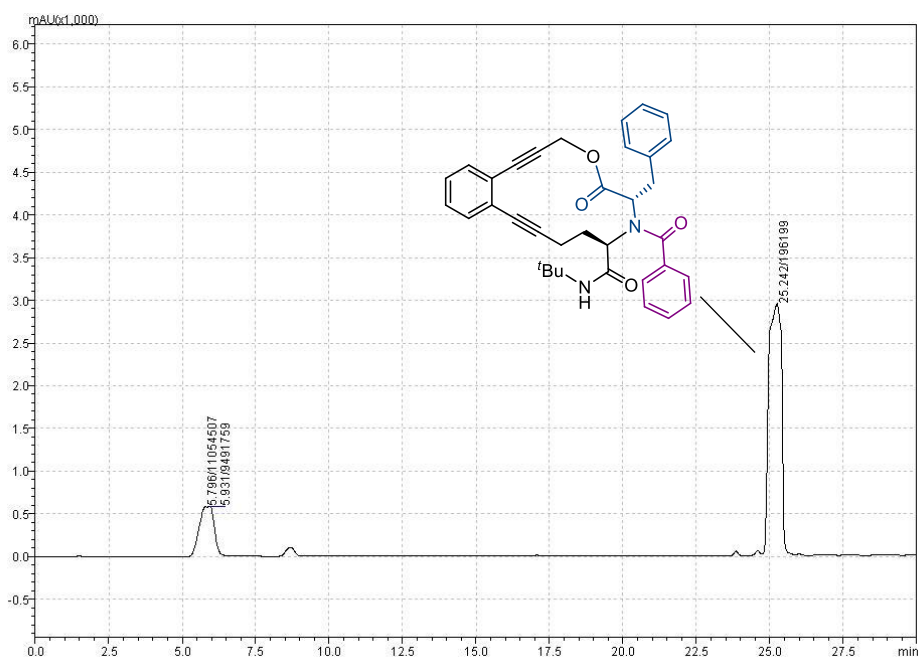

Fig. SI-8. HPLC spectrum of isolated **3a<sup>1</sup>**

HPLC analysis was performed on Zorbax RF XDB-C18 column (3,5  $\mu\text{m}$ , 4,6 x 75 mm). Solvents for the analysis were 0.1% acetic acid in water (solvent A) and methanol (solvent B). The gradient was applied as follows: 0-5 min, 50 % B/50 % A, 5-25 min, 70 % B/30 % A, 25-27 min, 100% B; 27-27,1 min, 50 % B/50 % A; 27,1-30 min, 50 % B/50 % A. The flow rate was 0.5 mL/ min. UV detection was performed at 254 nm and 280 nm.

#### 4. EVALUATION OF ANTIPROLIFERATIVE EFFECT OF SELECTED MACROCYCLIC COMPOUNDS *IN VITRO*

This study has been conducted in the Laboratory of Experimental Therapy, Ruđer Bošković Institute. The purpose of this study was to investigate the effects of several compounds on proliferation of different human cell lines. The experiments were carried out on 2 human cell lines: HCT116 (colon carcinoma) and HEK293T (embryonic kidney). The following macrocyclic compounds have been tested.

| Compound              | Stock Solution/ Solvent   | Additional information                               |
|-----------------------|---------------------------|------------------------------------------------------|
| <b>3e<sup>1</sup></b> | 4×10 <sup>-2</sup> M/DMSO | Precipitated in medium at max. tested concentration. |
| <b>4g<sup>1</sup></b> | 4×10 <sup>-2</sup> M/DMSO | Precipitated in medium at max. tested concentration. |
| <b>3h<sup>1</sup></b> | 4×10 <sup>-2</sup> M/DMSO | Precipitated in medium at max. tested concentration. |
| <b>3i</b>             | 4×10 <sup>-2</sup> M/DMSO | Precipitated in medium at max. tested concentration. |
| <b>3m<sup>1</sup></b> | 4×10 <sup>-2</sup> M/DMSO | Precipitated in medium at max. tested concentration. |

#### Cell culturing

HCT116 and HEK 293T cells were cultured as monolayers and maintained in Dulbecco's modified Eagle medium (DMEM), supplemented with 10% fetal bovine serum (FBS), 2 mM L<sup>-1</sup>glutamine, 100 U/ml penicillin and 100 µg/ml streptomycin in a humidified atmosphere with 5% CO<sub>2</sub> at 37°C.

#### Proliferation assays<sup>1</sup>

The panel cell lines were inoculated onto a series of standard 96-well microtiter plates on day 0, at 1.5×10<sup>4</sup> cells/ml, depending on the doubling times of specific cell line. Test agents were then added in five 10-fold dilutions (10<sup>-8</sup> to 10<sup>-4</sup> M) and incubated for a further 72 hours. Working dilutions were freshly prepared on the day of testing.

After 72 hours of incubation the cell growth rate was evaluated by performing the MTT assay, which detects dehydrogenase activity in viable cells. The MTT Cell Proliferation Assay is a colorimetric assay system, which measures the reduction of a tetrazolium component (MTT) into an insoluble formazan product by the mitochondria of viable cells. For this purpose the substance treated medium was discarded and MTT was added to each well at a concentration of 20 µg / 40 µl. After four hours of



incubation the precipitates were dissolved in 160  $\mu$ l of dymethyl-sulphoxide (DMSO). The absorbance (OD, optical density) was measured on a microplate reader at 570 nm. The absorbance is directly proportional to the cell viability. The percentage of growth (PG) of the cell lines was calculated according to one or the other of the following two expressions:

If  $(\text{mean OD}_{\text{test}} - \text{mean OD}_{\text{tzero}}) \geq 0$  then

$$\text{PG} = 100 \times (\text{mean OD}_{\text{test}} - \text{mean OD}_{\text{tzero}}) / (\text{mean OD}_{\text{ctrl}} - \text{mean OD}_{\text{tzero}}).$$

If  $(\text{mean OD}_{\text{test}} - \text{mean OD}_{\text{tzero}}) < 0$  then:

$$\text{PG} = 100 \times (\text{mean OD}_{\text{test}} - \text{mean OD}_{\text{tzero}}) / \text{OD}_{\text{tzero}}.$$

Where:

Mean  $\text{OD}_{\text{tzero}}$  = the average of optical density measurements before exposure of cells to the test compound.

Mean  $\text{OD}_{\text{test}}$  = the average of optical density measurements after the desired period of time.

Mean  $\text{OD}_{\text{ctrl}}$  = the average of optical density measurements after the desired period of time with no exposure of cells to the test compound.

Each test point was performed in quadruplicate in three individual experiments. The results were expressed as  $\text{GI}_{50}$ , a concentration necessary for 50% of inhibition. Each result is a mean value from at least two separate experiments.

### **$\text{GI}_{50}$ calculations**

The  $\text{GI}_{50}$  measures the growth inhibitory power of the test agent and represents the concentration that causes 50% growth inhibition. The  $\text{GI}_{50}$  values for each compound are calculated from dose-response curves using linear regression analysis by fitting the test concentrations that give PG values above and below the respective reference value (e.g. 50 for  $\text{GI}_{50}$ ). Therefore, a "real" value for any of the response parameters is obtained only if at least one of the tested drug concentrations falls above, and likewise at least one falls below the respective reference value. If however, for a given cell line all of the tested concentrations produce PGs exceeding the respective reference level of effect (e.g. PG value of 50), then the highest tested concentration is assigned as the default value. In the screening data report, that default value is preceded by a ">" sign.

### 3) Results

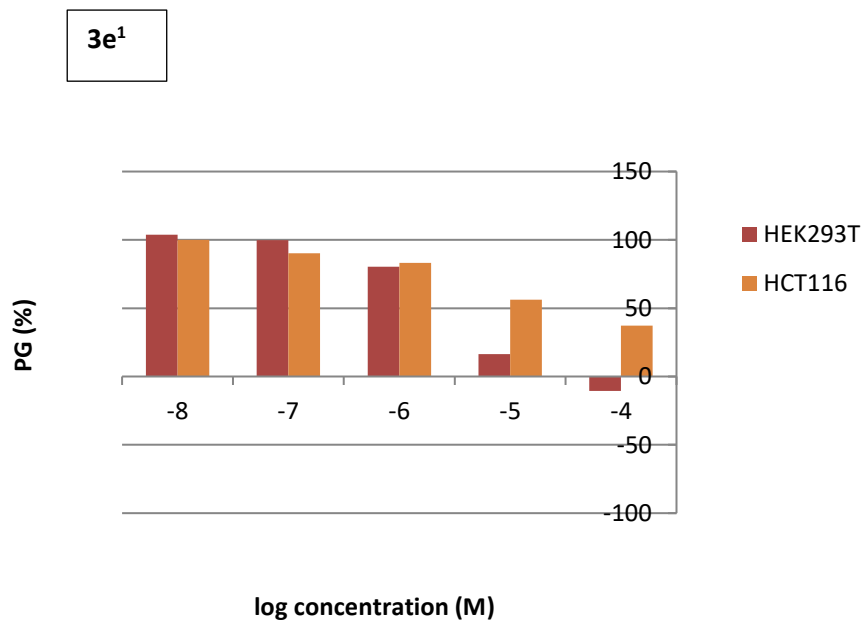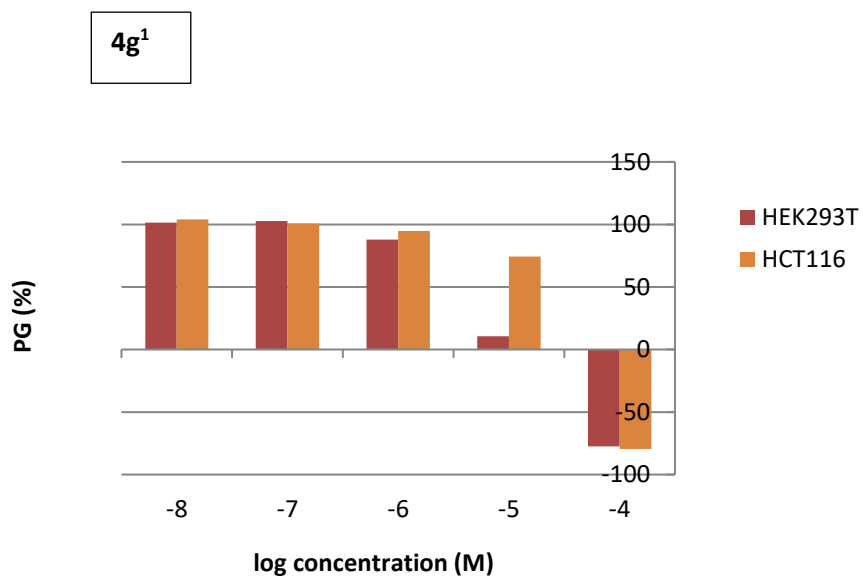

3h<sup>1</sup>

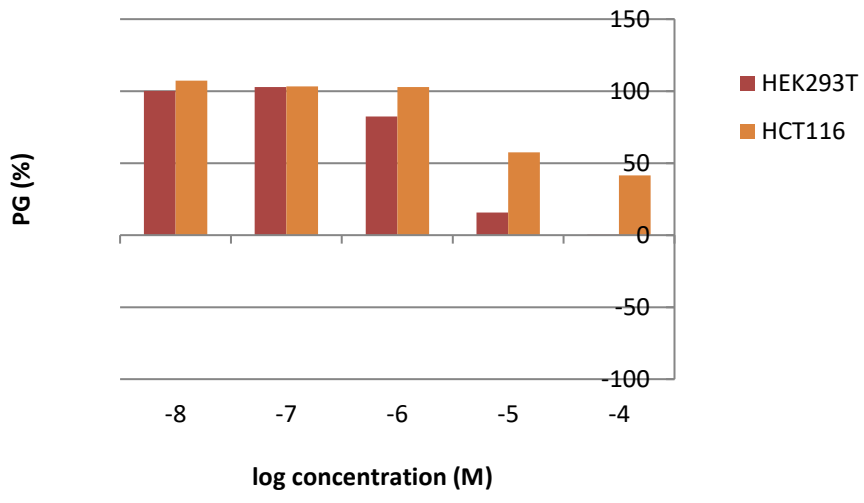

3i

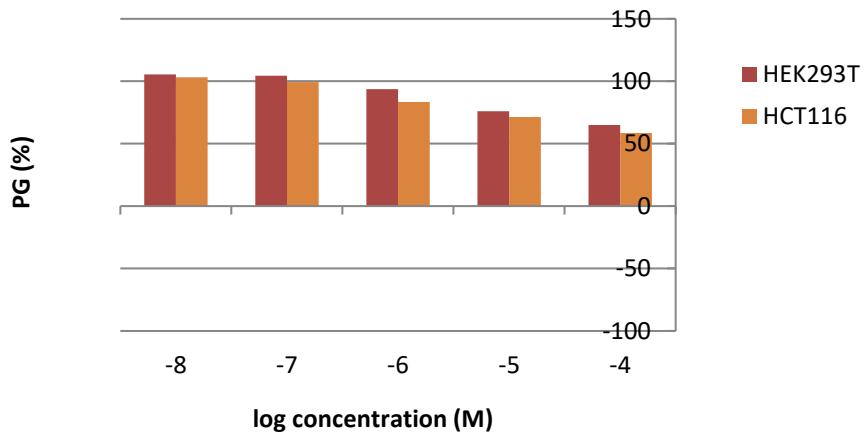

3m<sup>1</sup>

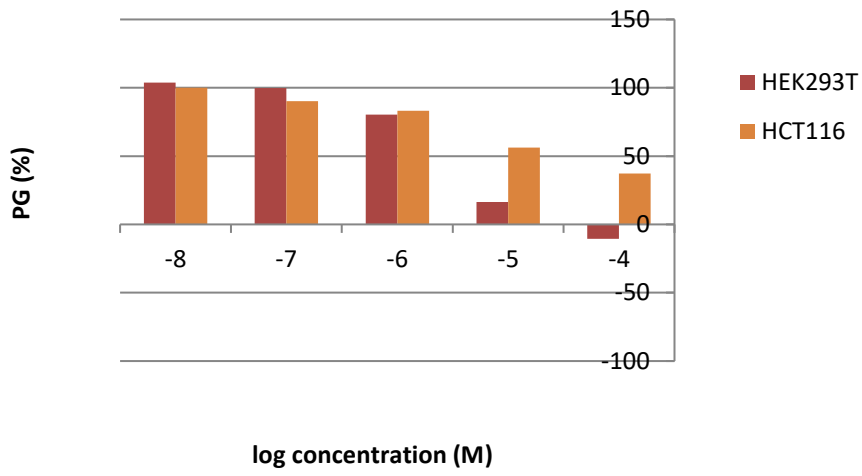

Figure SI-9. Dose-response profiles for selected macrocycles tested *in vitro* on HCT116 and HEK293T cell lines.

## 5. STABILITY OF COMPOUND **3m**<sup>1</sup> IN PHOSPHATE BUFFER

Compound **3m**<sup>1</sup> (5 mg) was dissolved in DMSO (150  $\mu$ L) and was added phosphate buffer (2.85 mL, pH 7.2). The buffer was made from solution A (720  $\mu$ L), solution B (280  $\mu$ L) and mQ water (9 mL). Solution A was made from Na<sub>2</sub>HPO<sub>4</sub> anhydrous (1.4196 g) was dissolved in mQ water (10 mL) and solution B from Na<sub>2</sub>H<sub>2</sub>PO<sub>4</sub> x H<sub>2</sub>O (1.3795 g) was dissolved in mQ water (10 mL). The reaction mixture was heated in drying chamber for 24 h at 37 °C, and for additional 24 h at 65 °C. We observed precipitation of **3m**<sup>1</sup> with time. The reaction mixture (40  $\mu$ L) was dissolved in methanol and checked by HPLC.

nm.

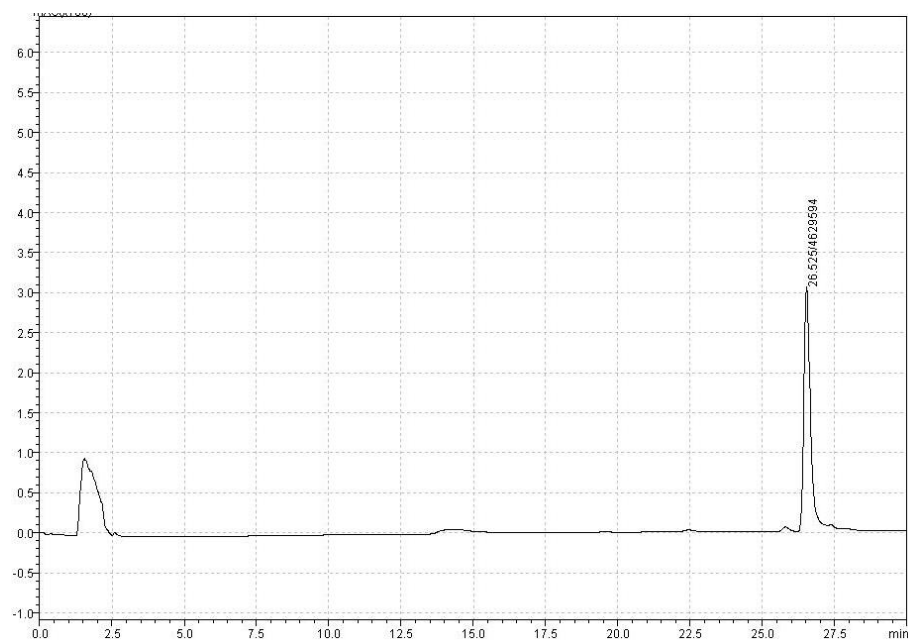

Fig. SI-10. HPLC spectrum of **3m**<sup>1</sup> dissolved in buffer before heating.

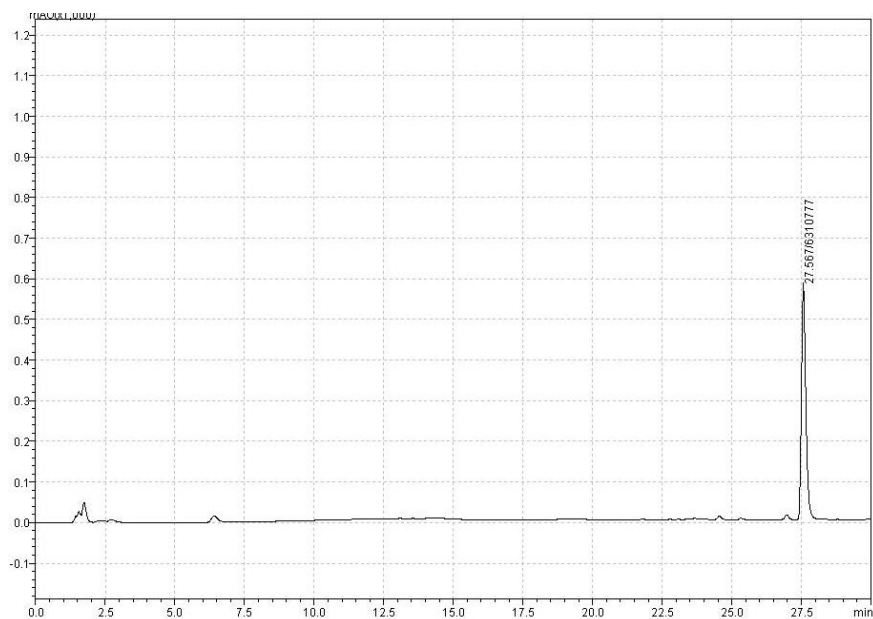

Fig SI-11. HPLC spectrum of  $3m^1$  after 24h at 37 °C, and 24 hat 65 °C.

Analysis was performed on Zorbax RF XDB-C18 column (3,5  $\mu$ m, 4,6 · 75 mm). Solvents for the analysis were 0.1% acetic acid in water (solvent A) and methanol (solvent B). The gradient was applied as follows: 0-5 min, 50 % B/50 % A, 5-25 min, 70 % B/30 % A, 25-27 min, 100% B; 27-27,1 min, 50 % B/50 A; 27.1-30 min, 50 % B/50 % A. The flow rate was 0.5 mL/ min. UV detection was performed at 254 nm and 280 nm.

## 6. NMR SPECTRA OF ACYCLIC ENEDIYNES 2

All acyclic enediynes **2** are isolated as mixtures of diastereoisomers. Presence of two diastereoisomers, as well as rotamers (tertiary amide bond), cause proton signal broadening.

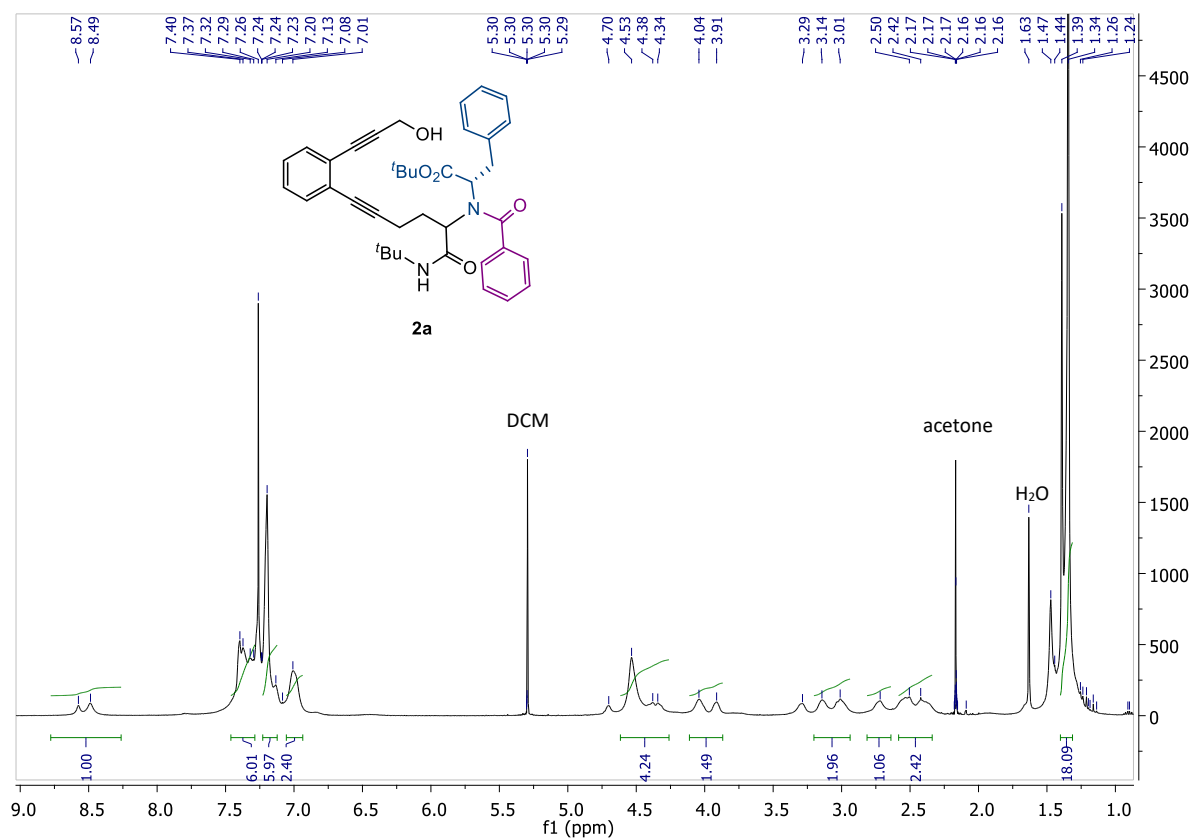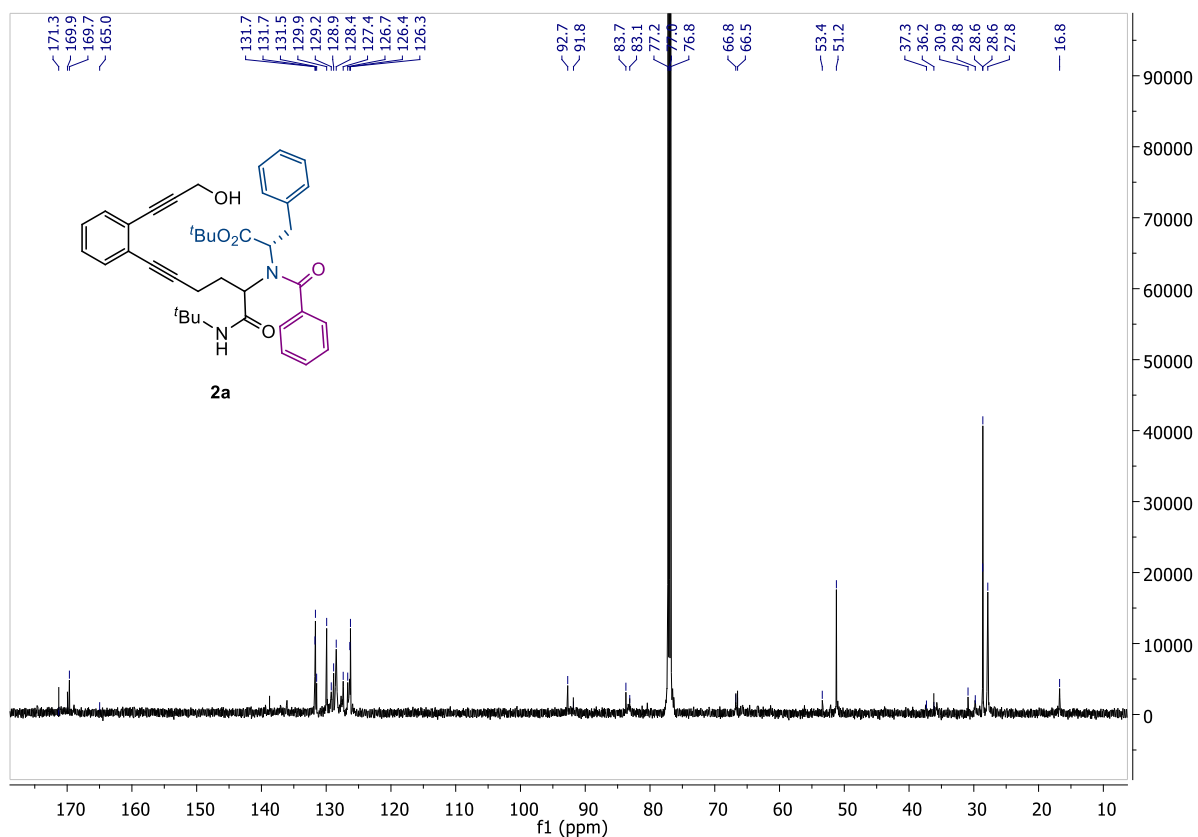

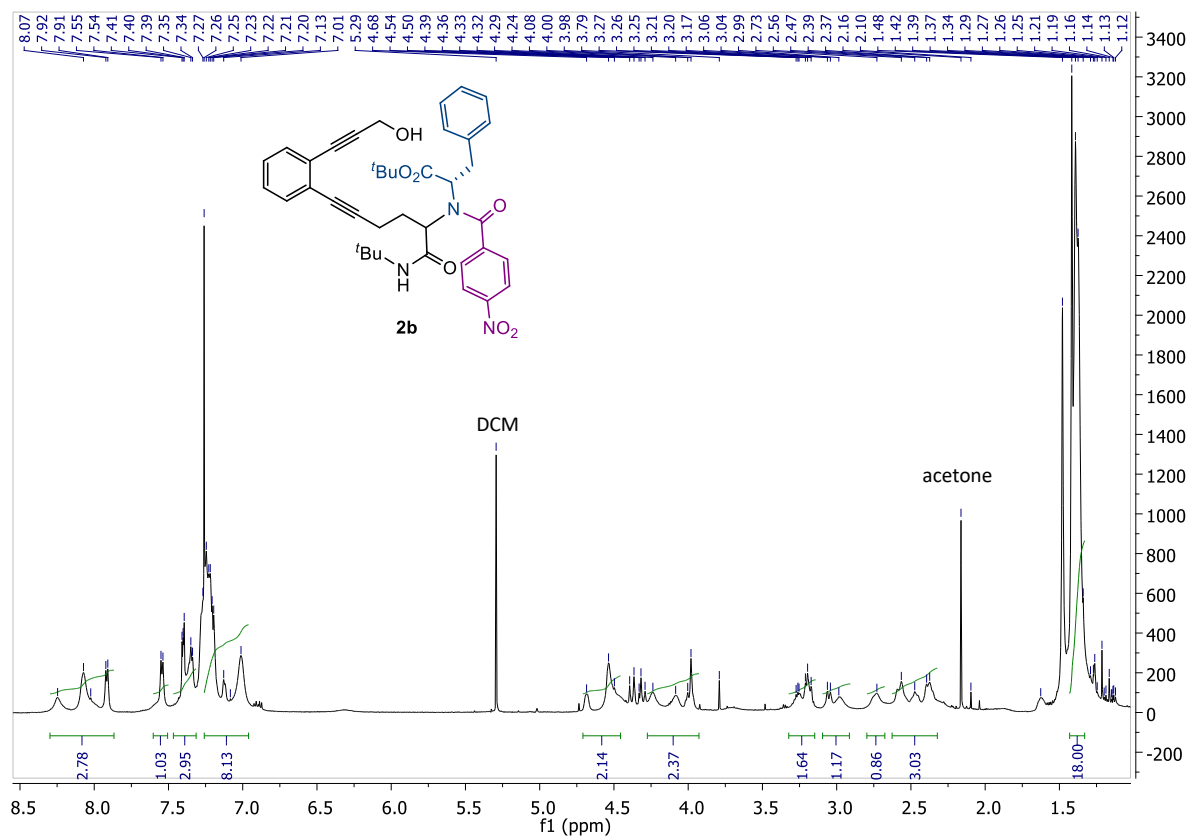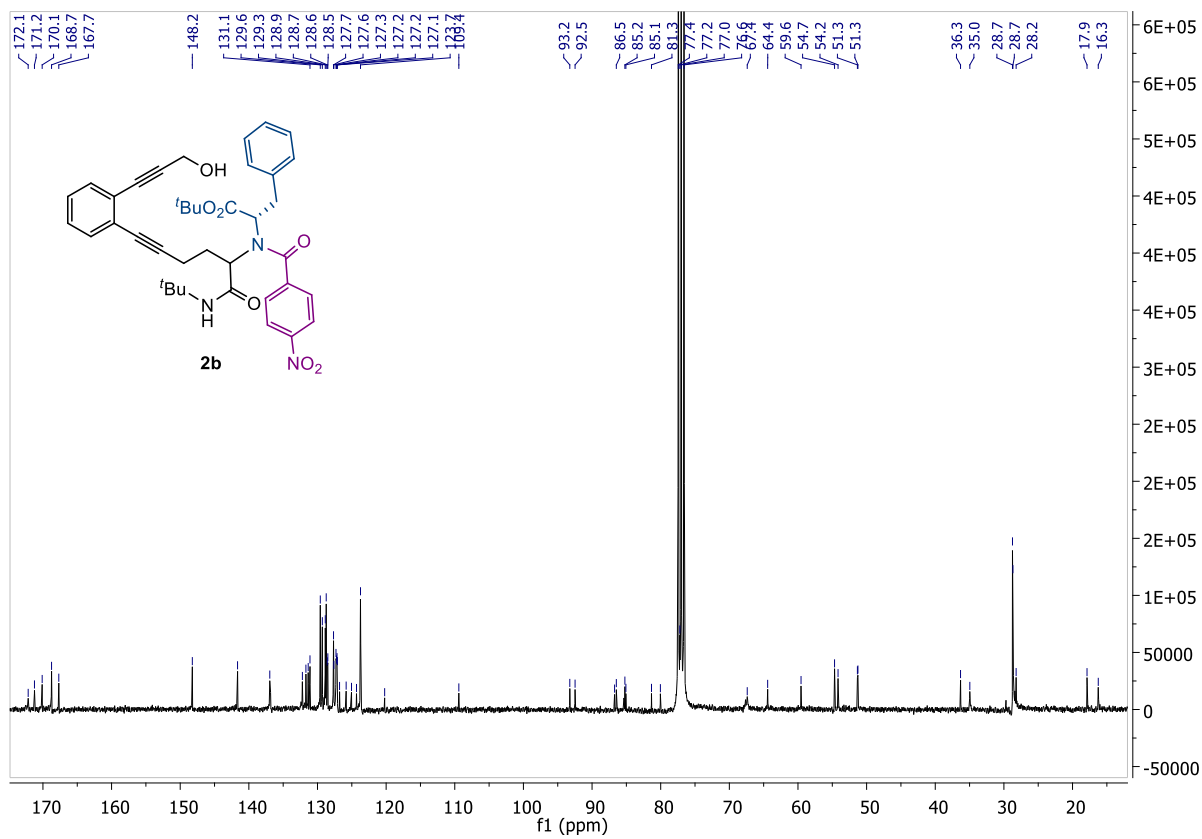



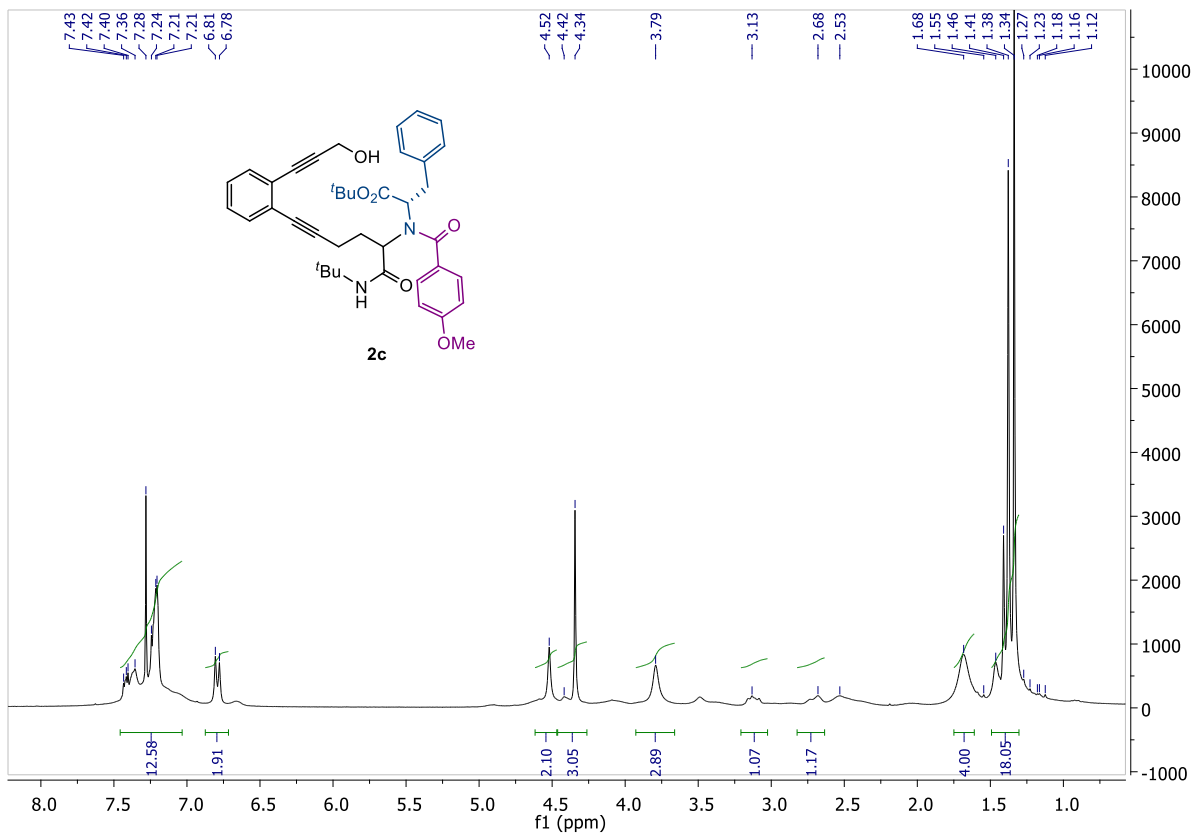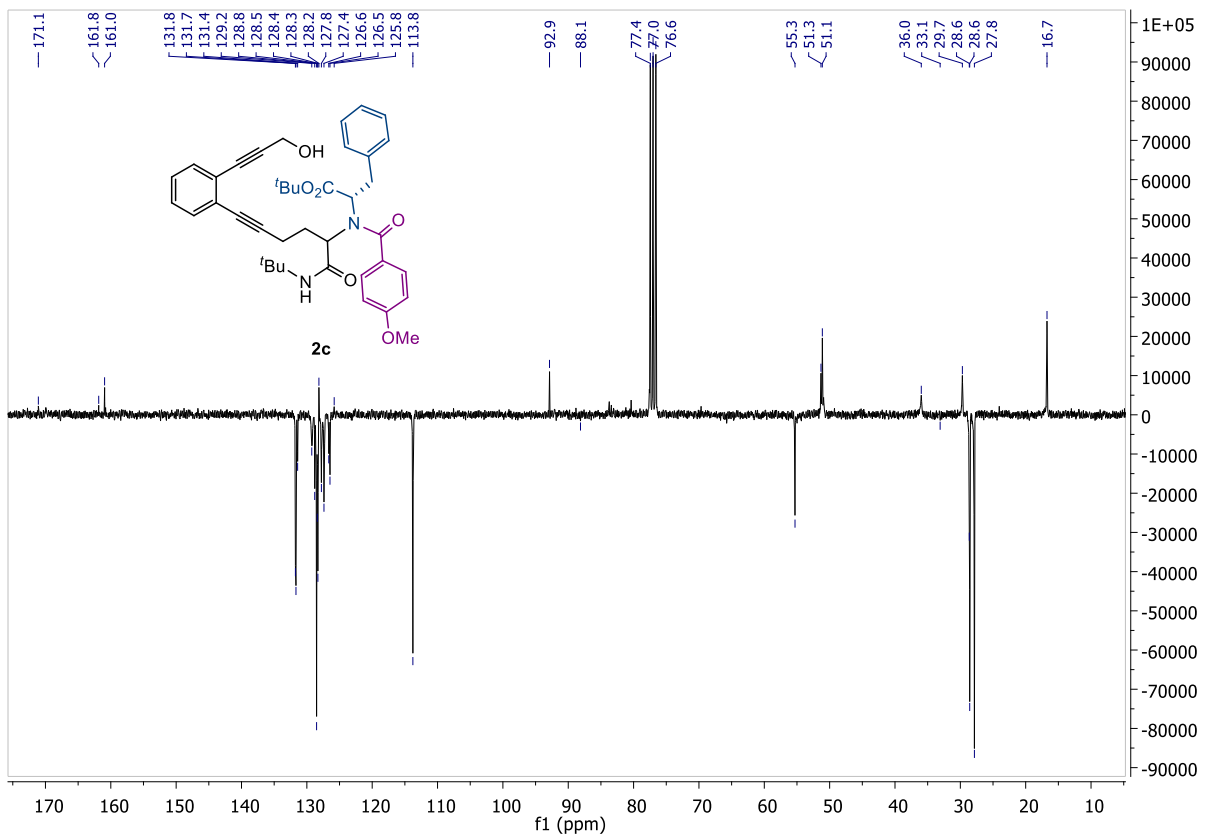

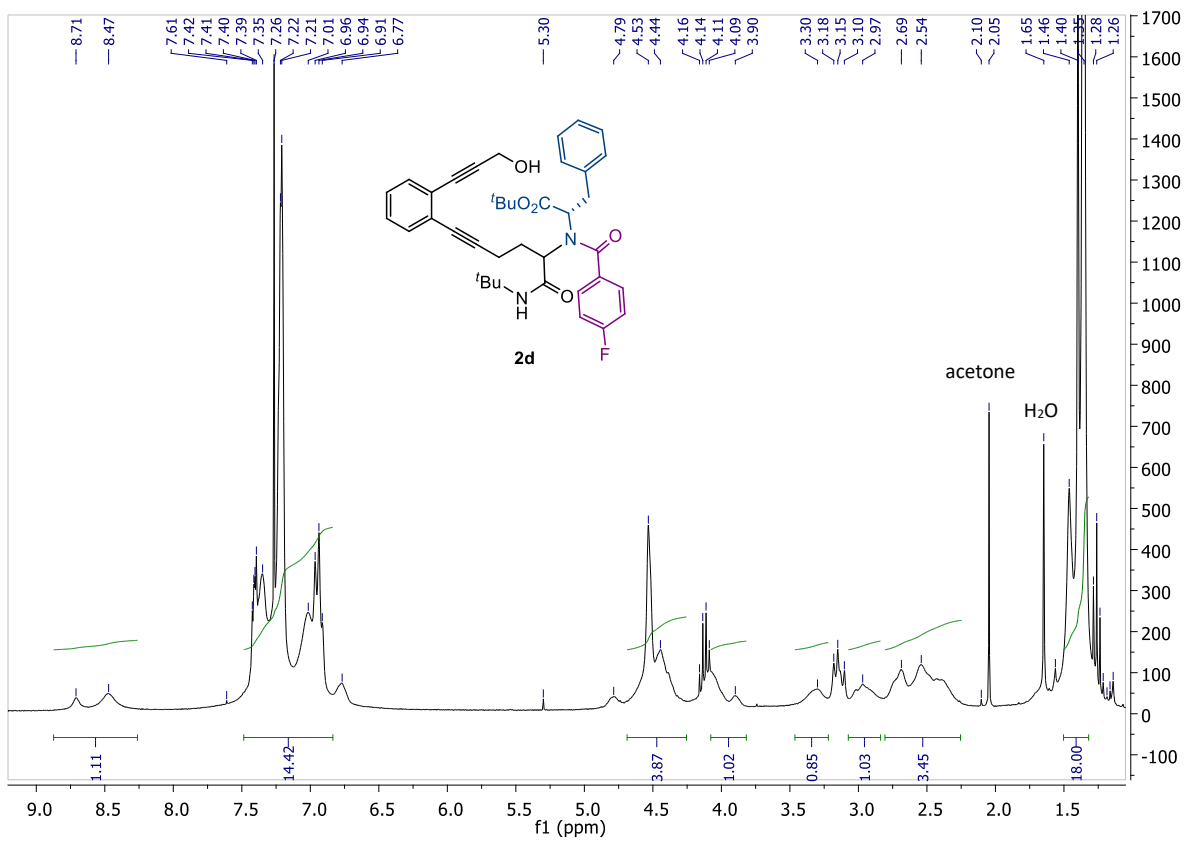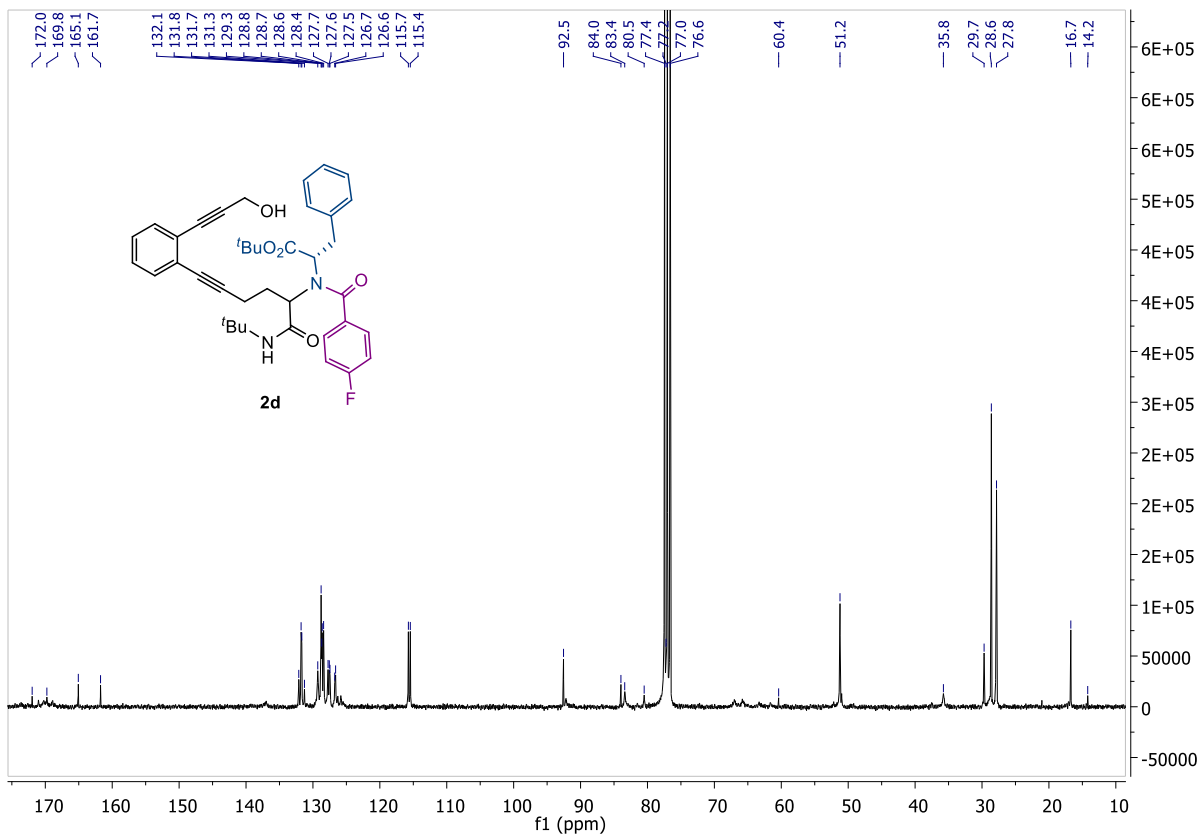

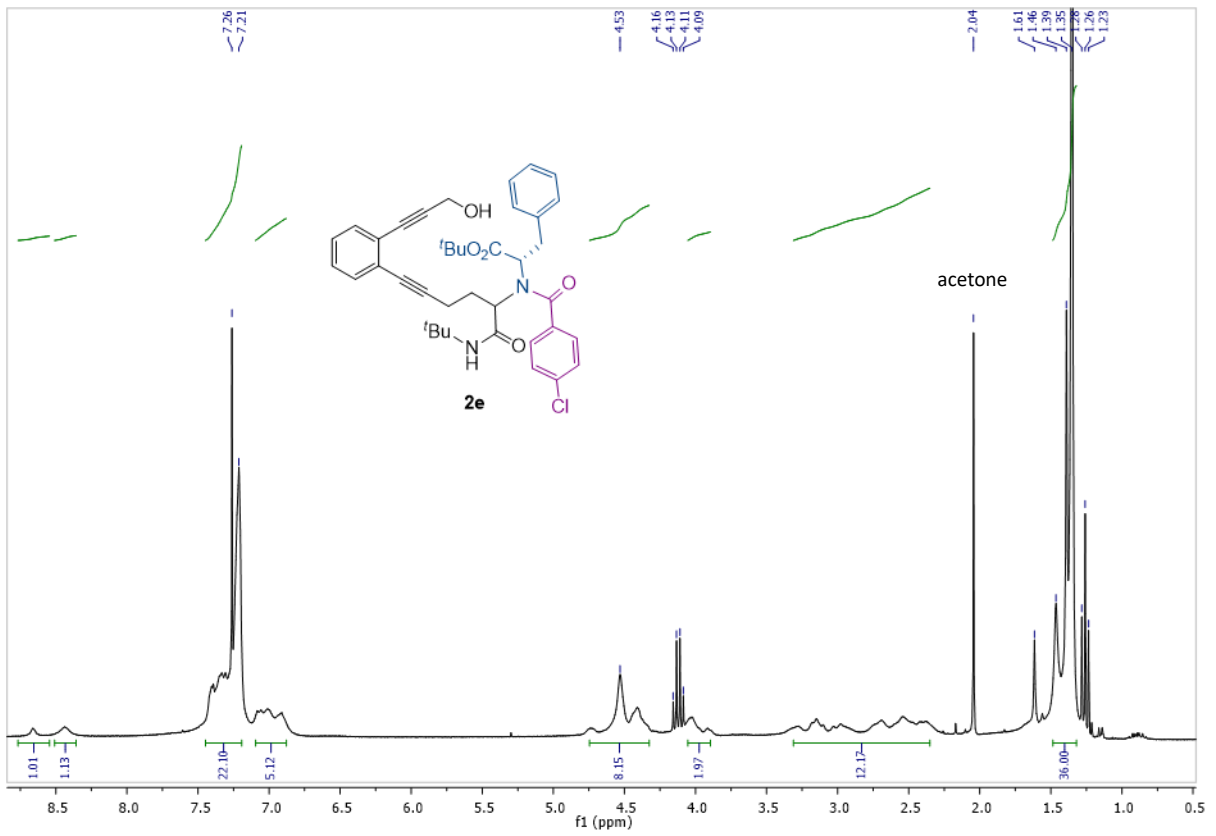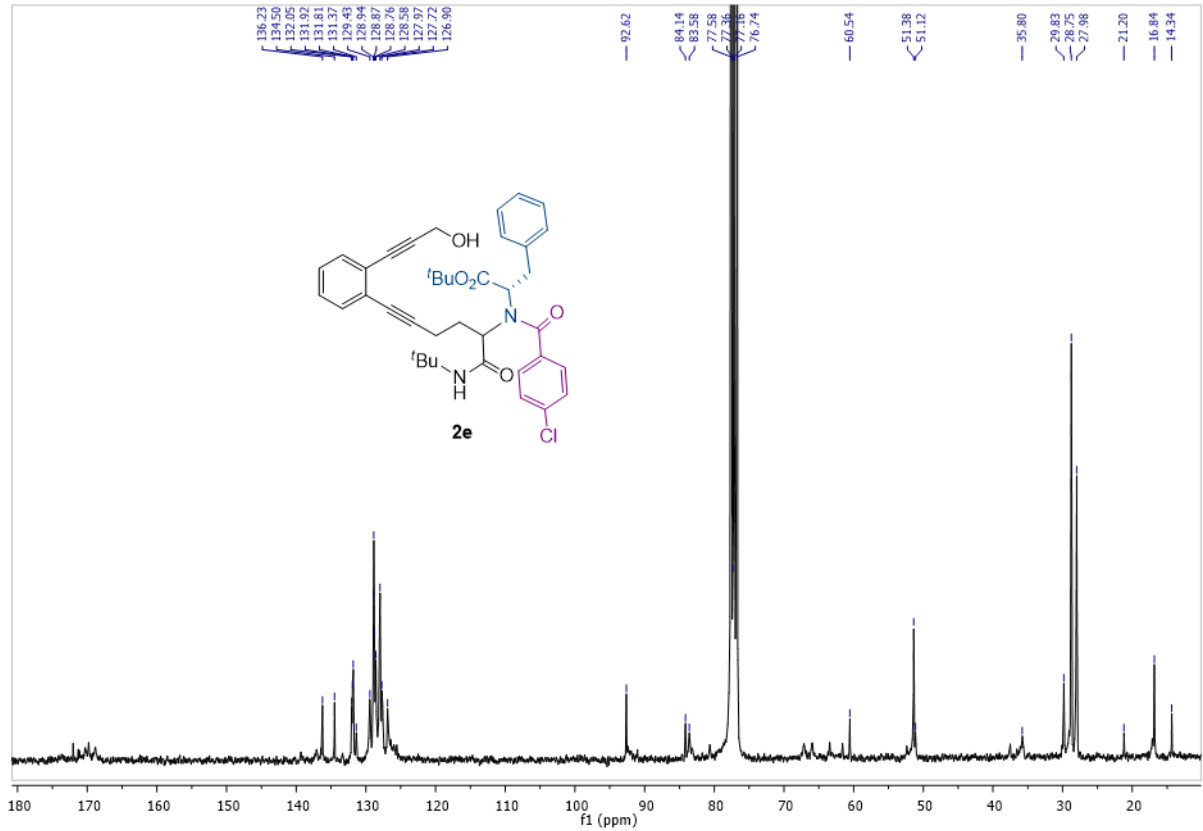

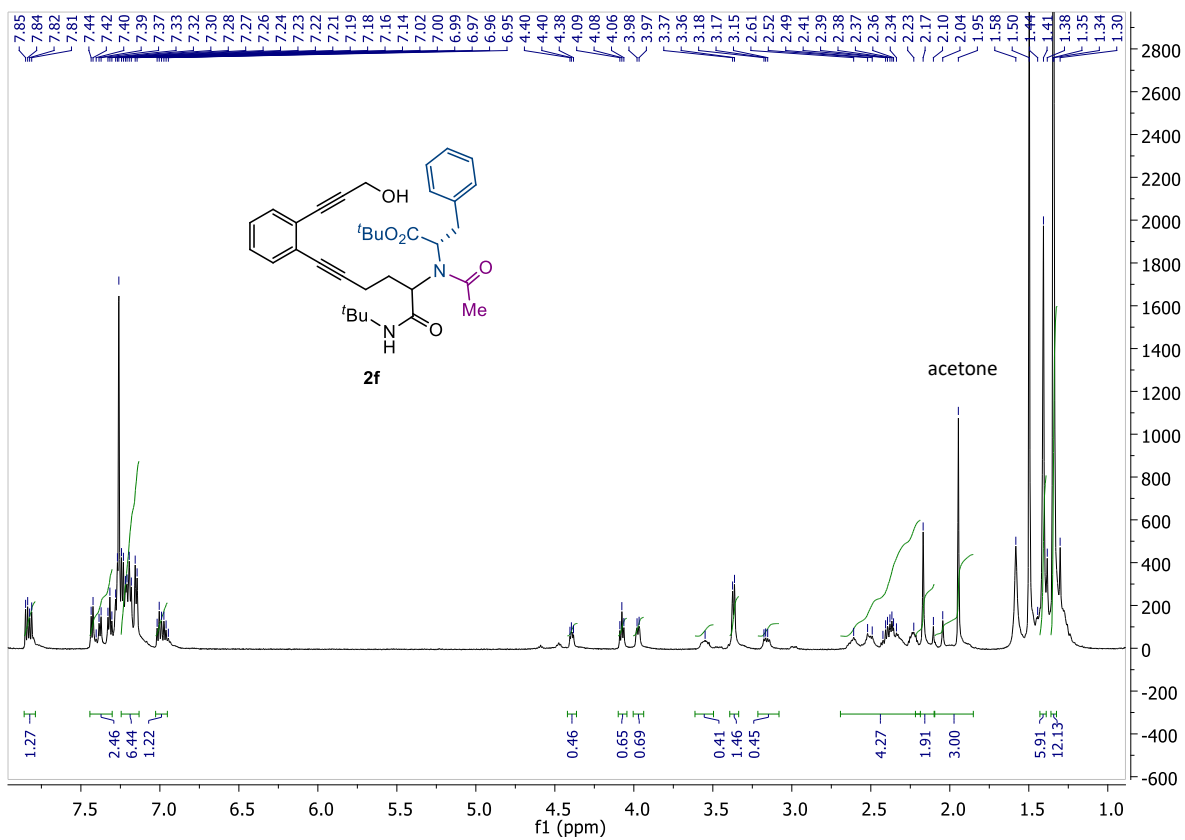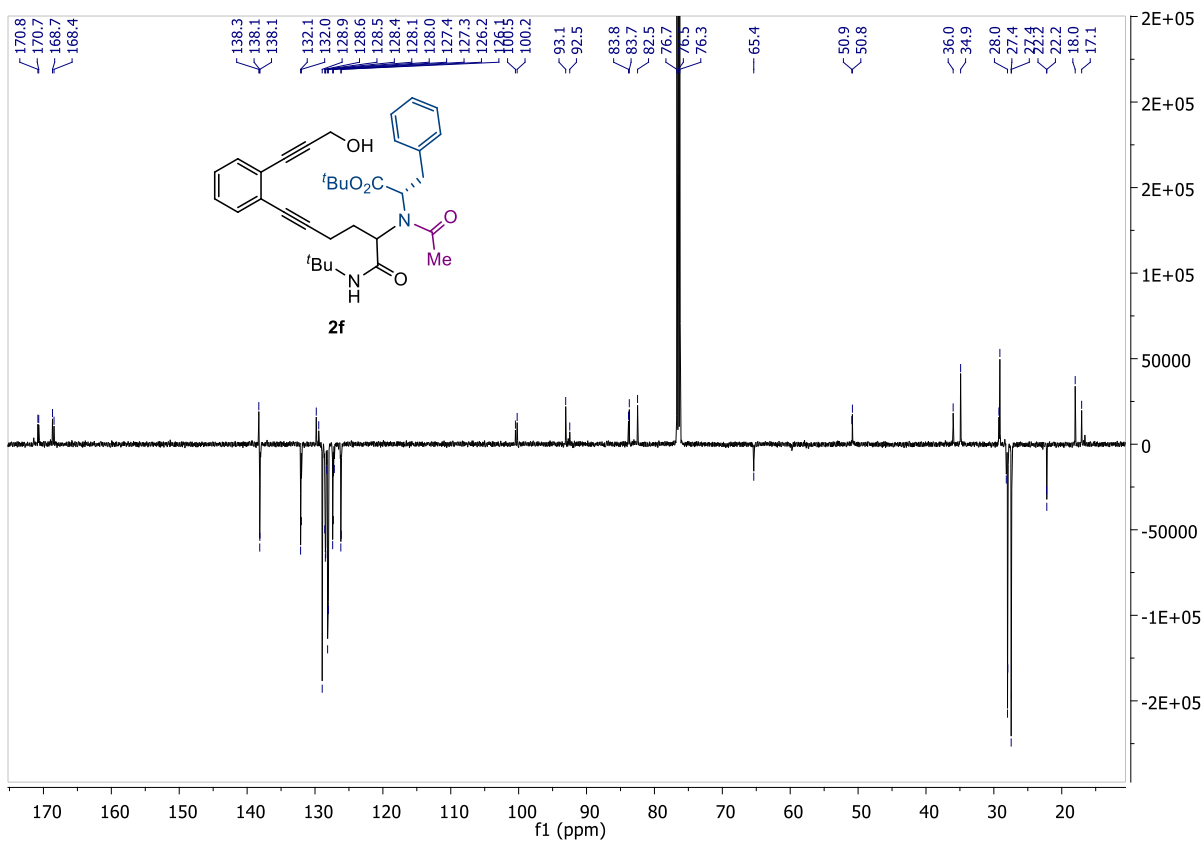

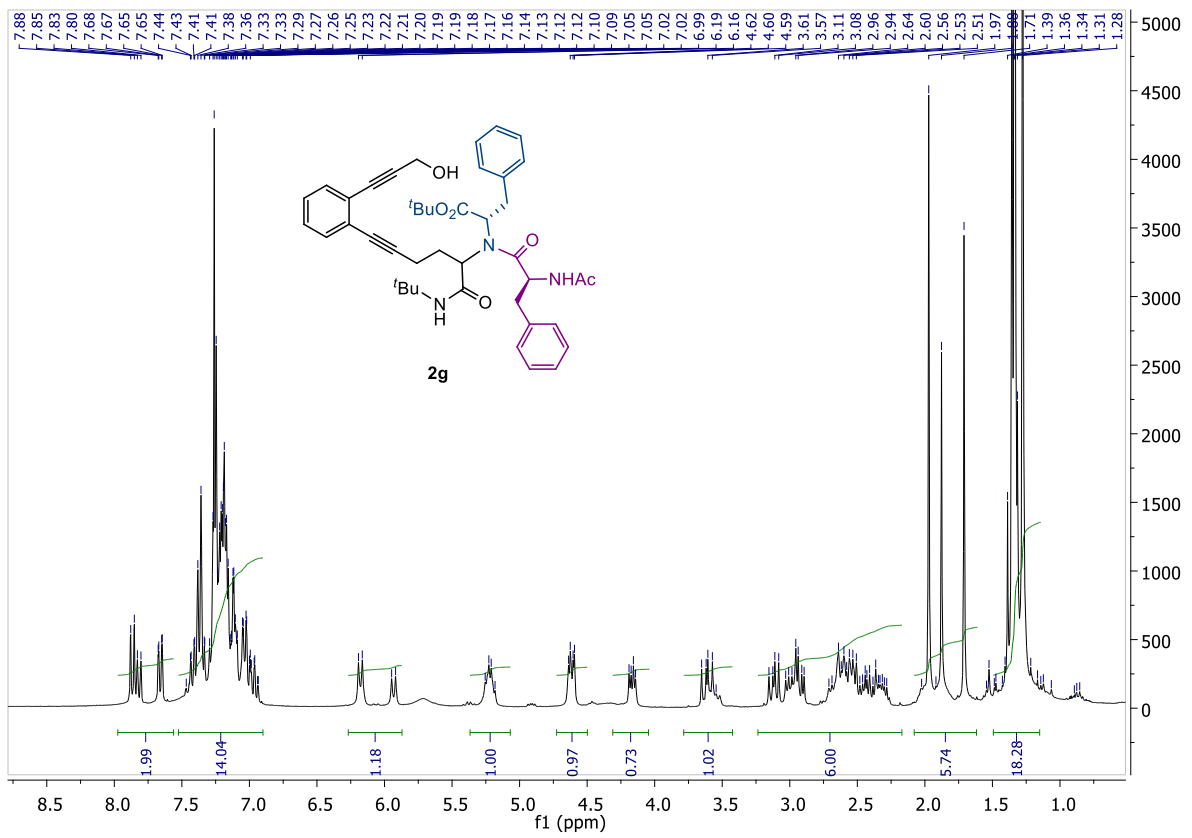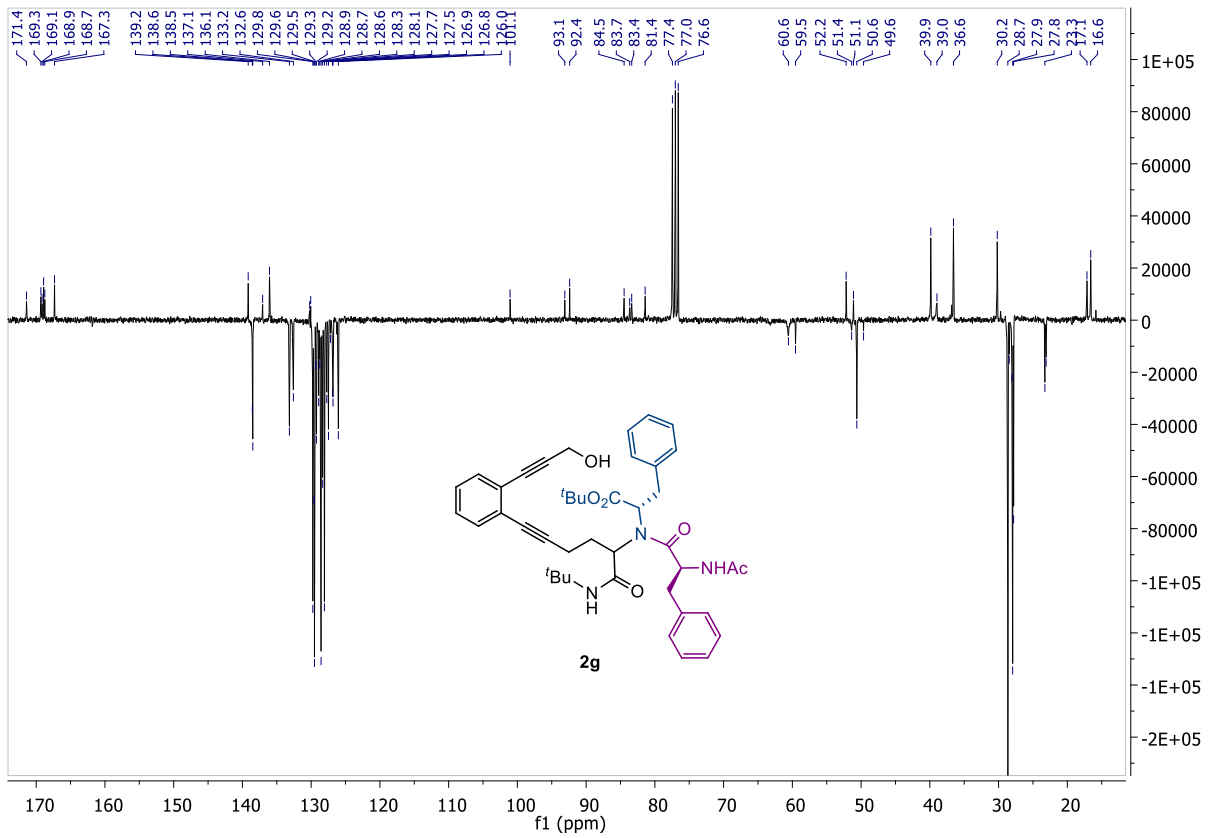

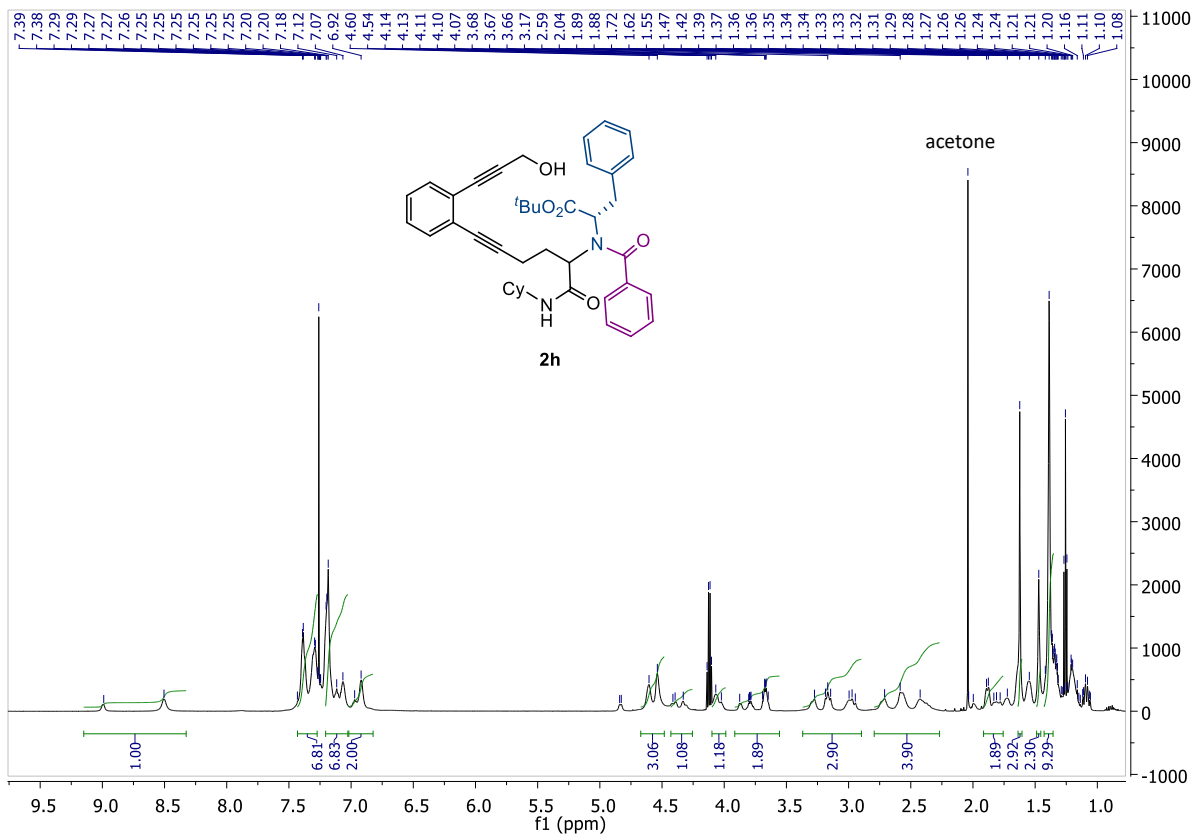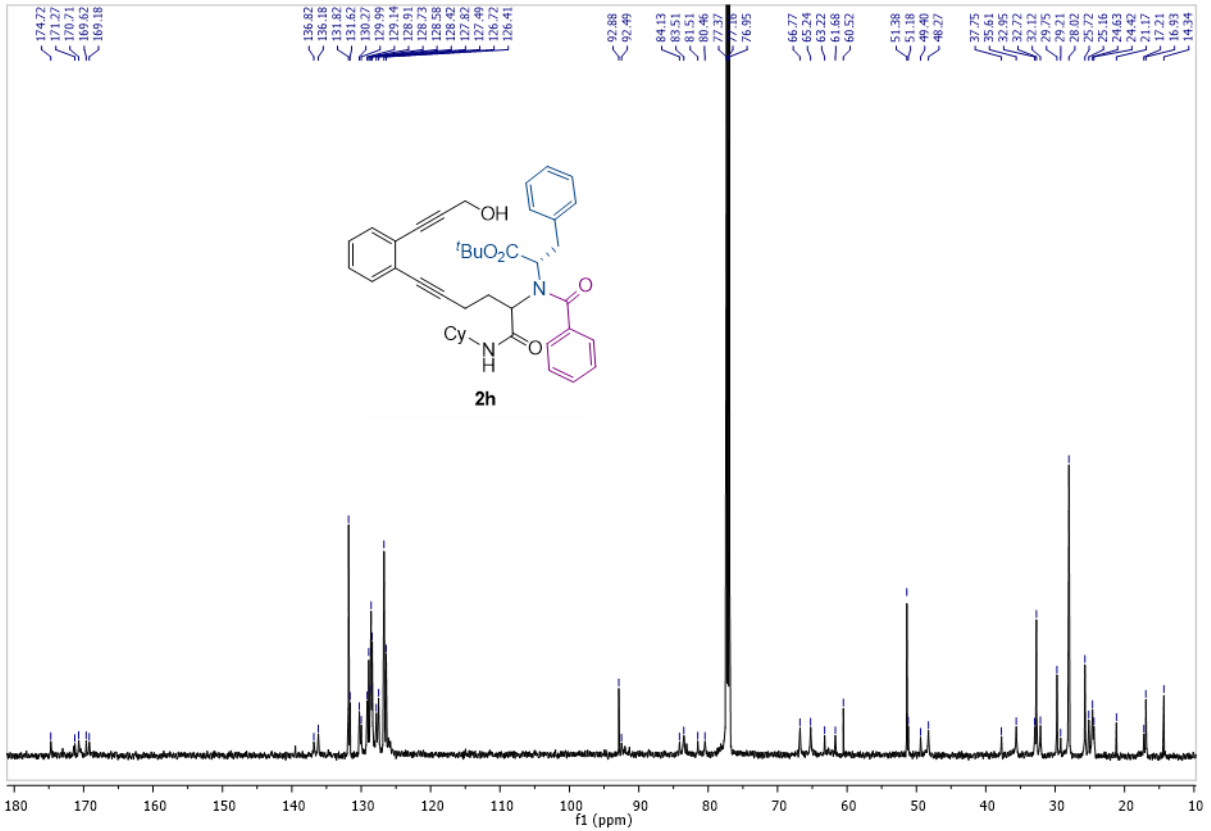

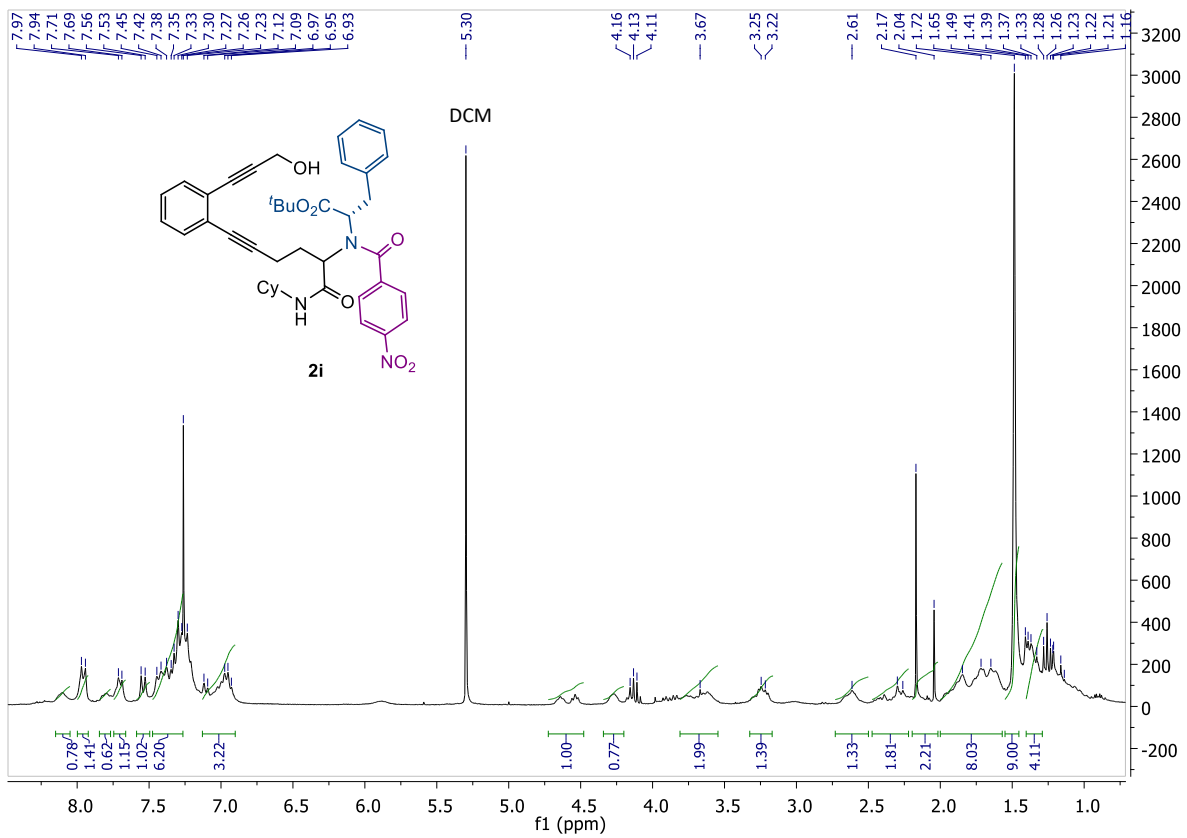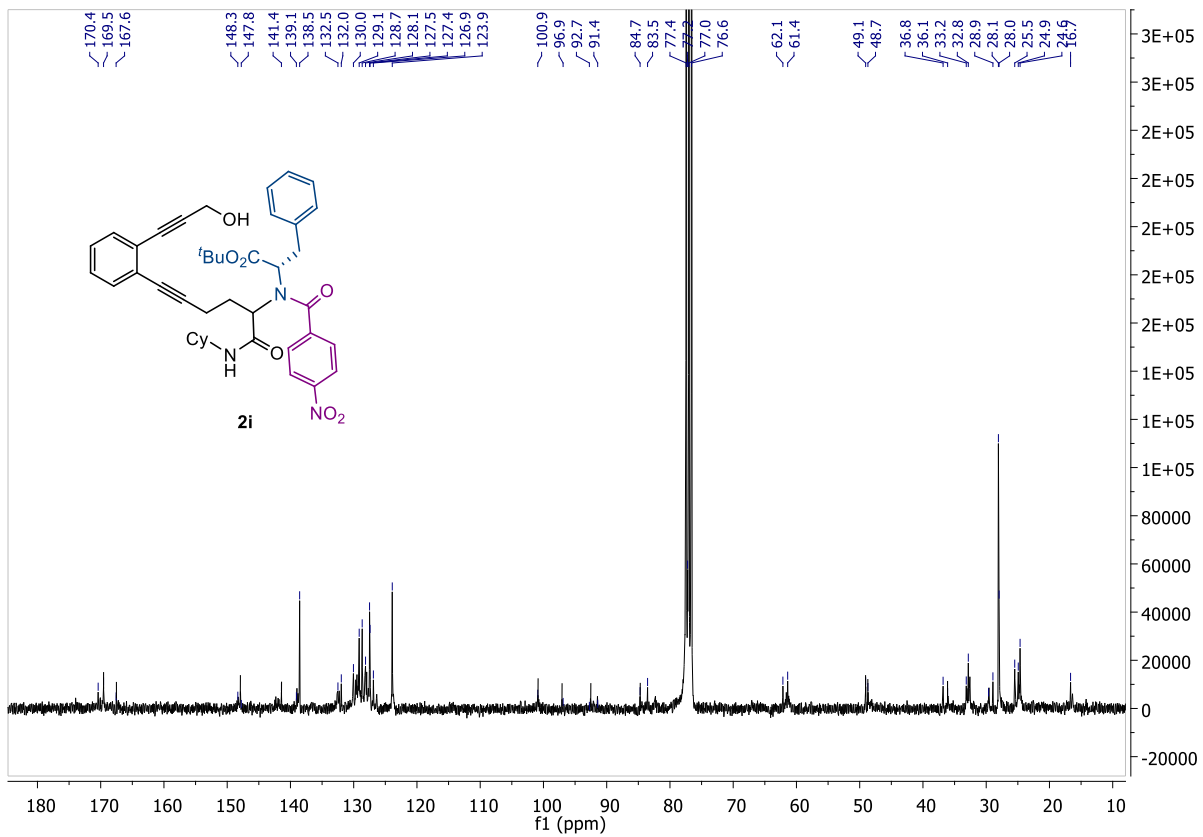

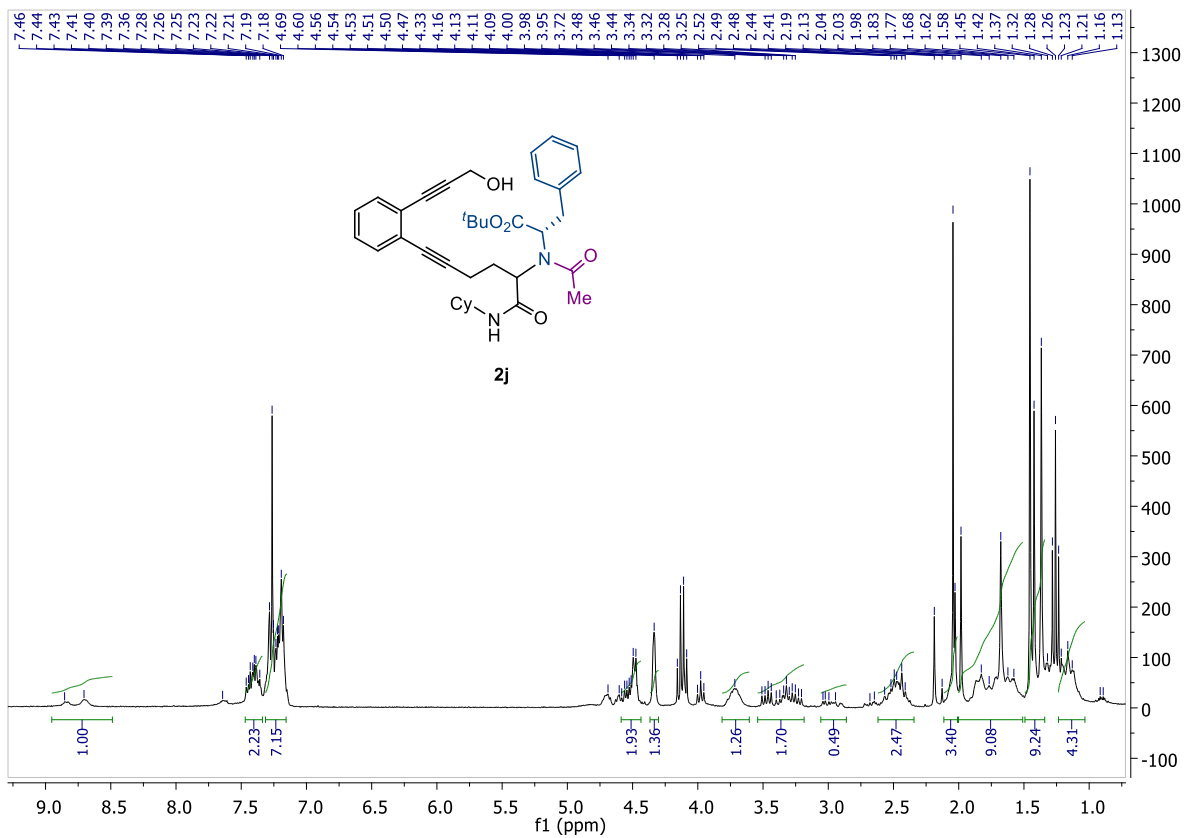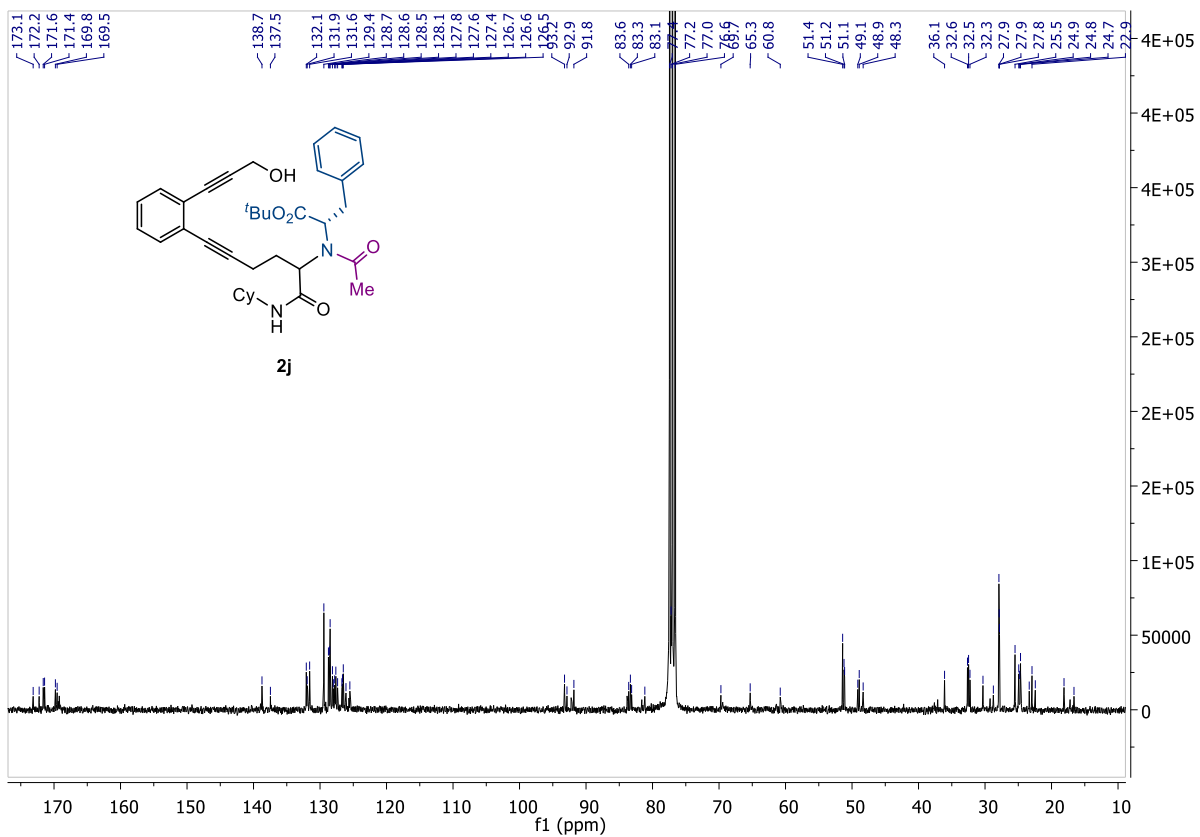



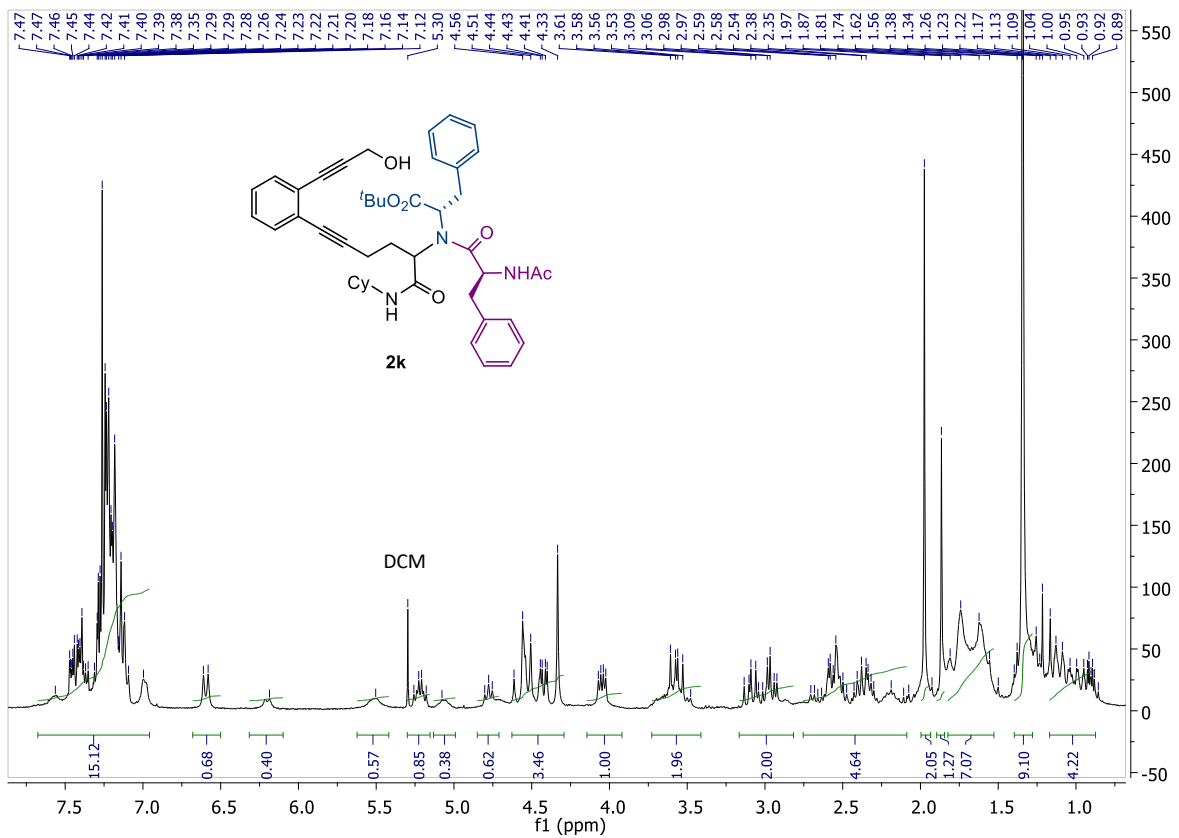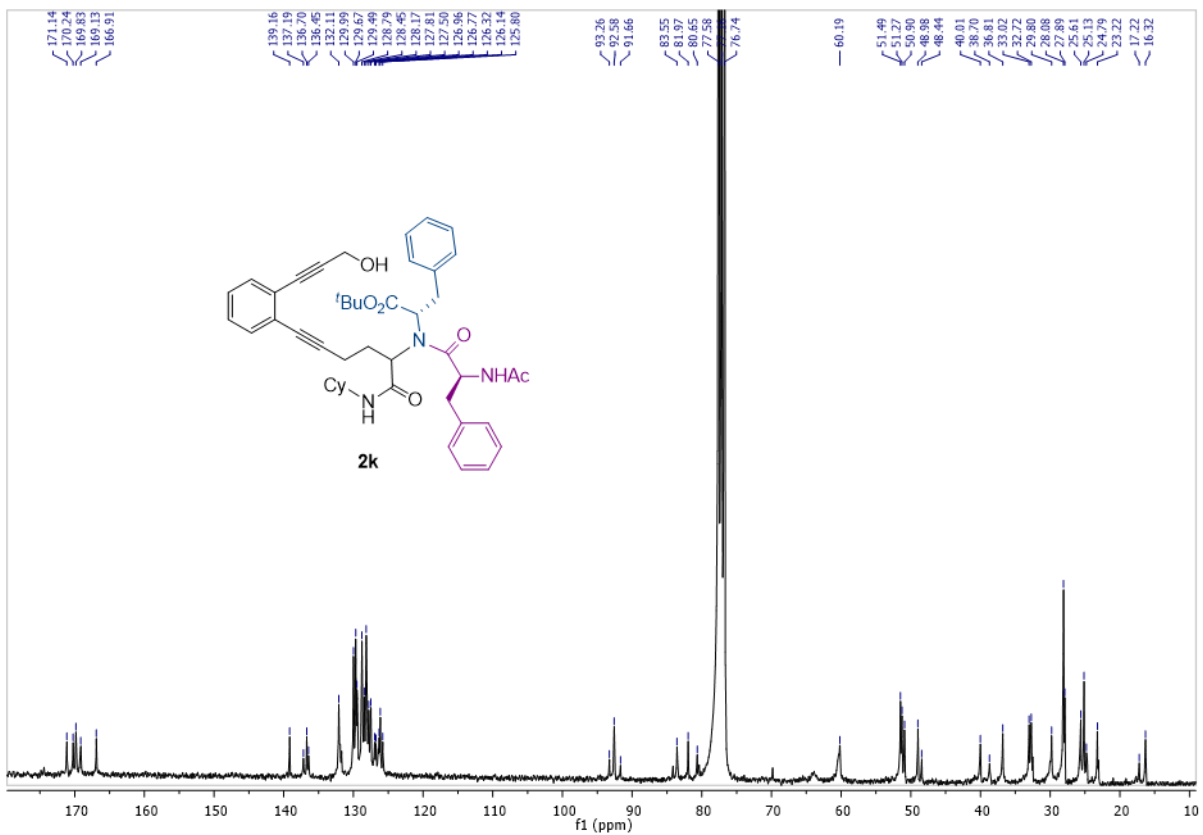

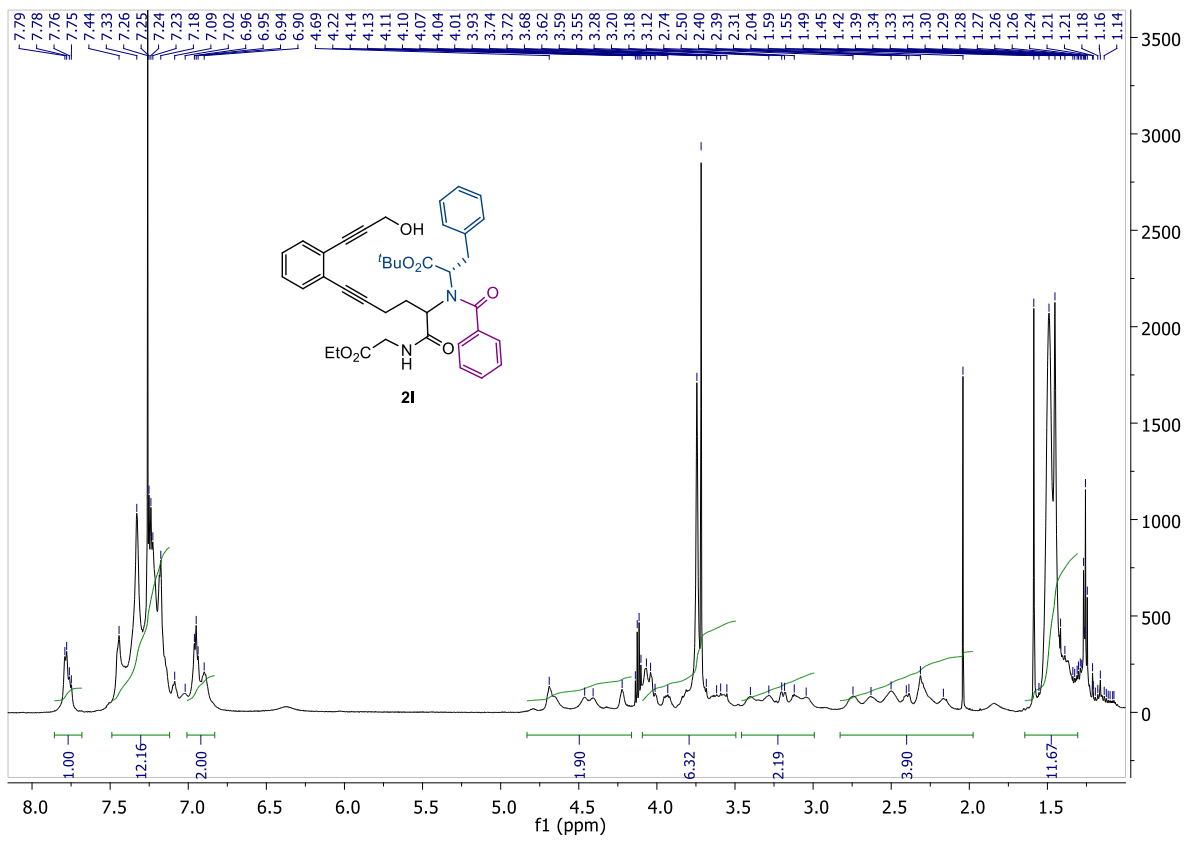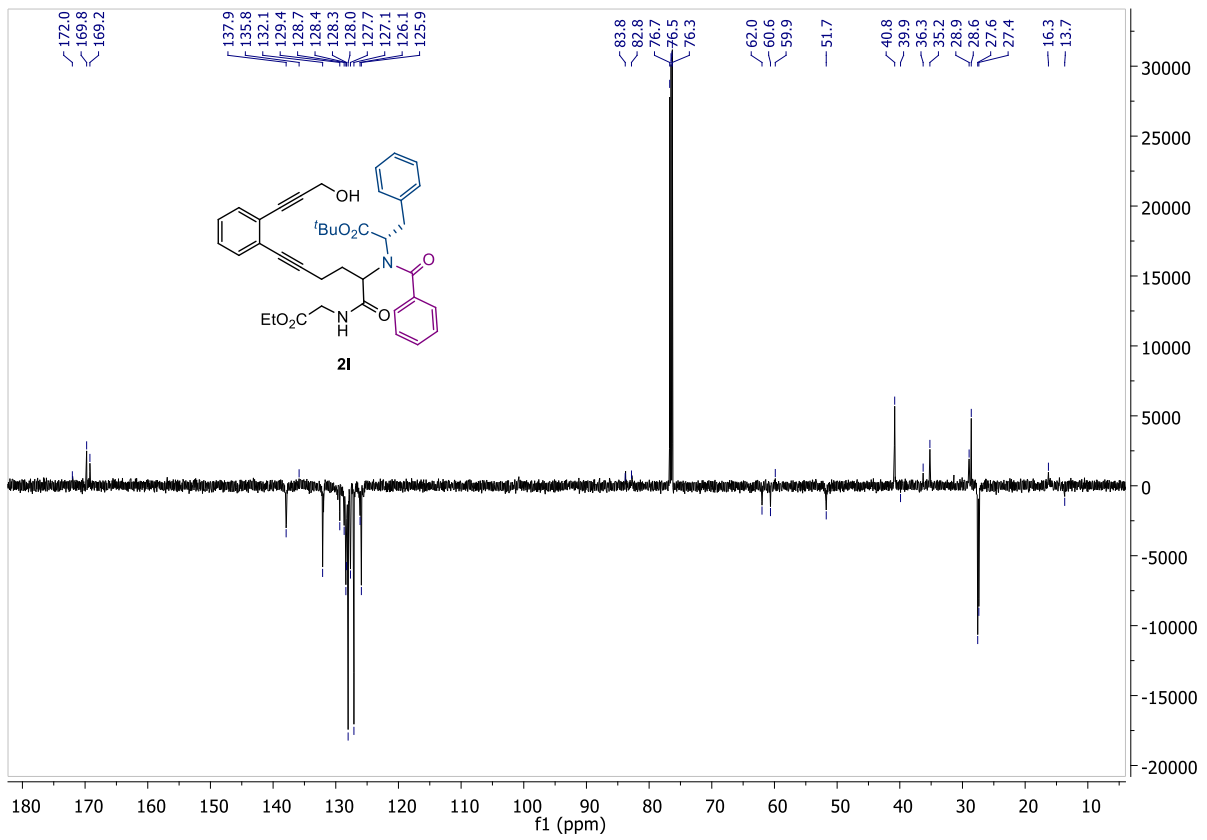

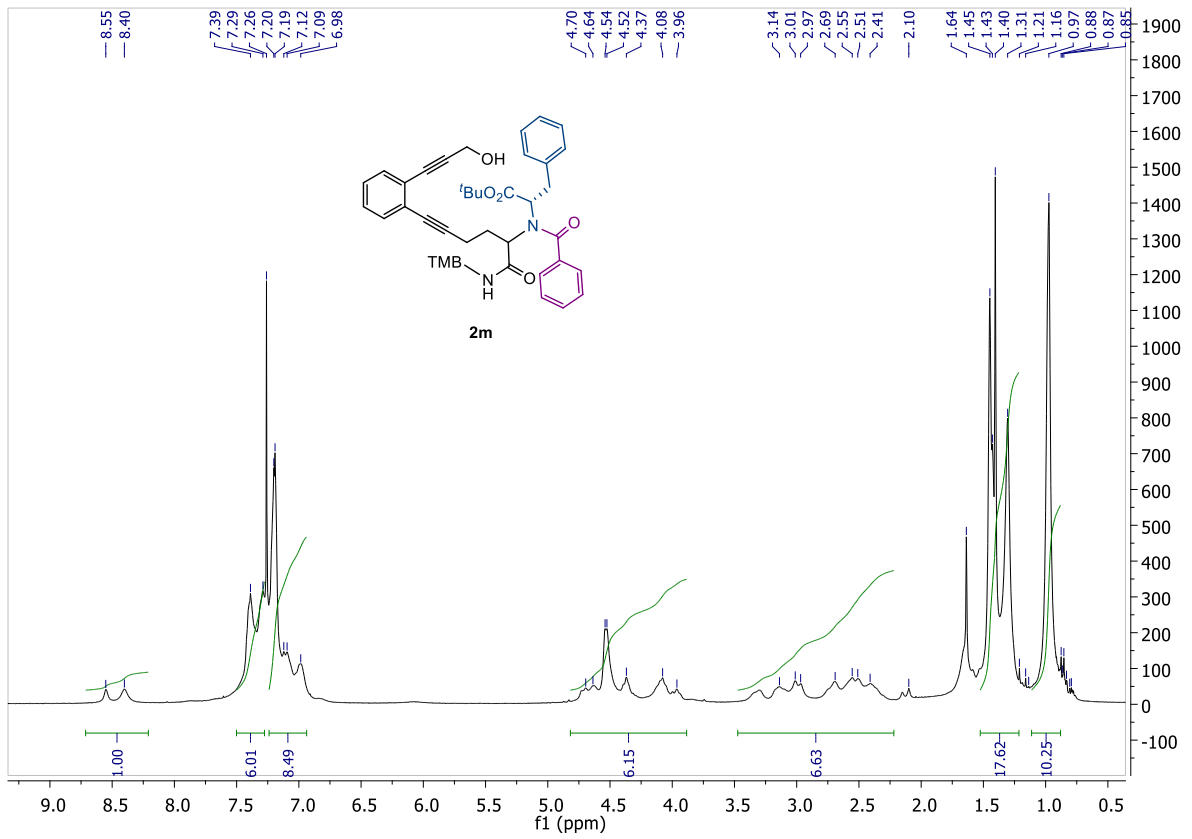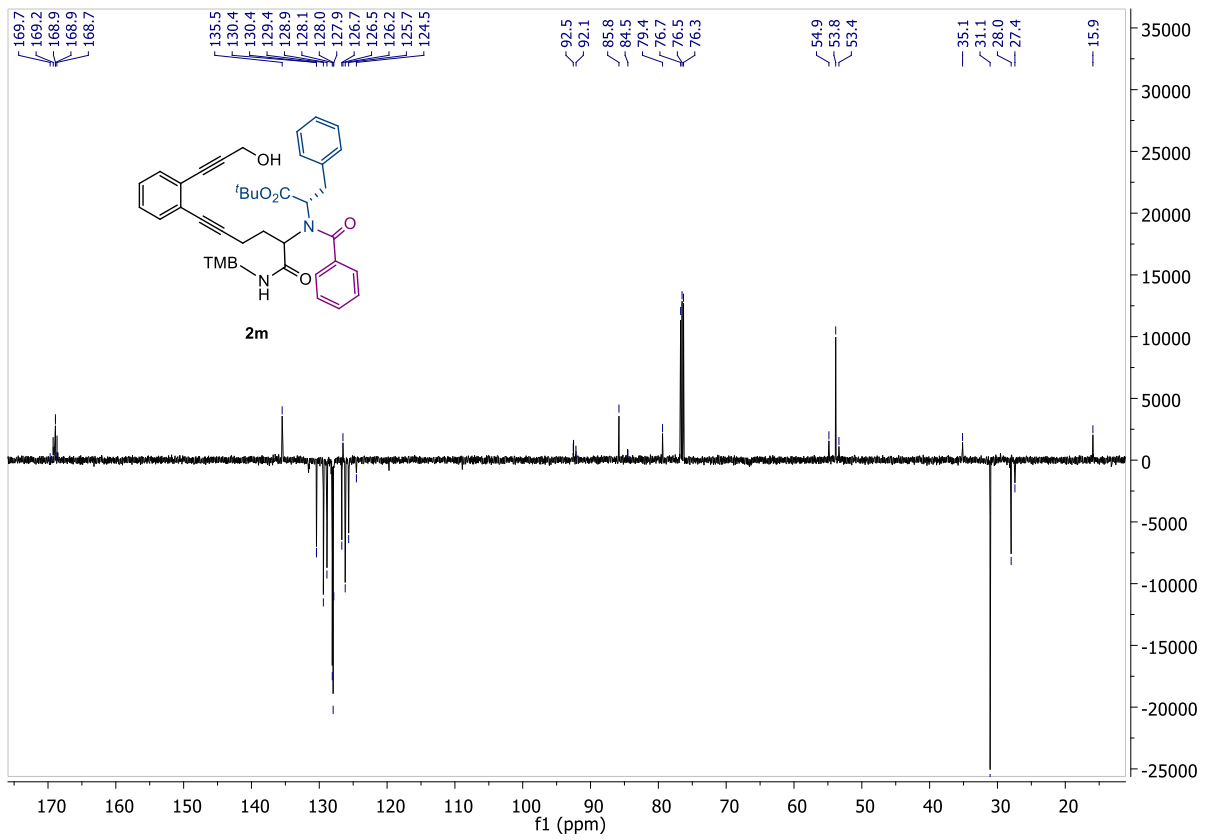

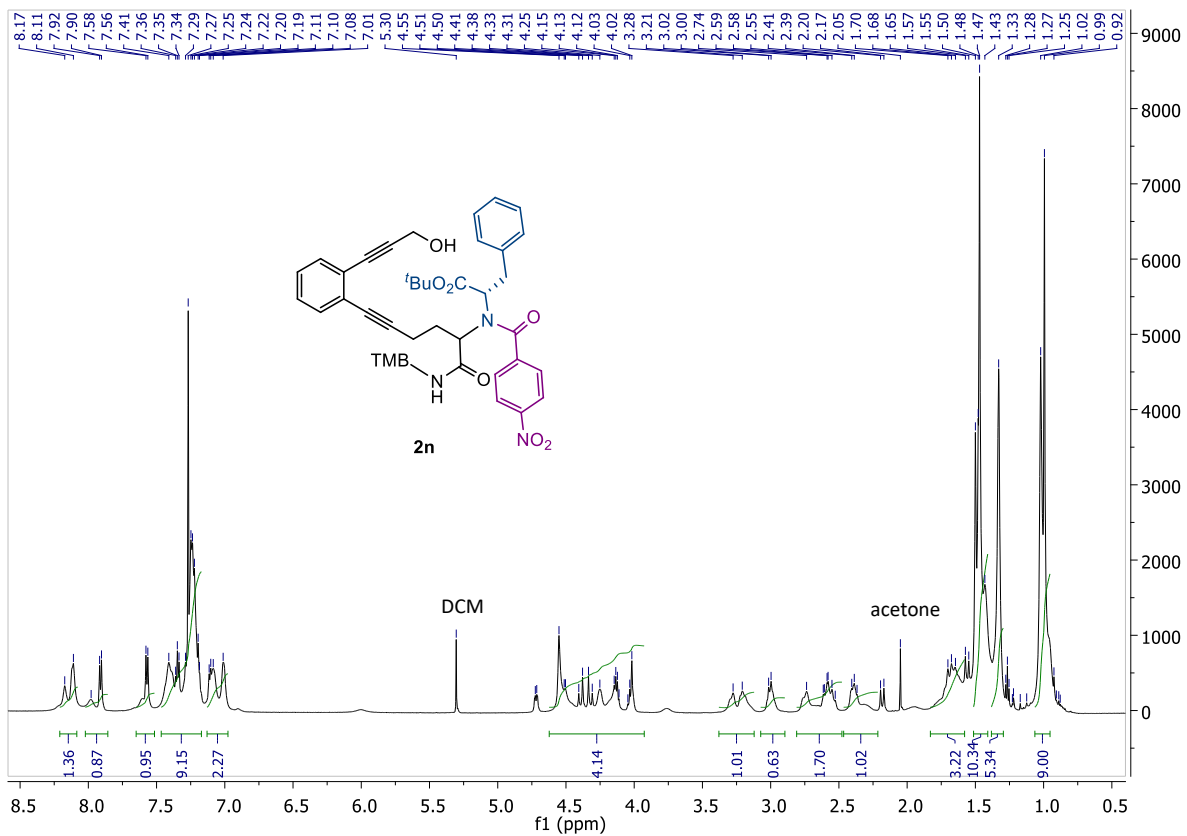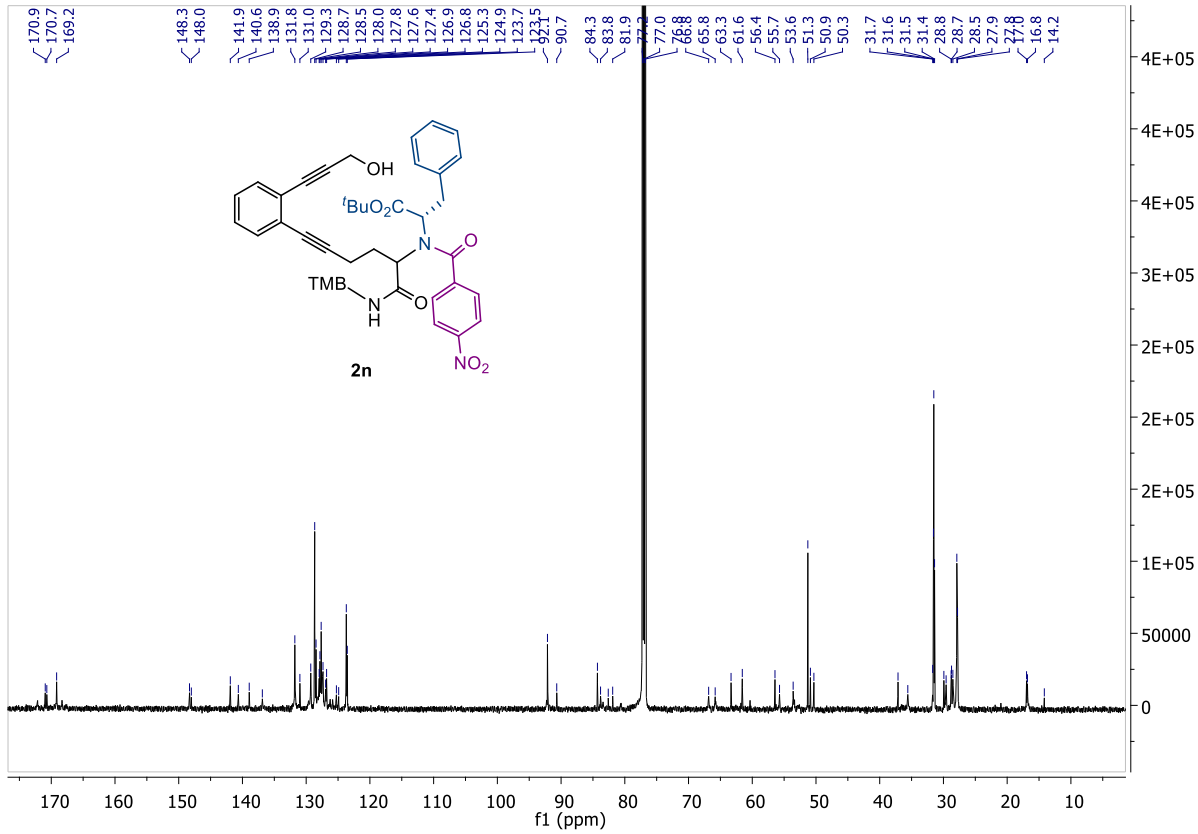

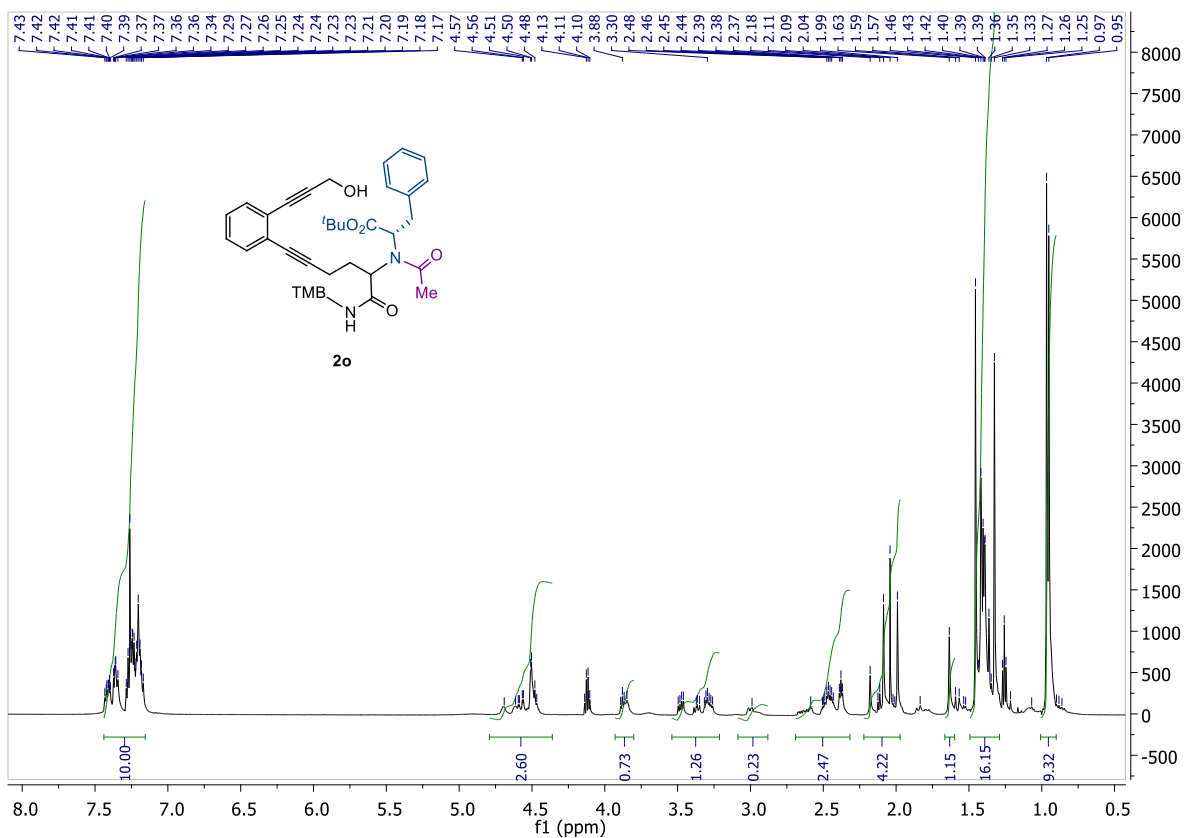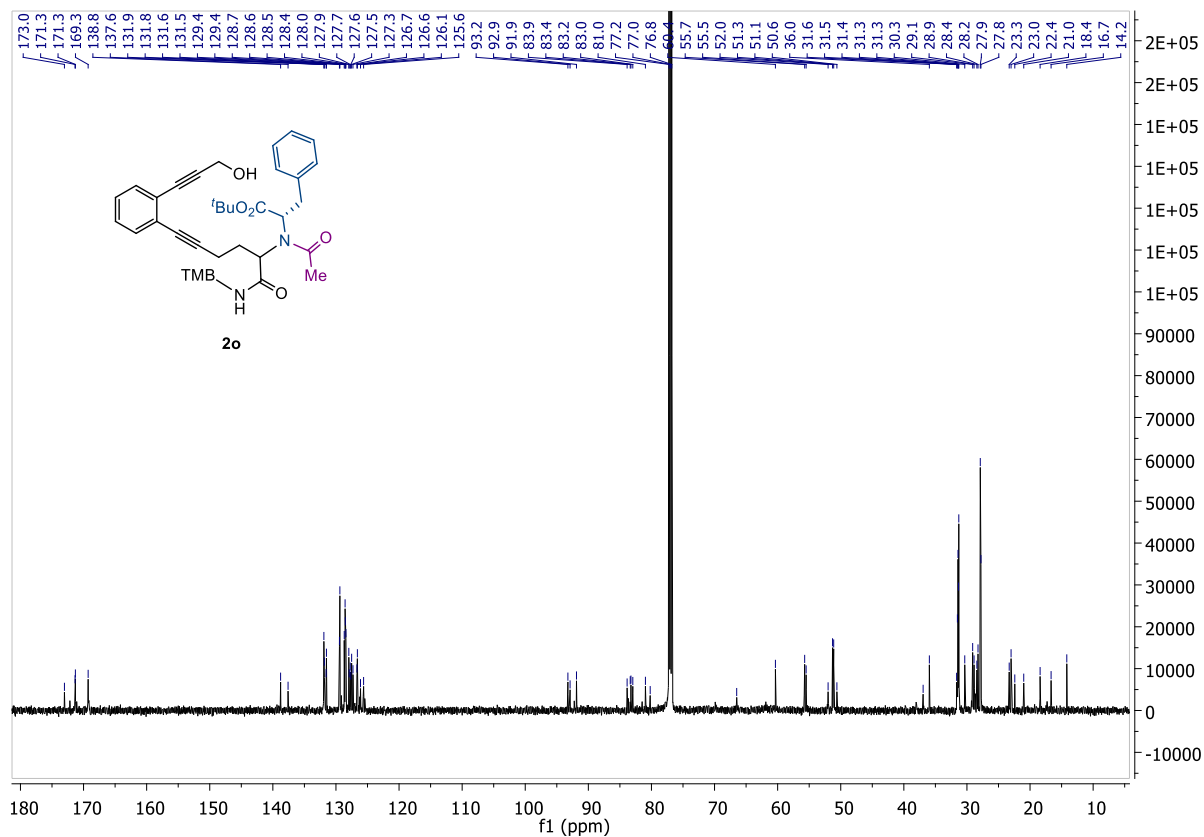

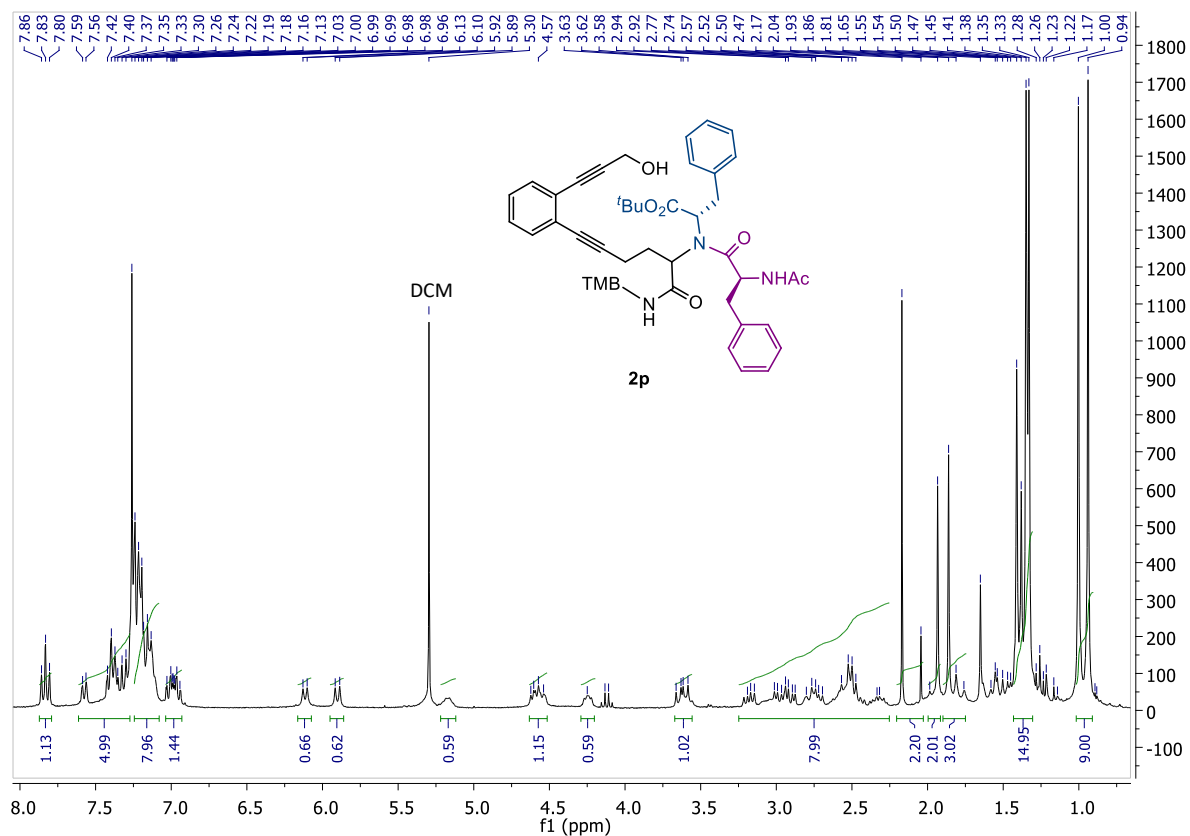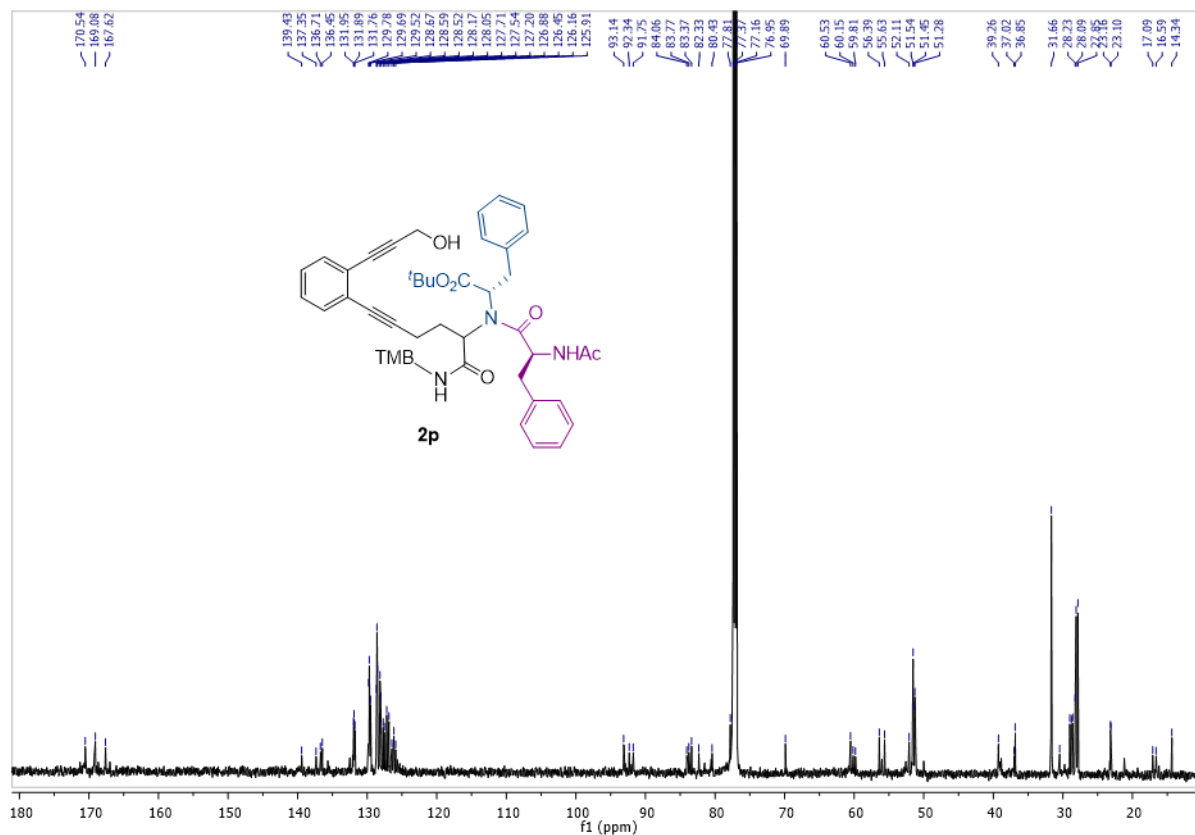

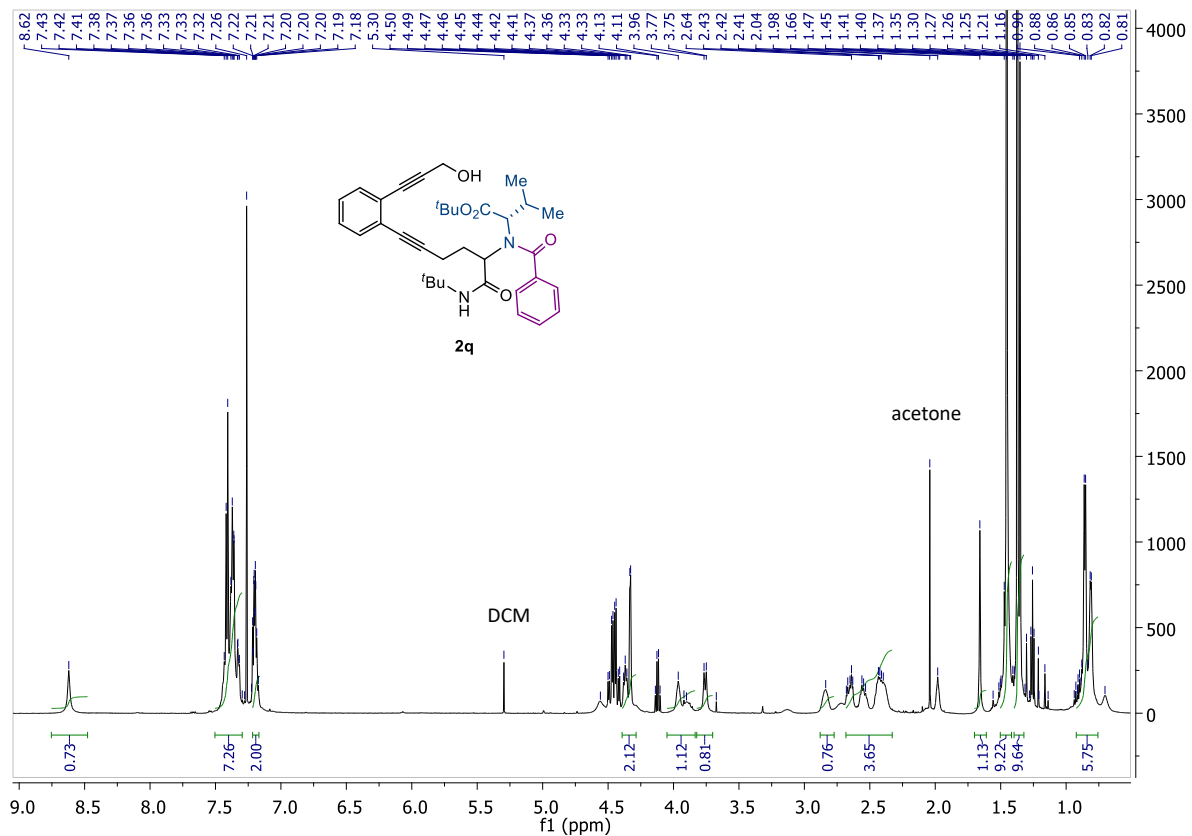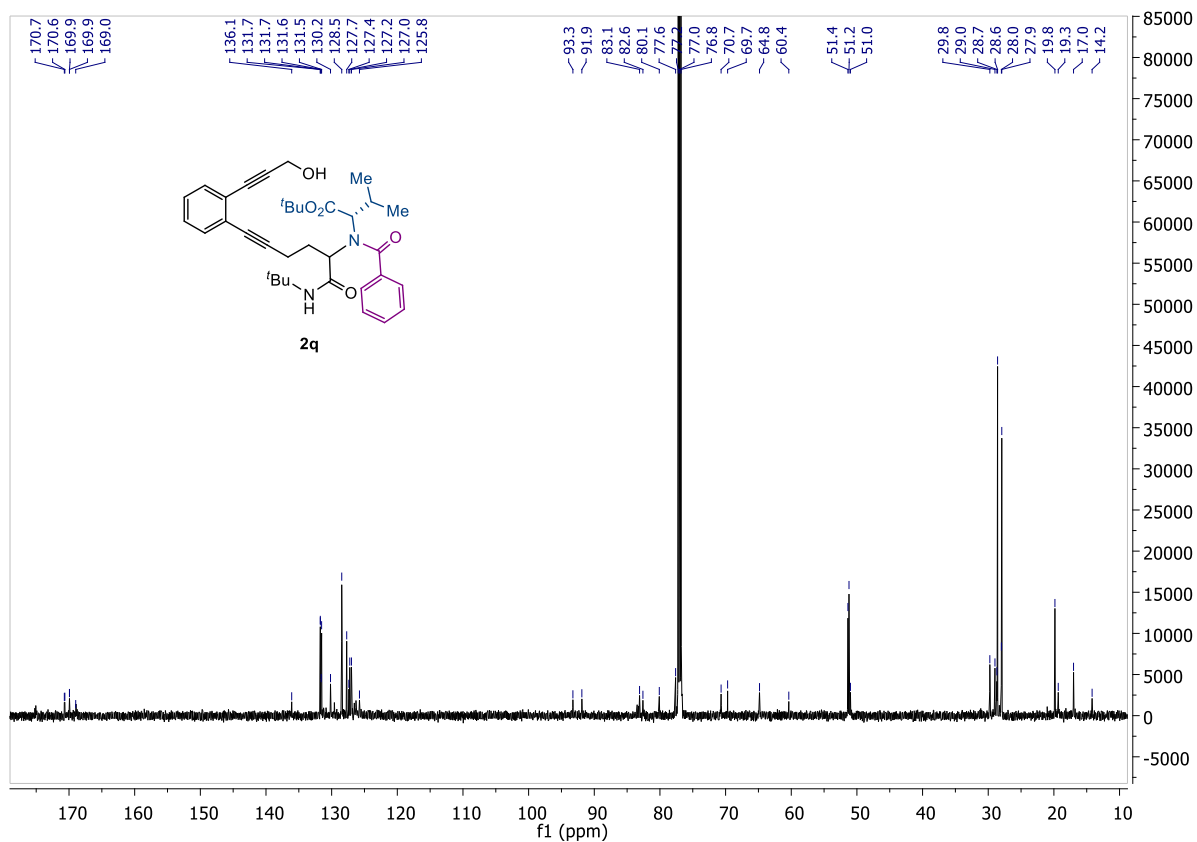

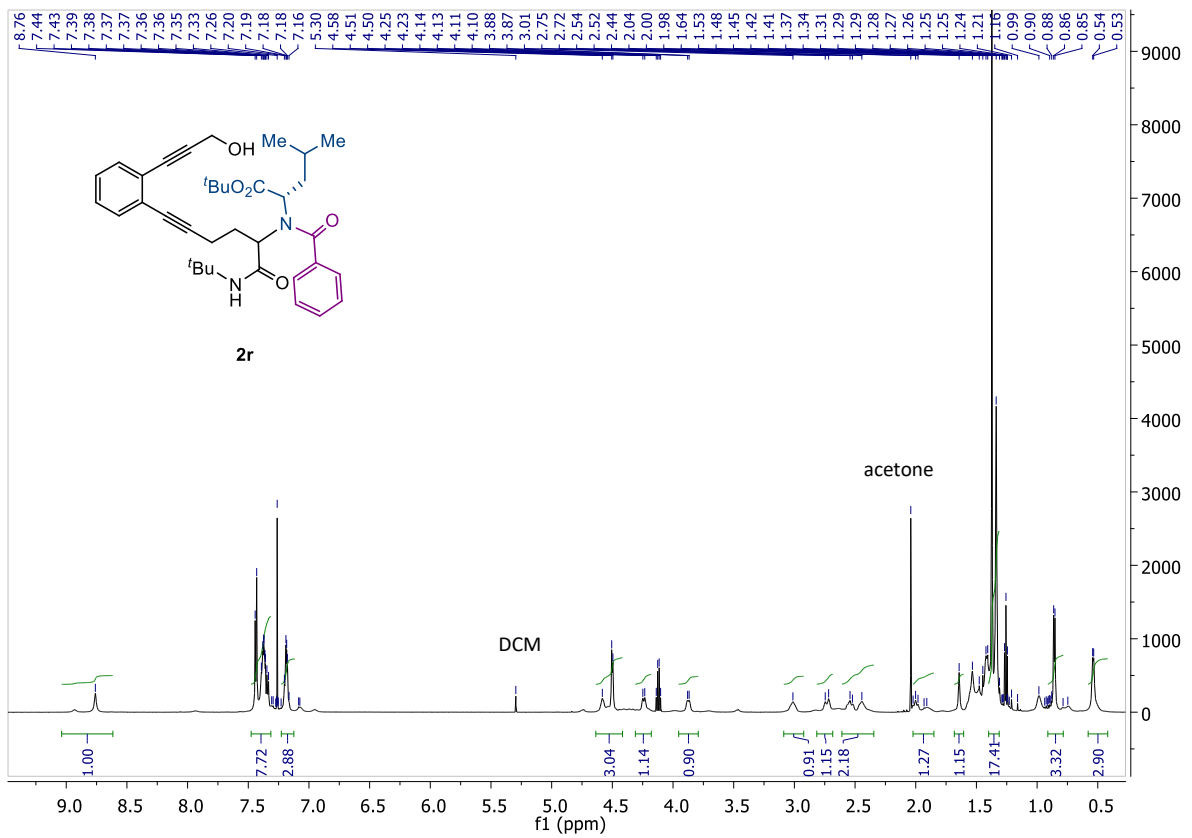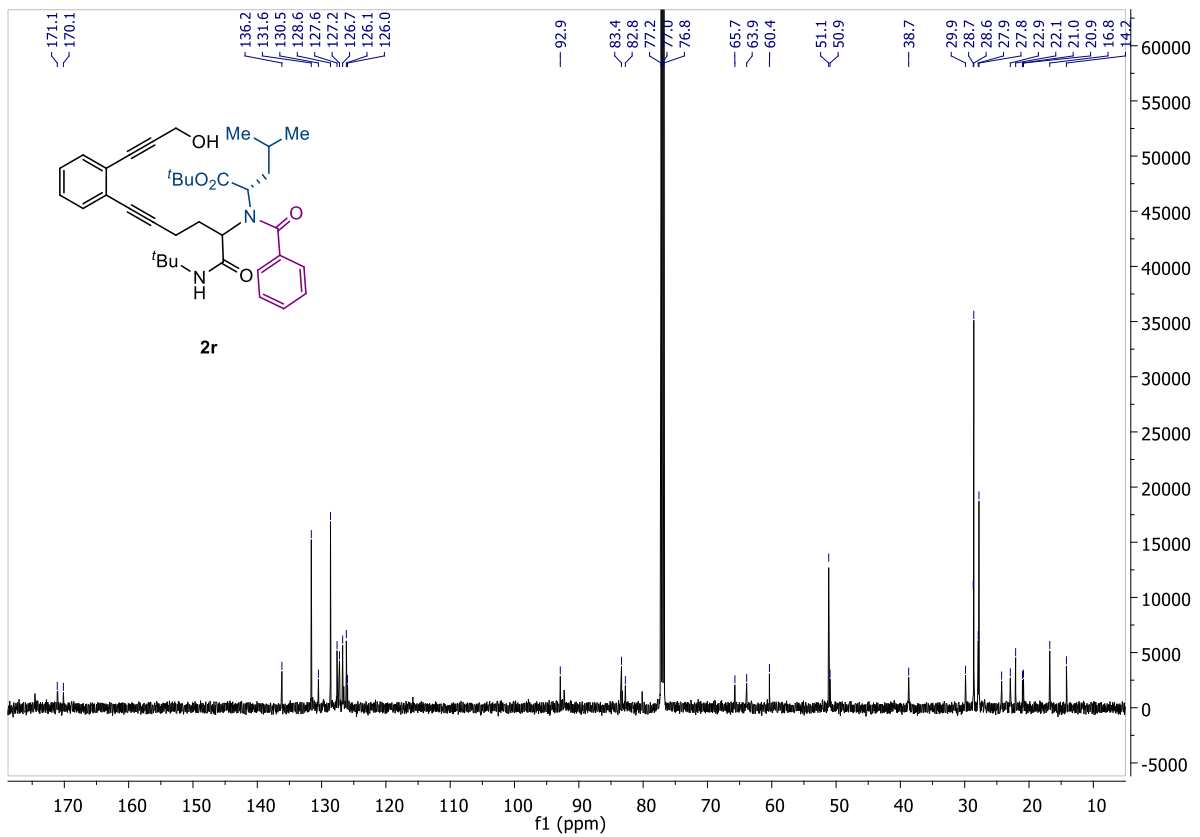



## 7. NMR SPECTRA OF MACROCYCLIC COMPOUNDS 3 AND 4

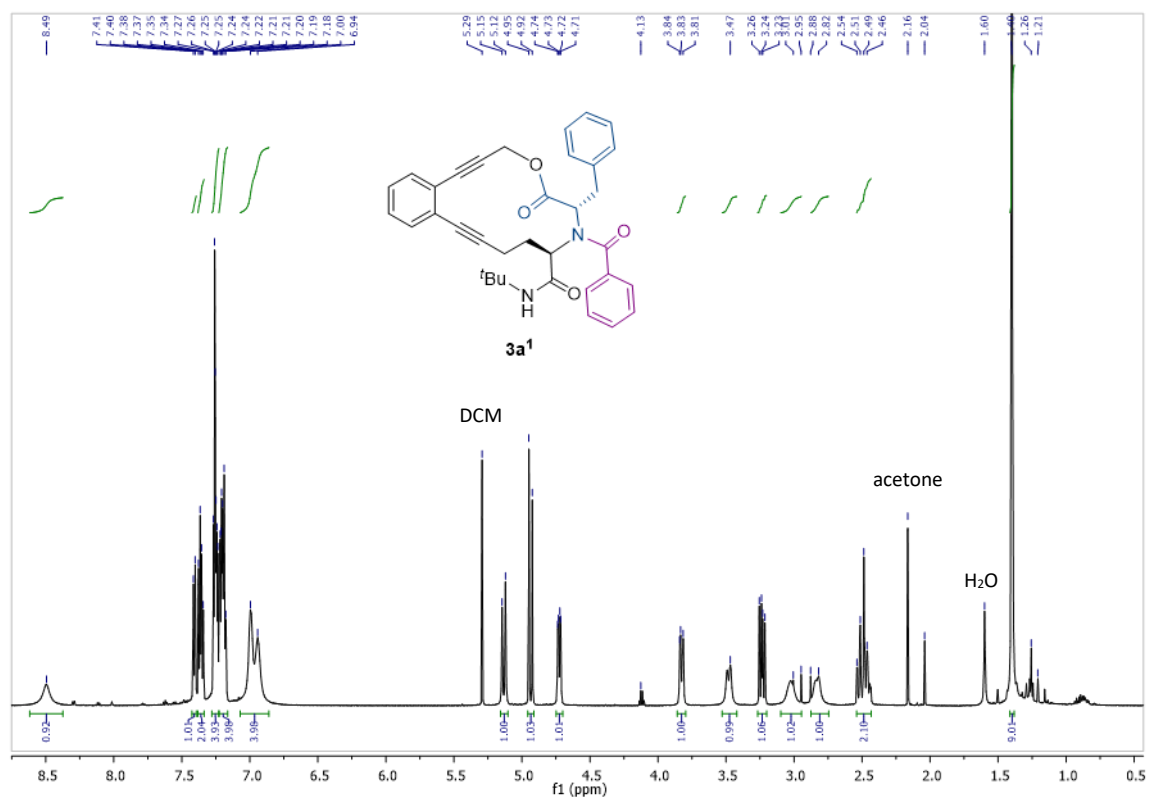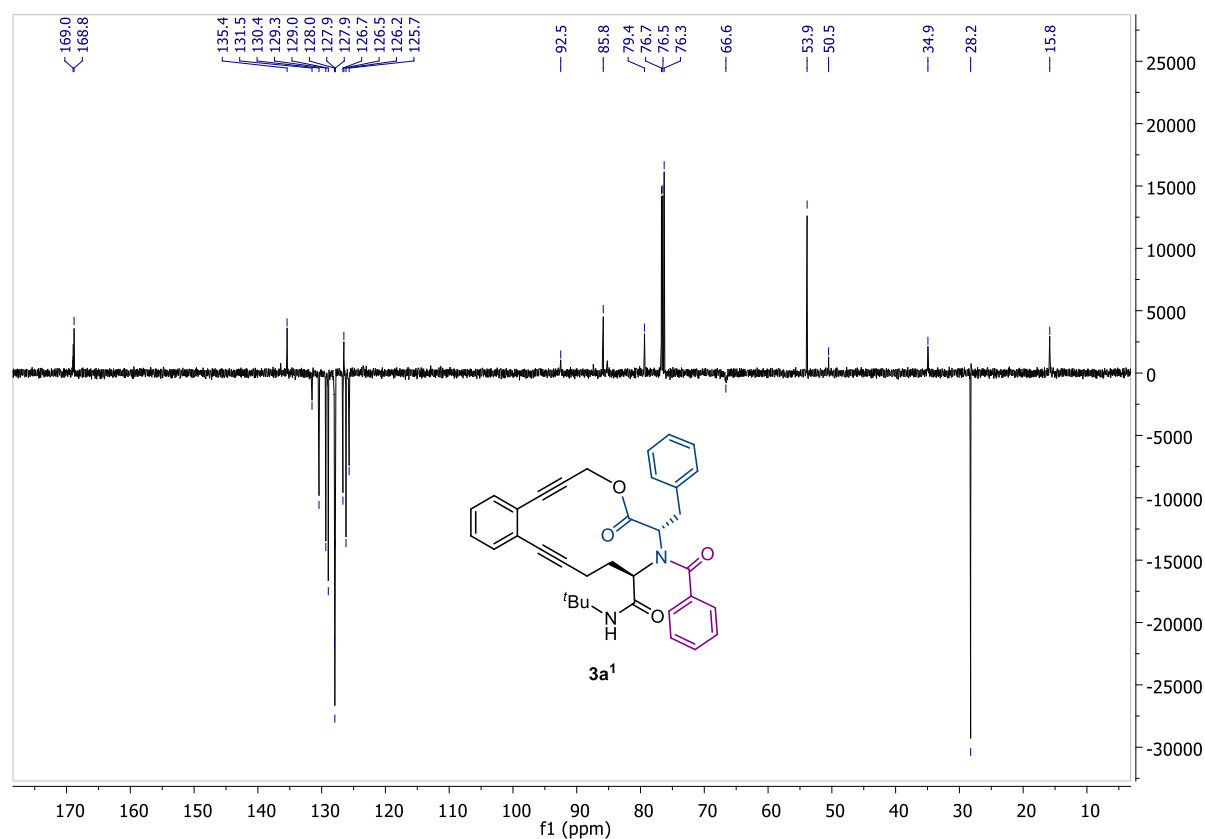

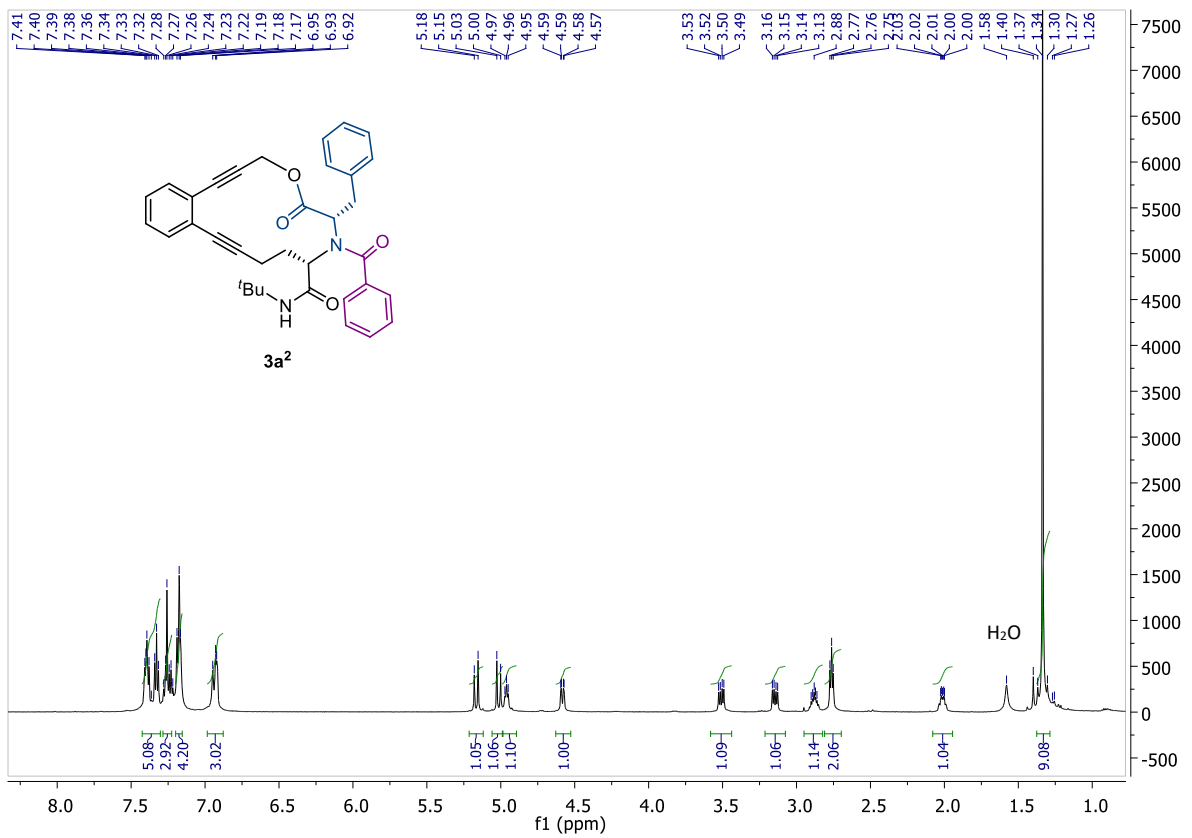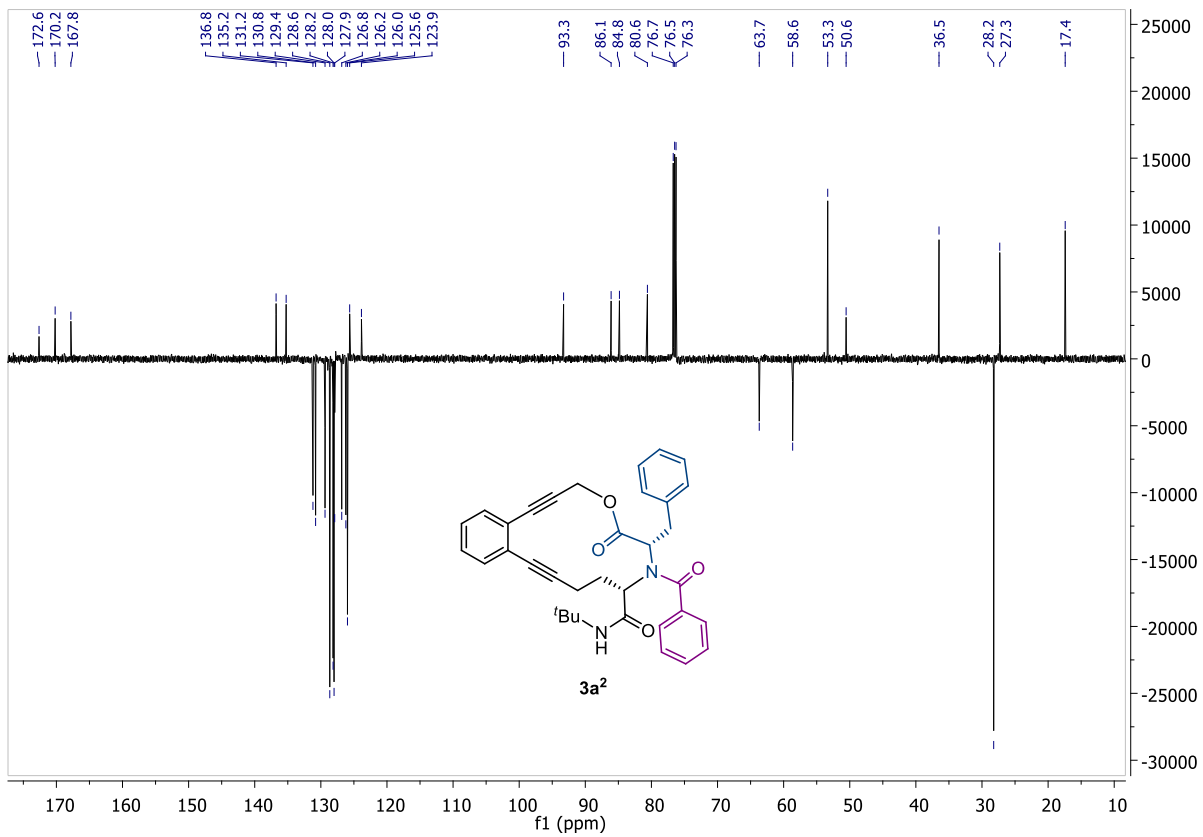

Macrocycle **3b** is isolated as a mixture of diastereoisomers

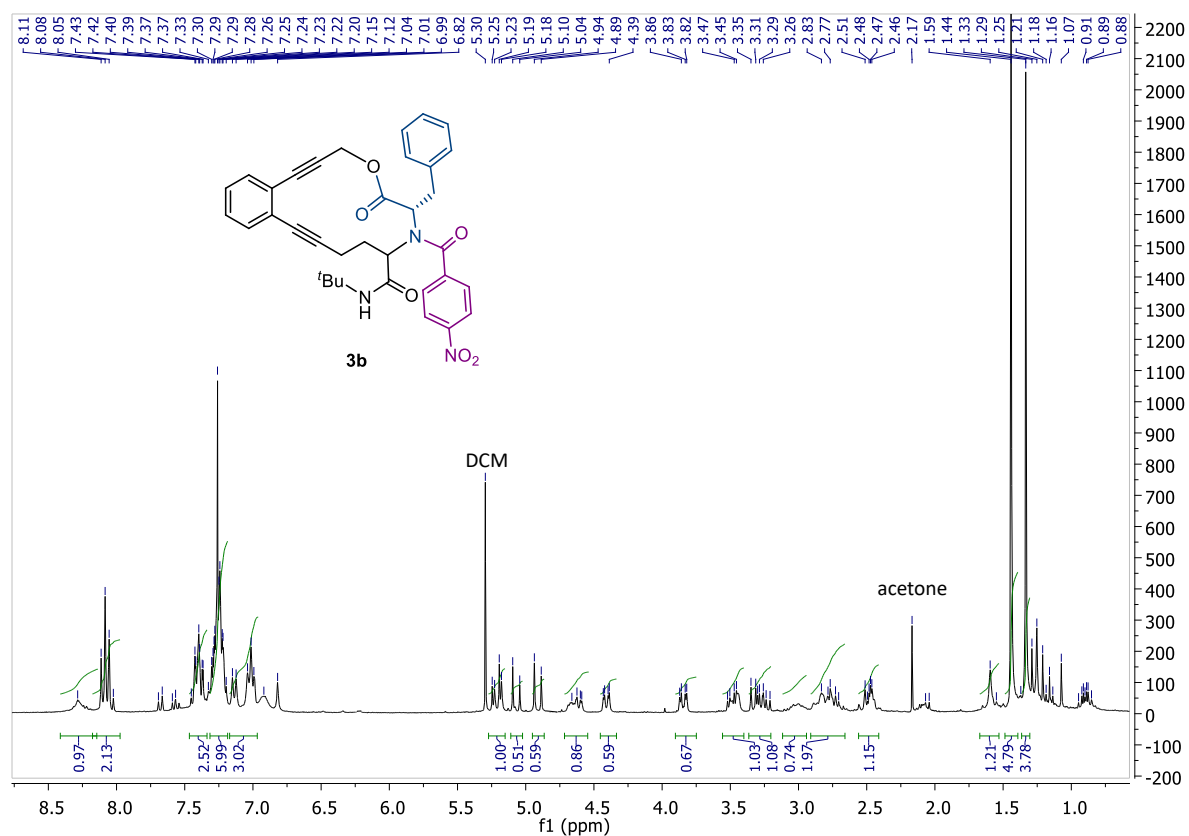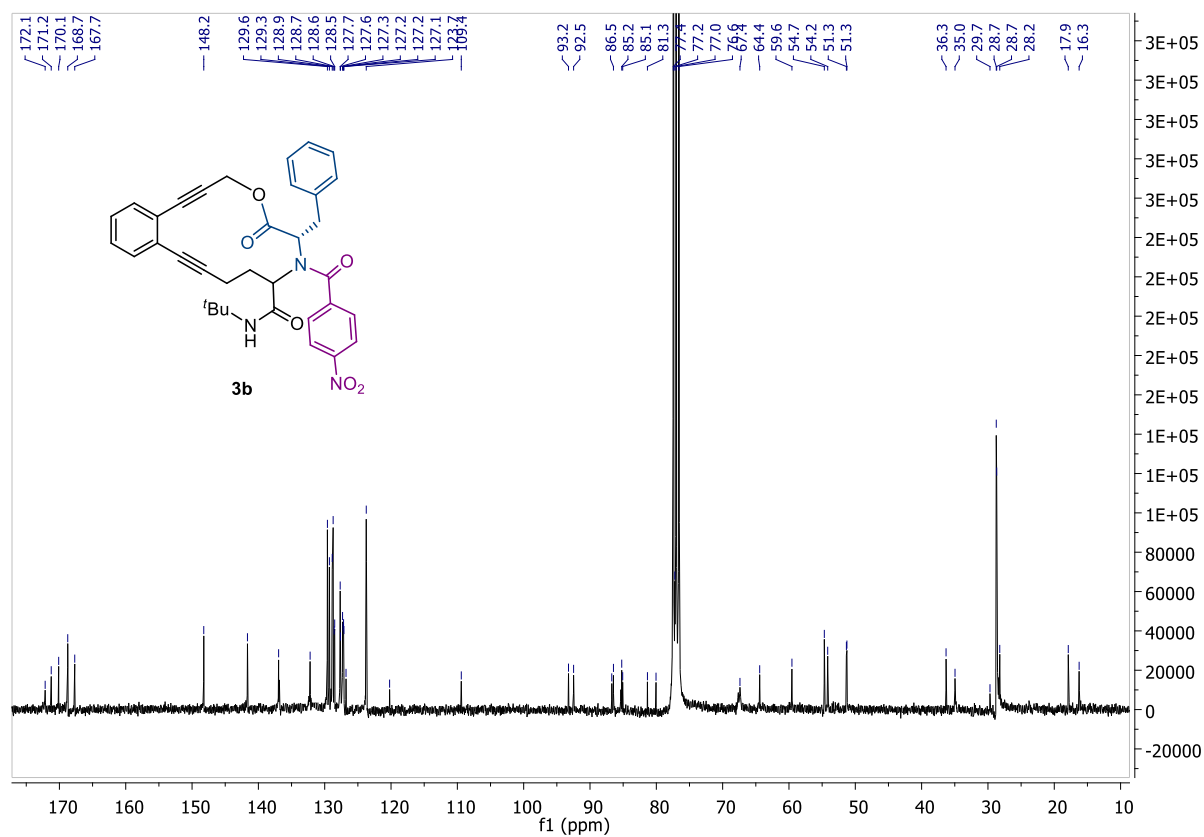

Macrocycle **3c** is isolated as a mixture of diastereoisomers

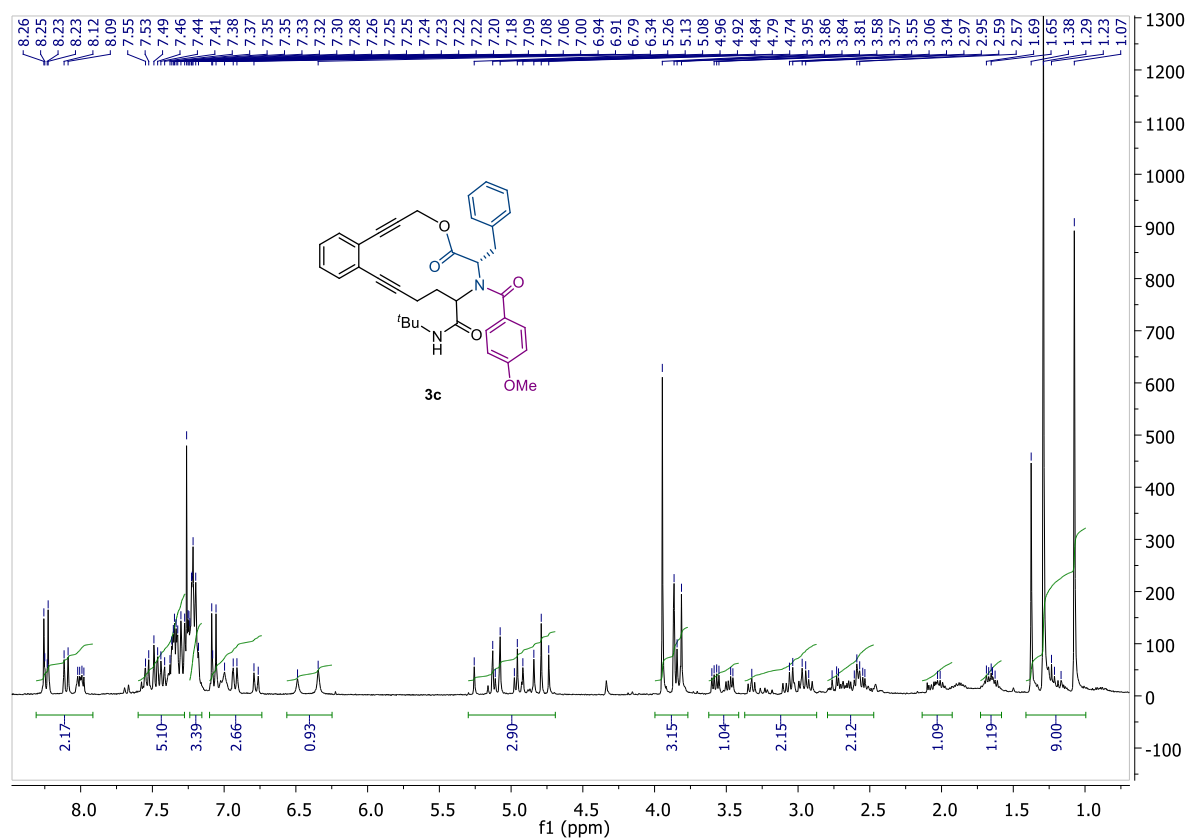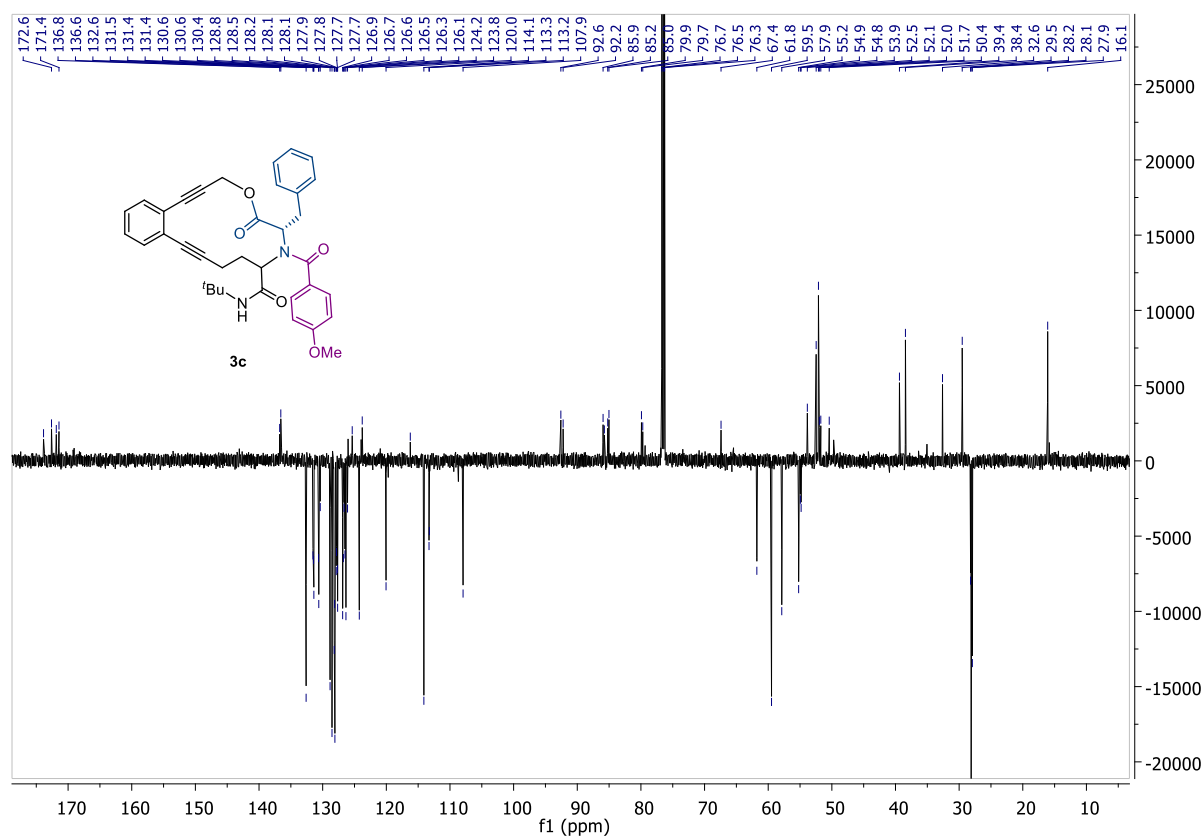

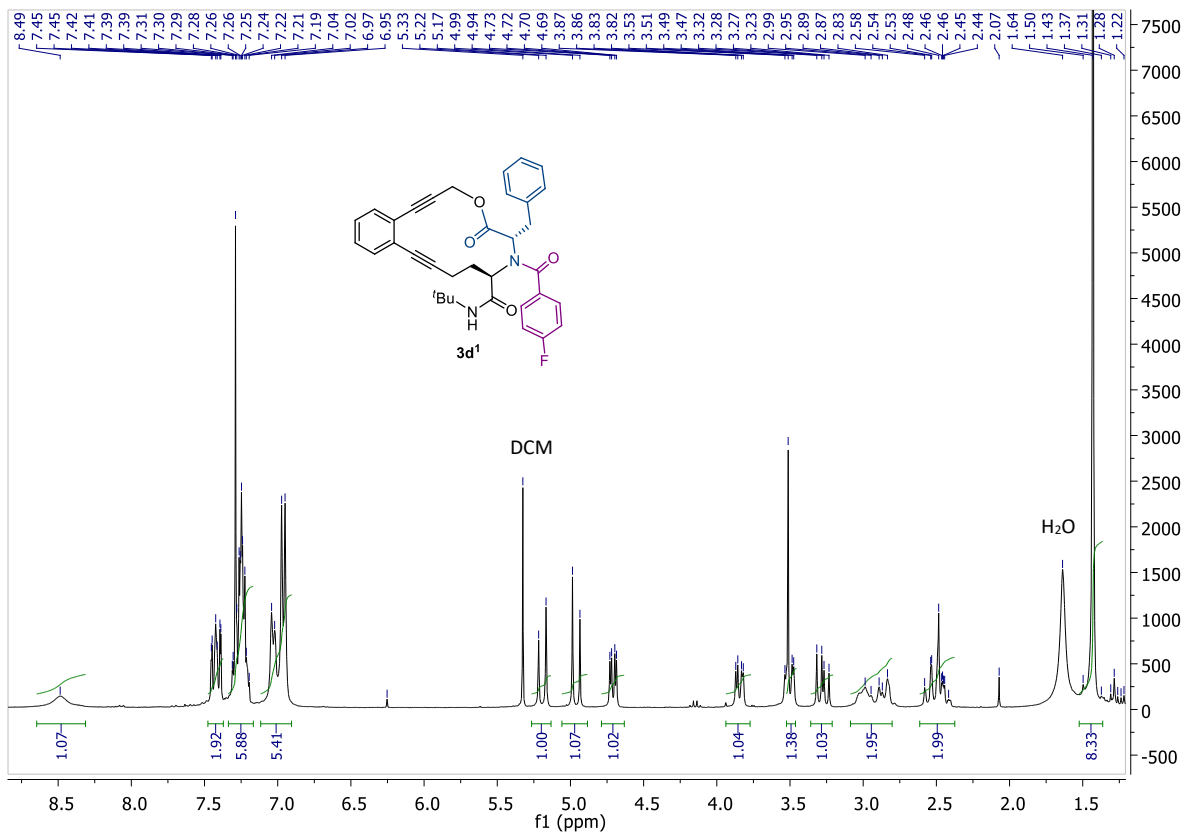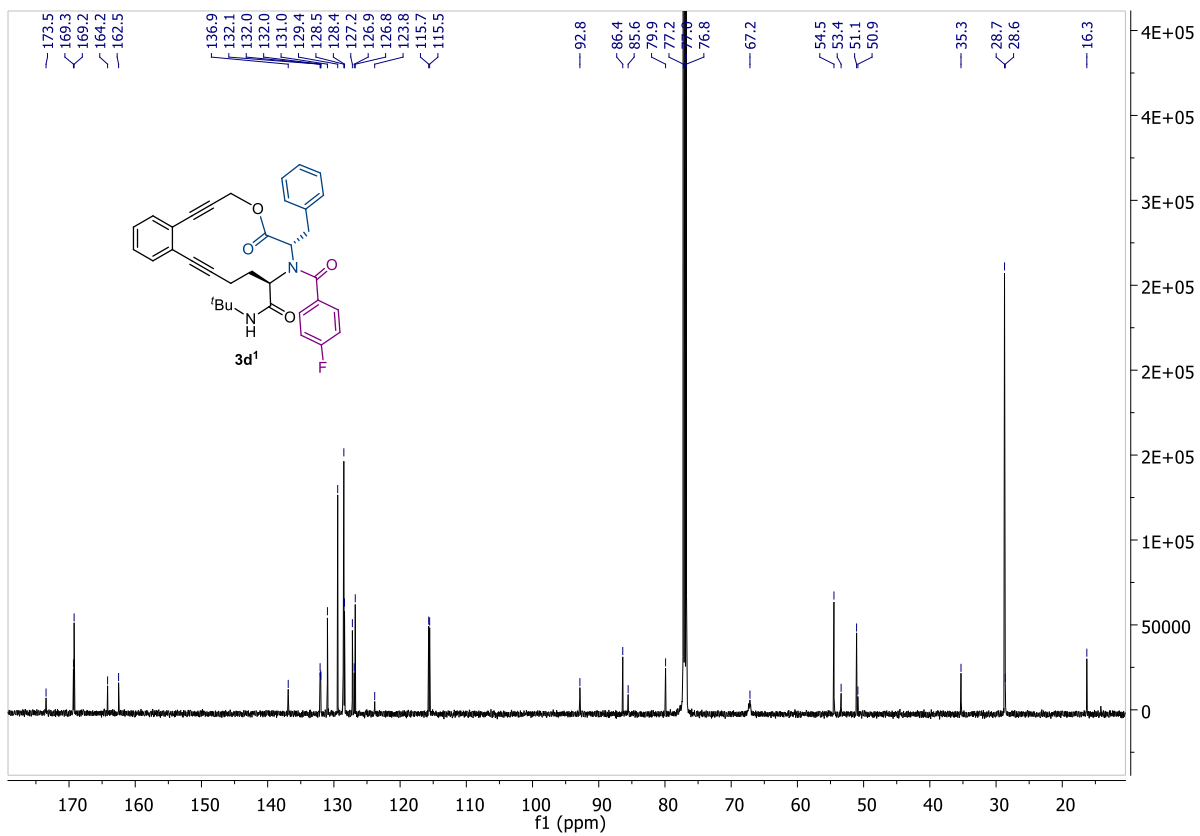

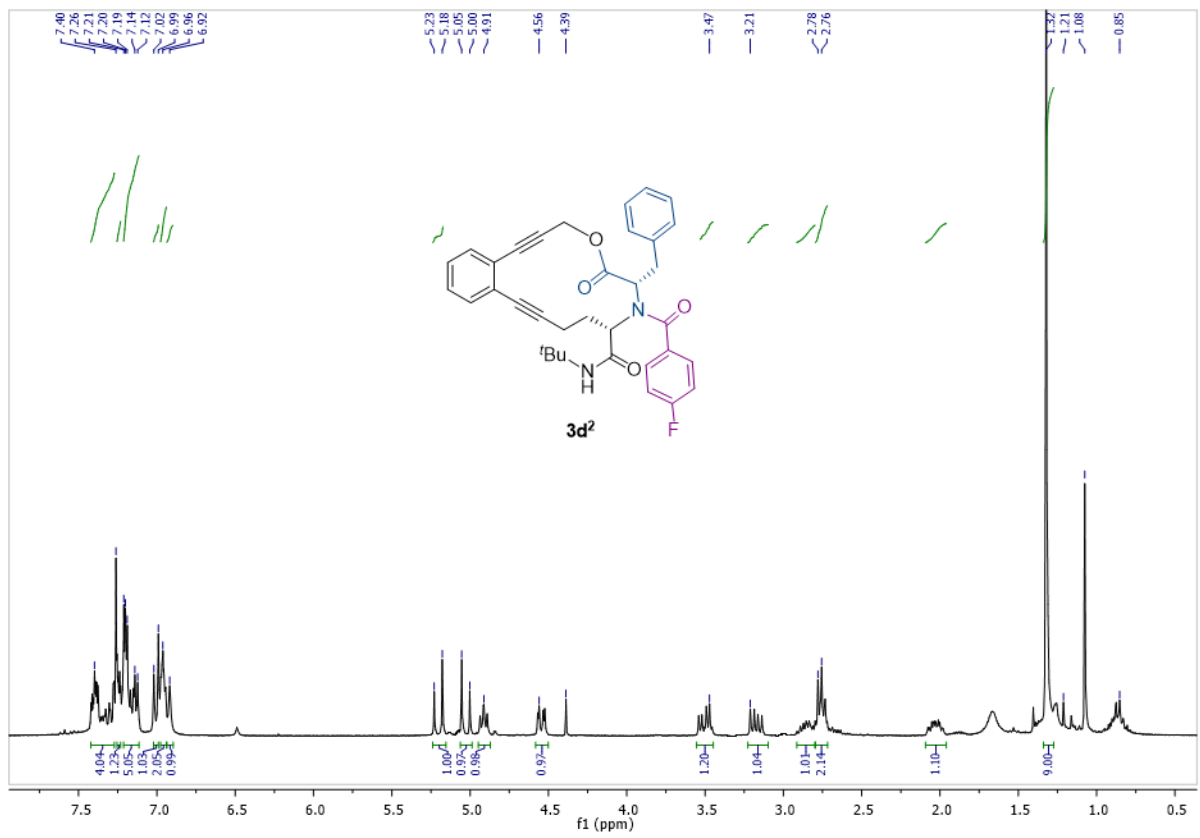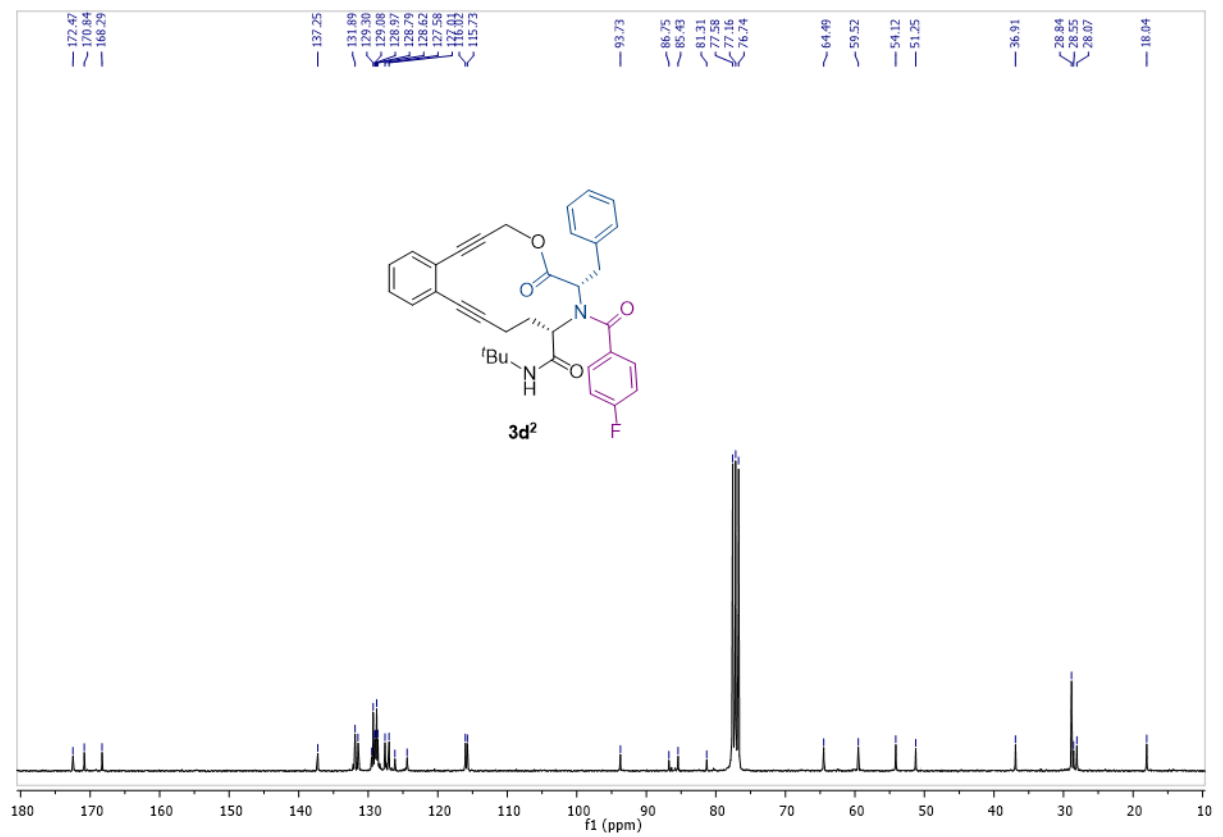

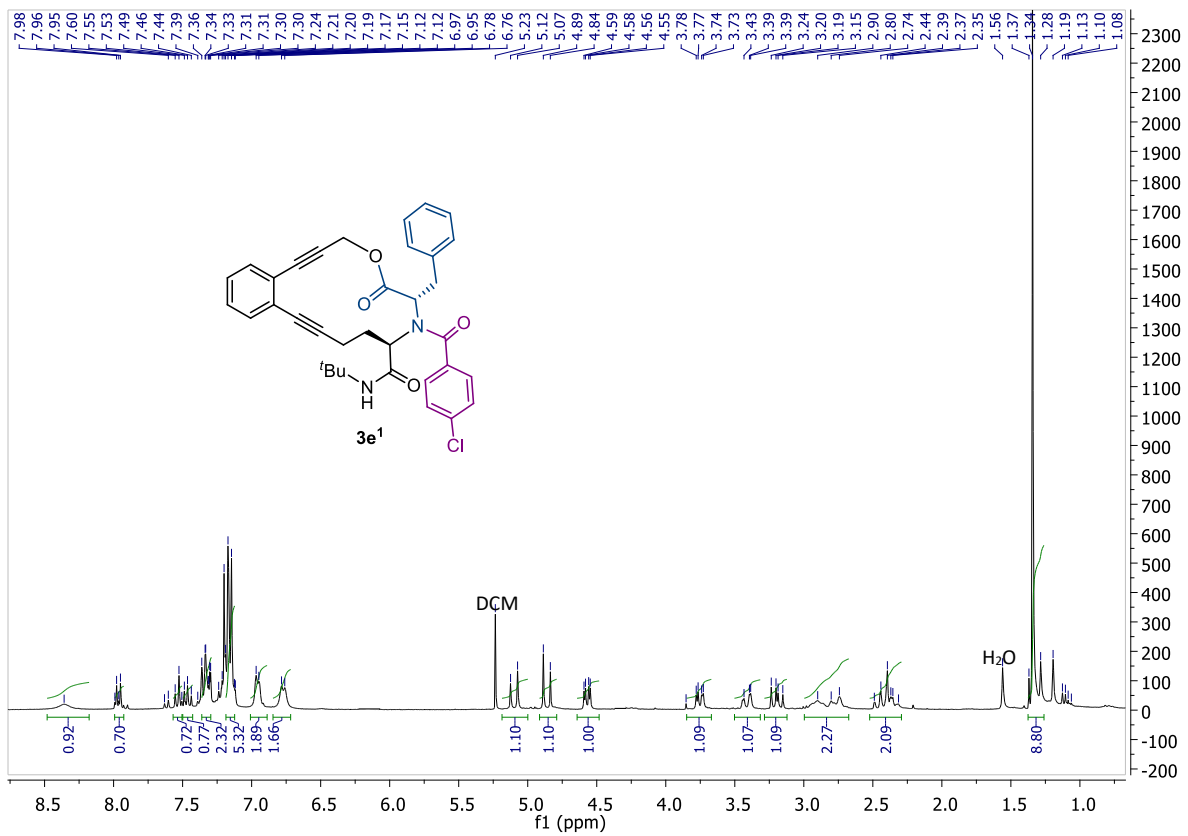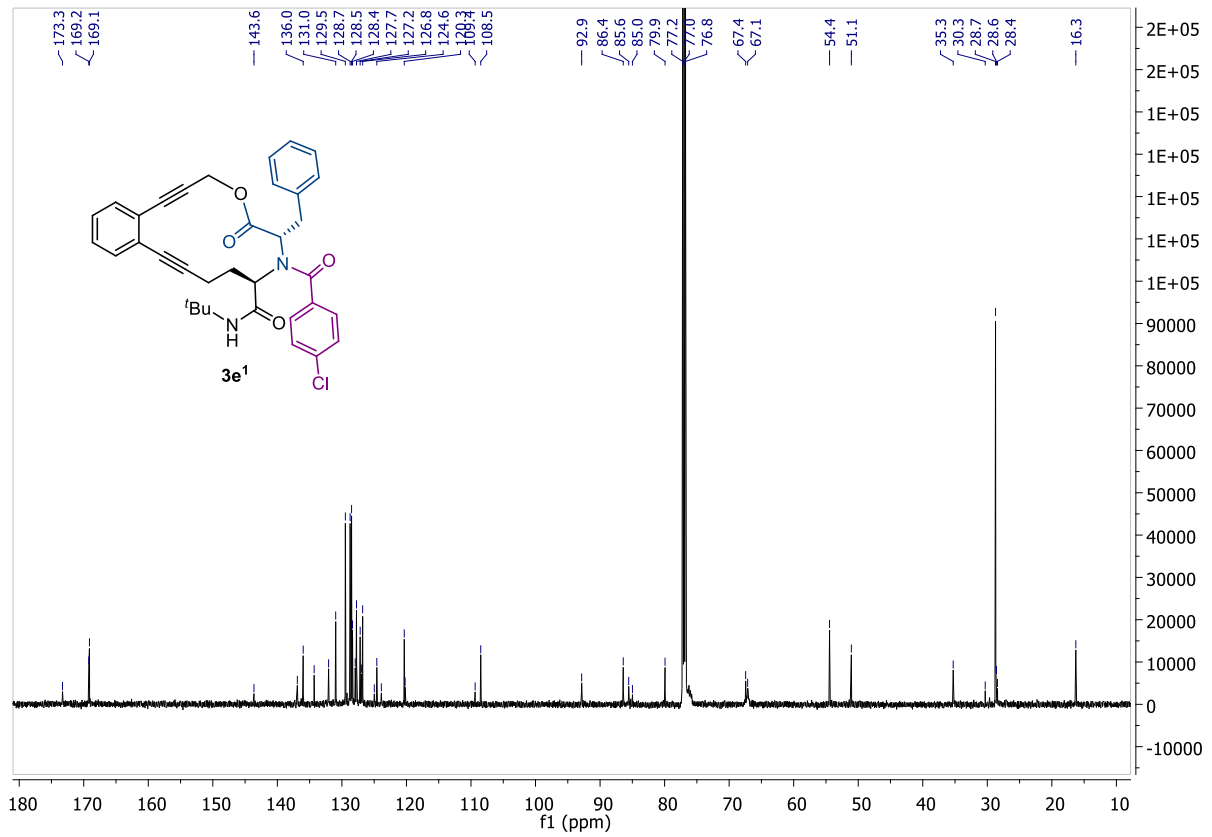

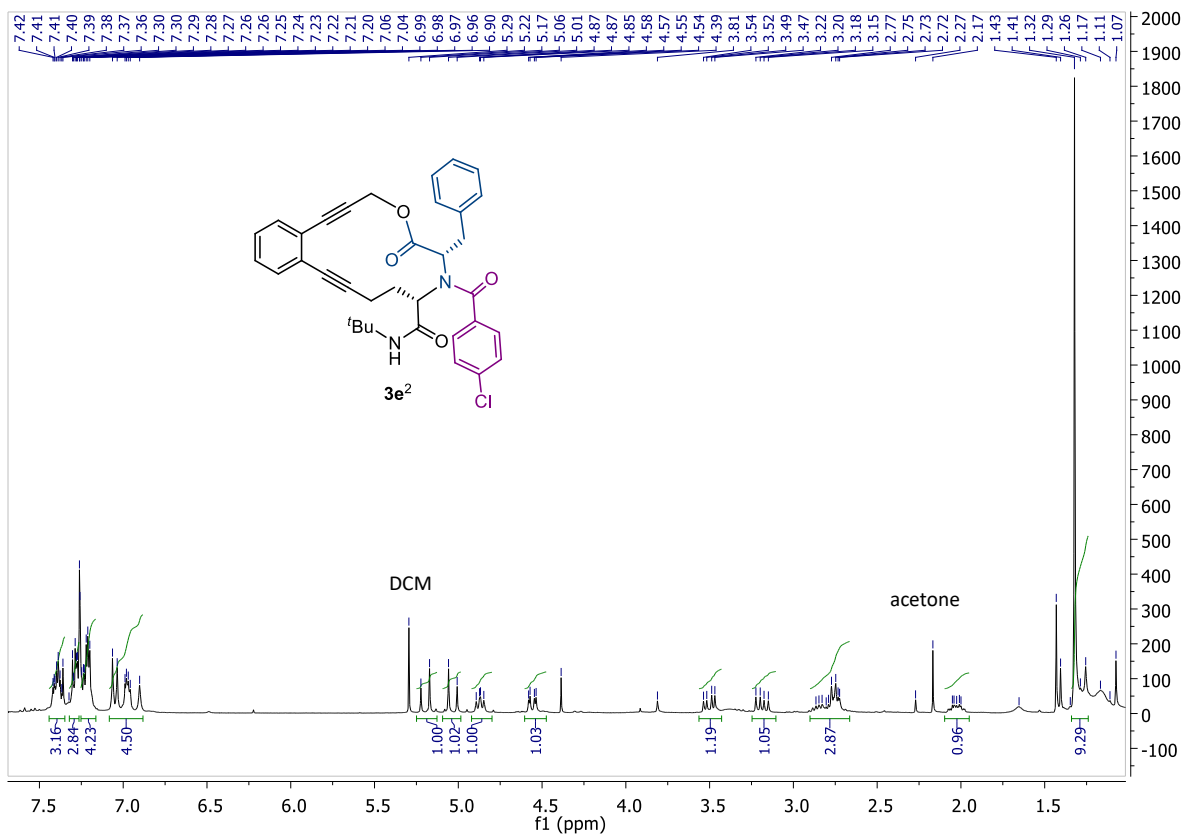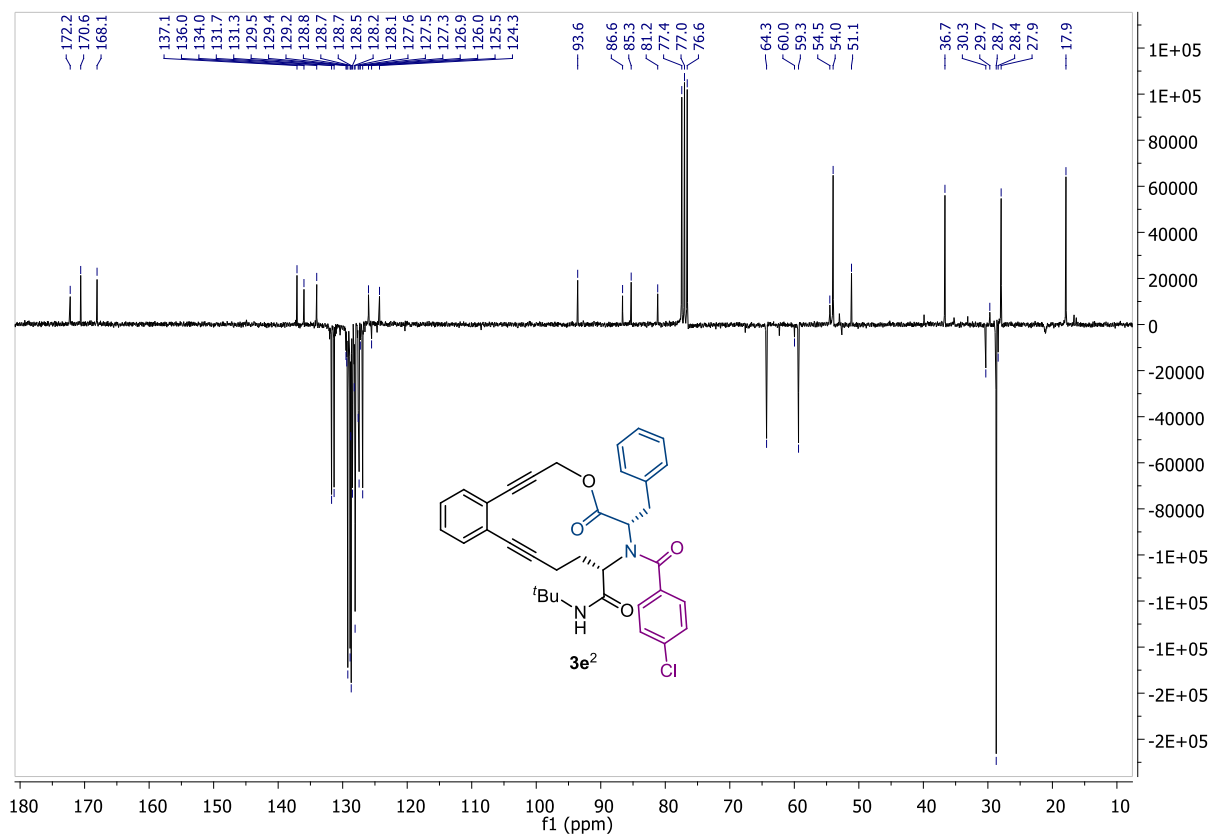



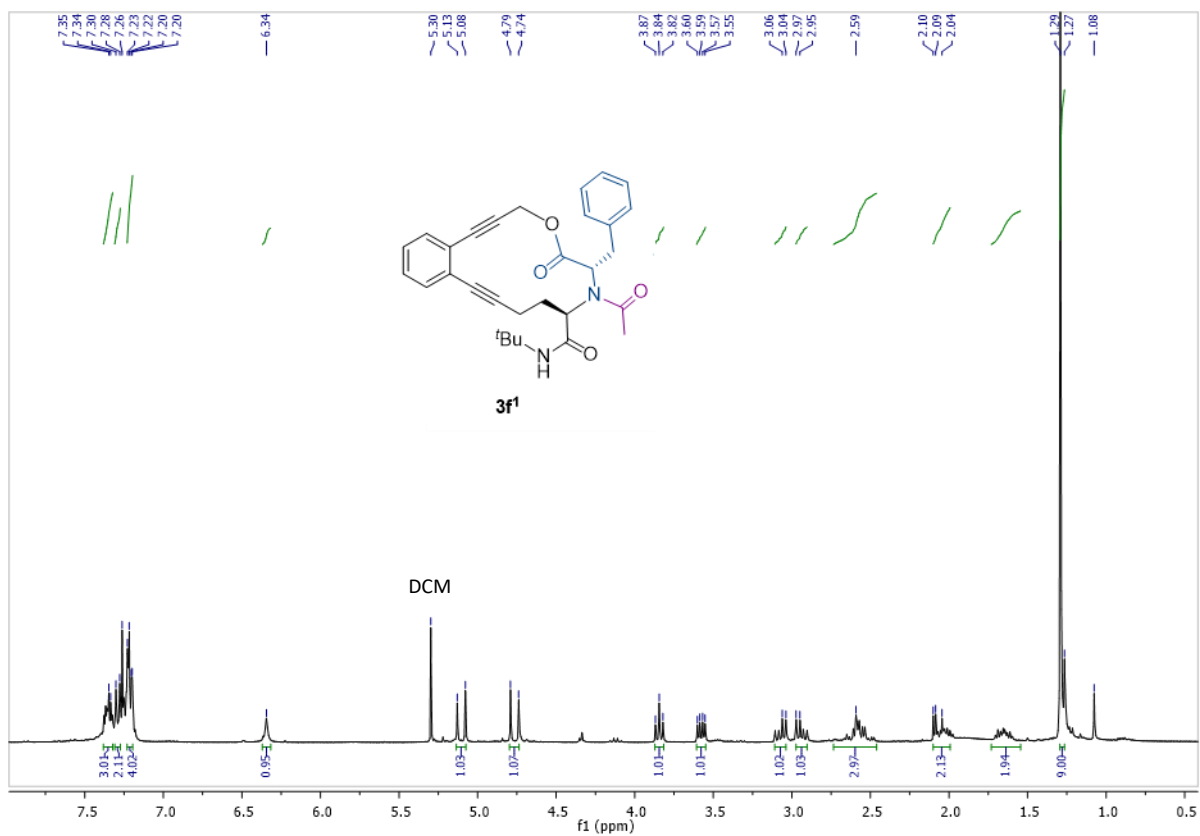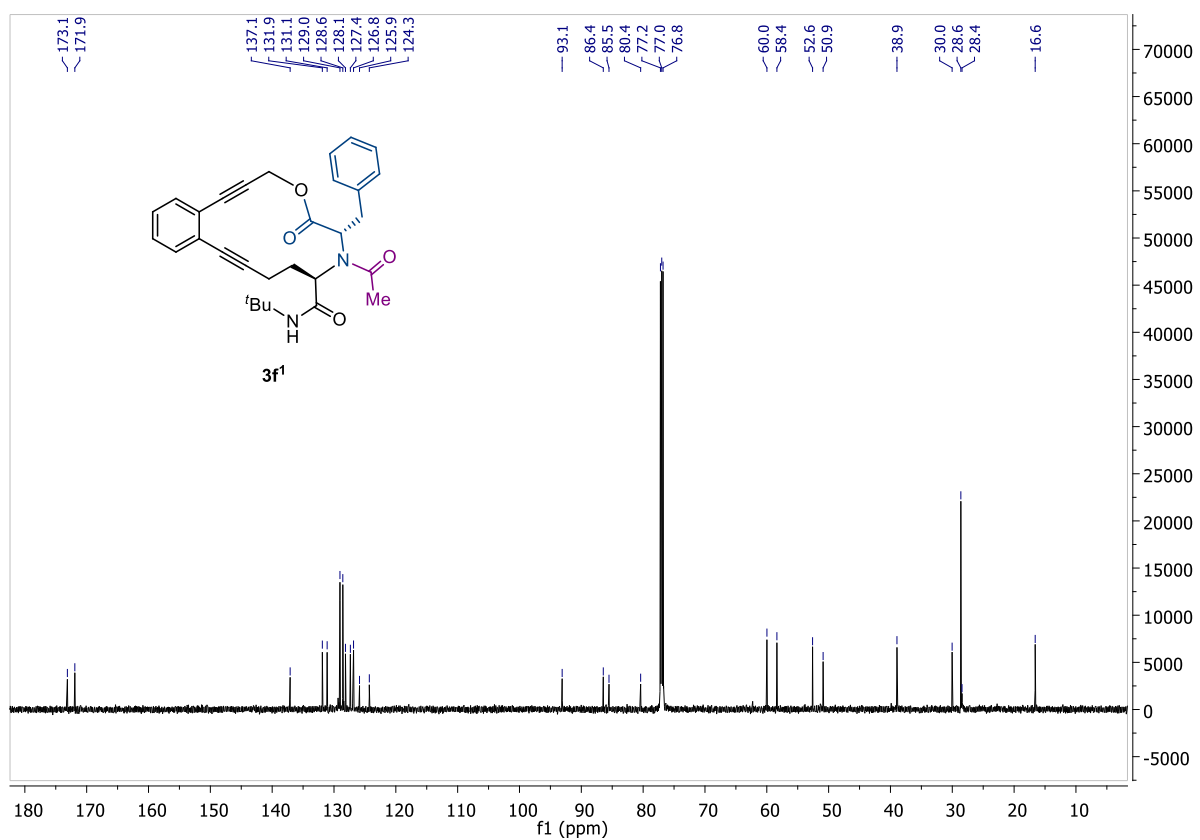

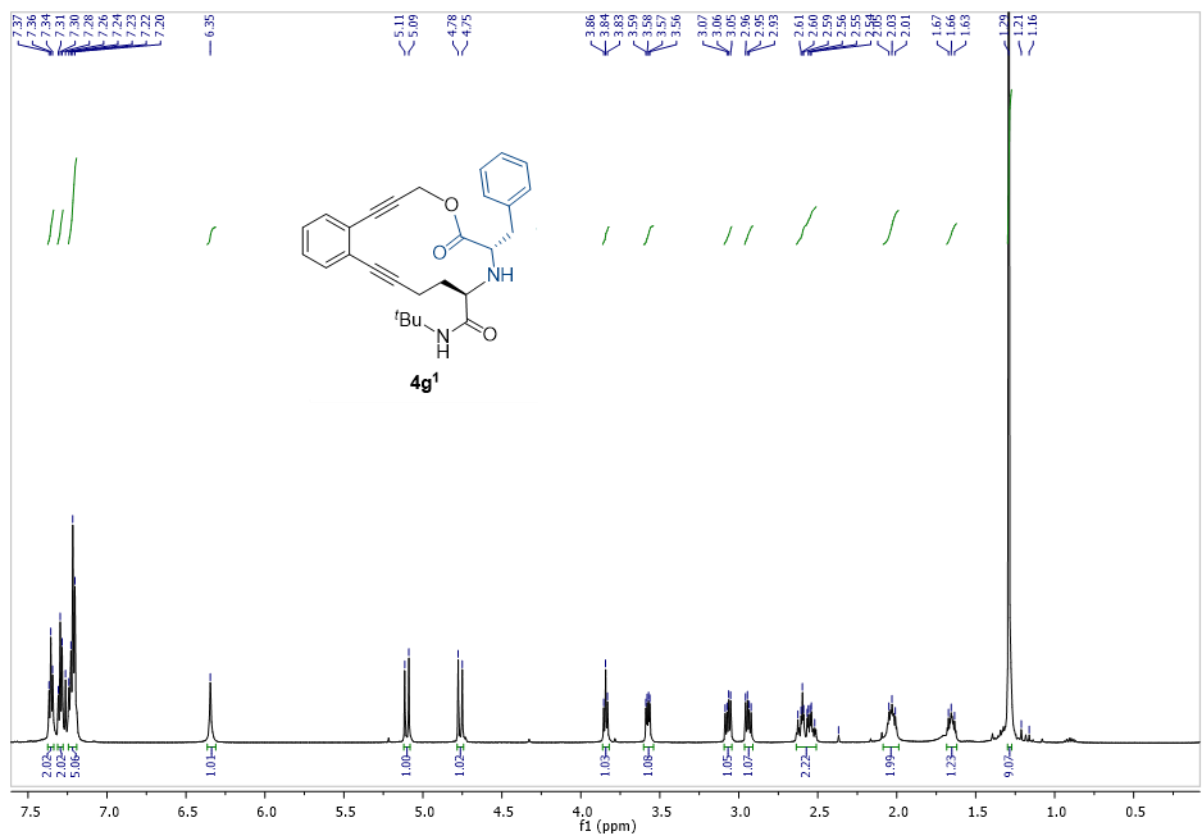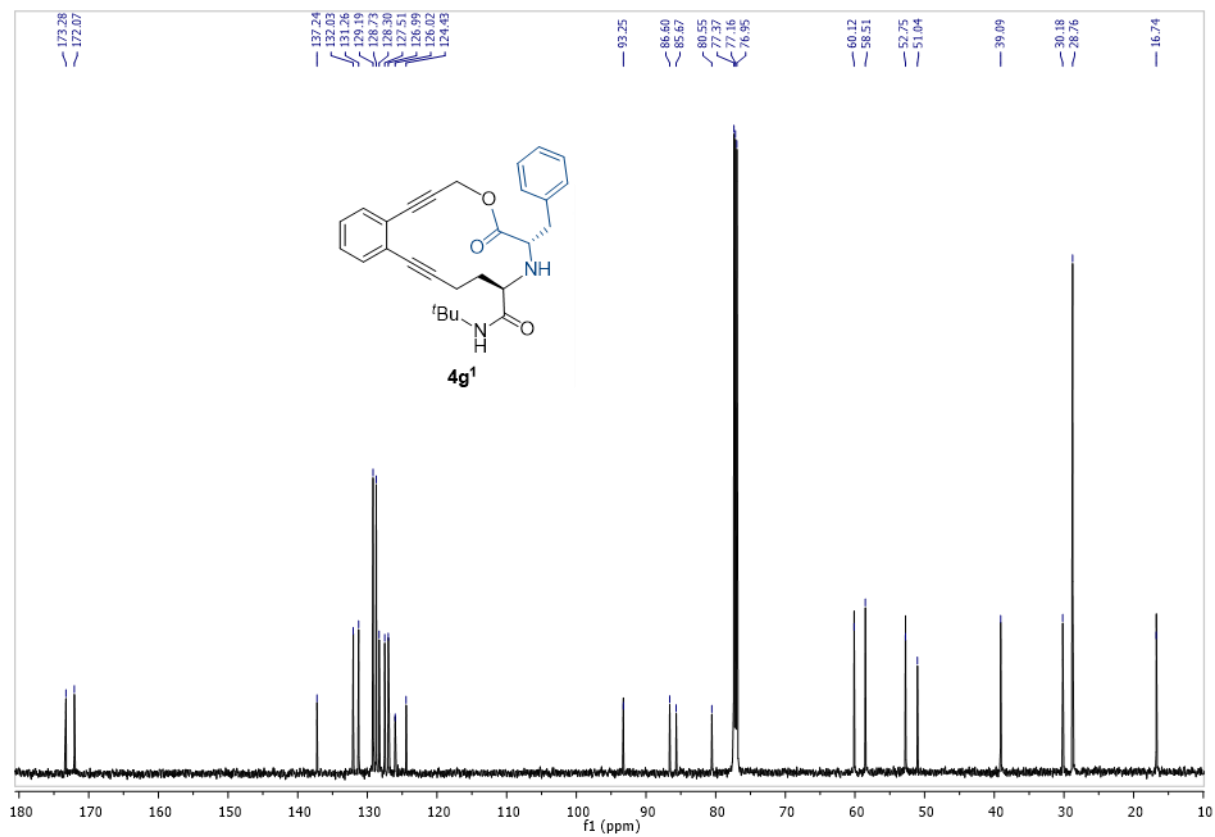

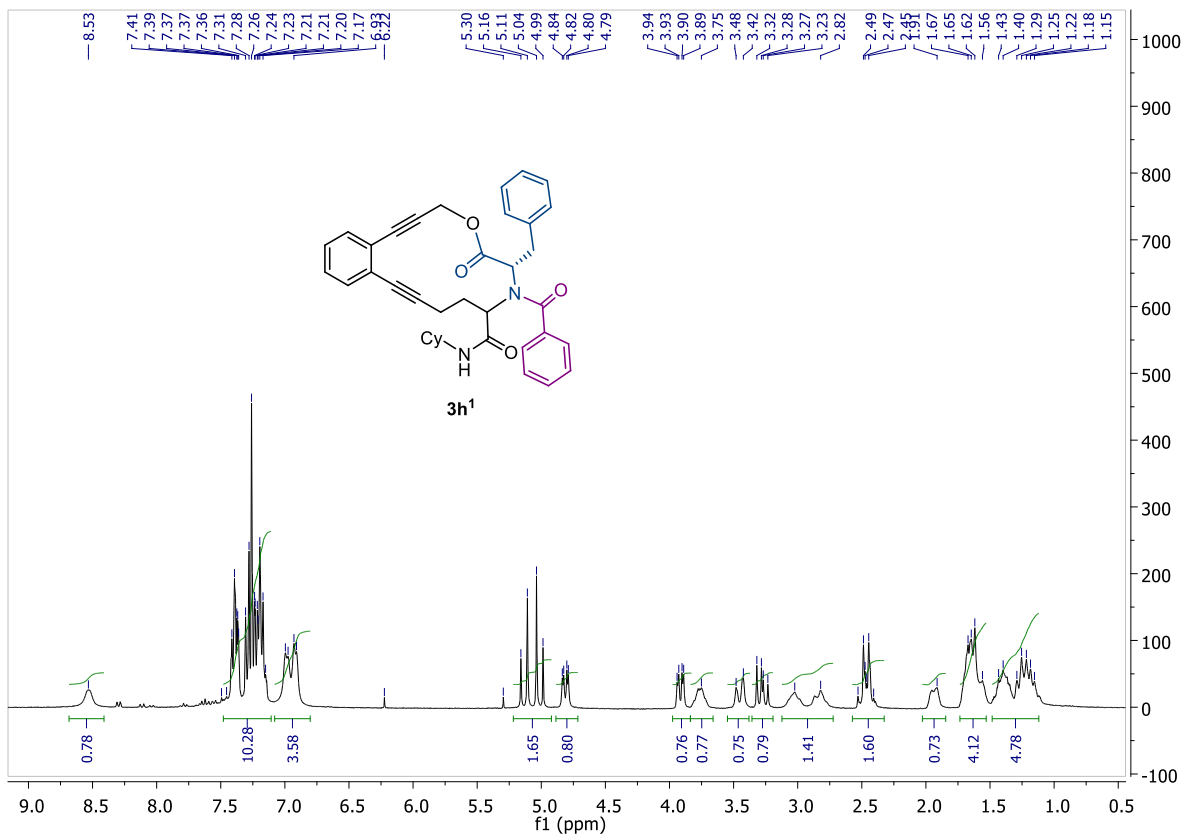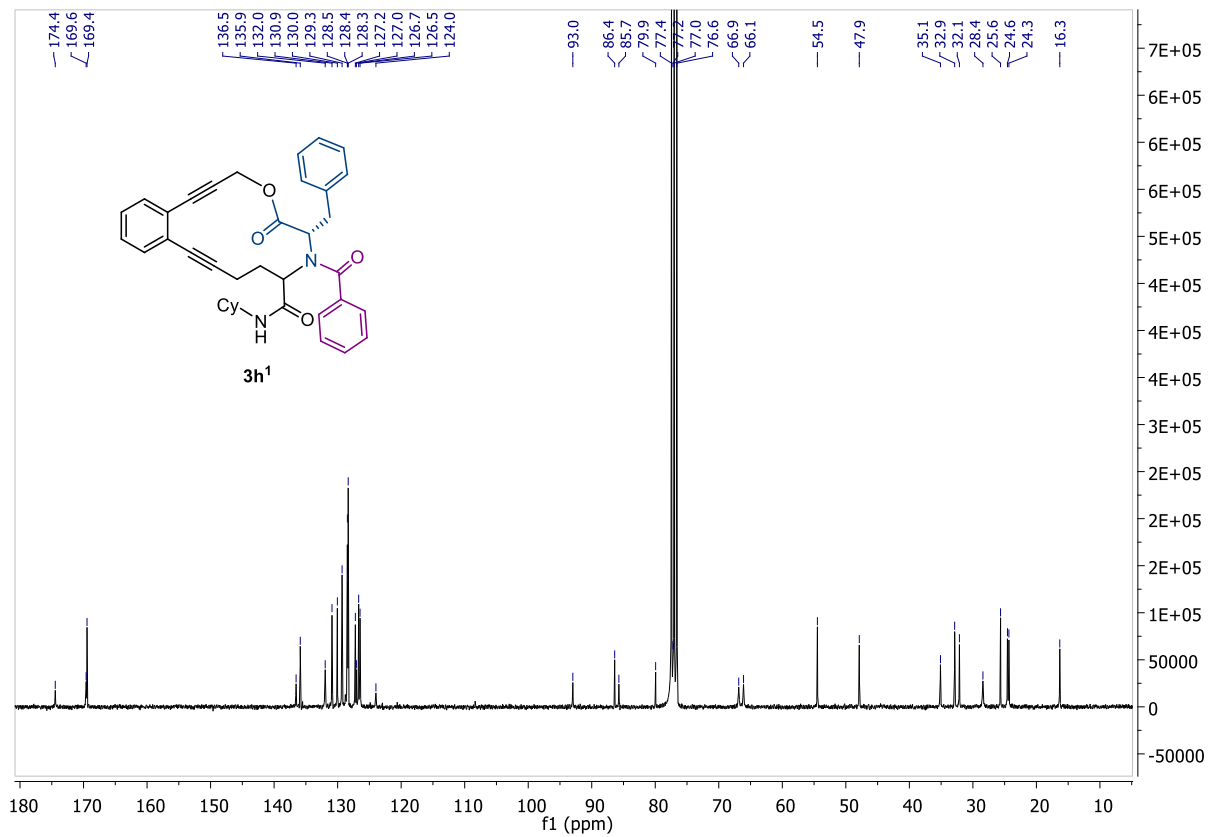

Macrocycle **3i** is isolated as a mixture of diastereoisomers

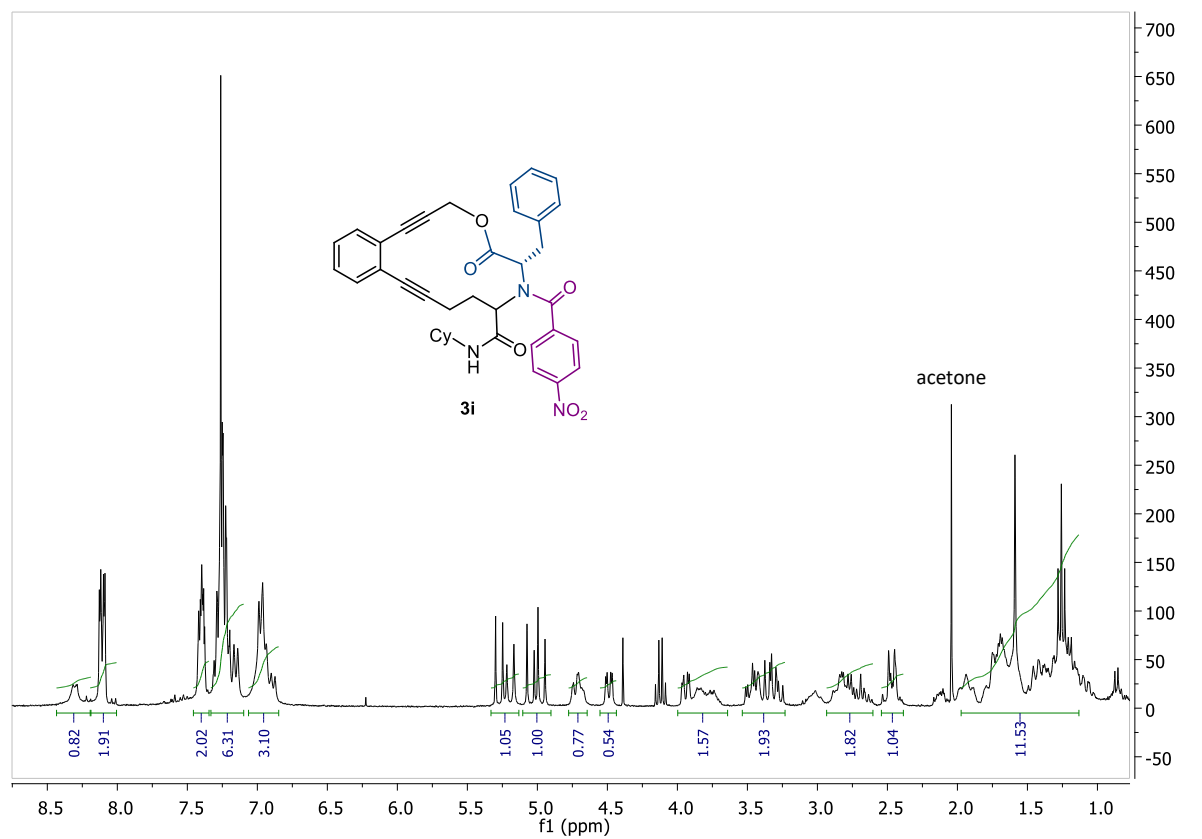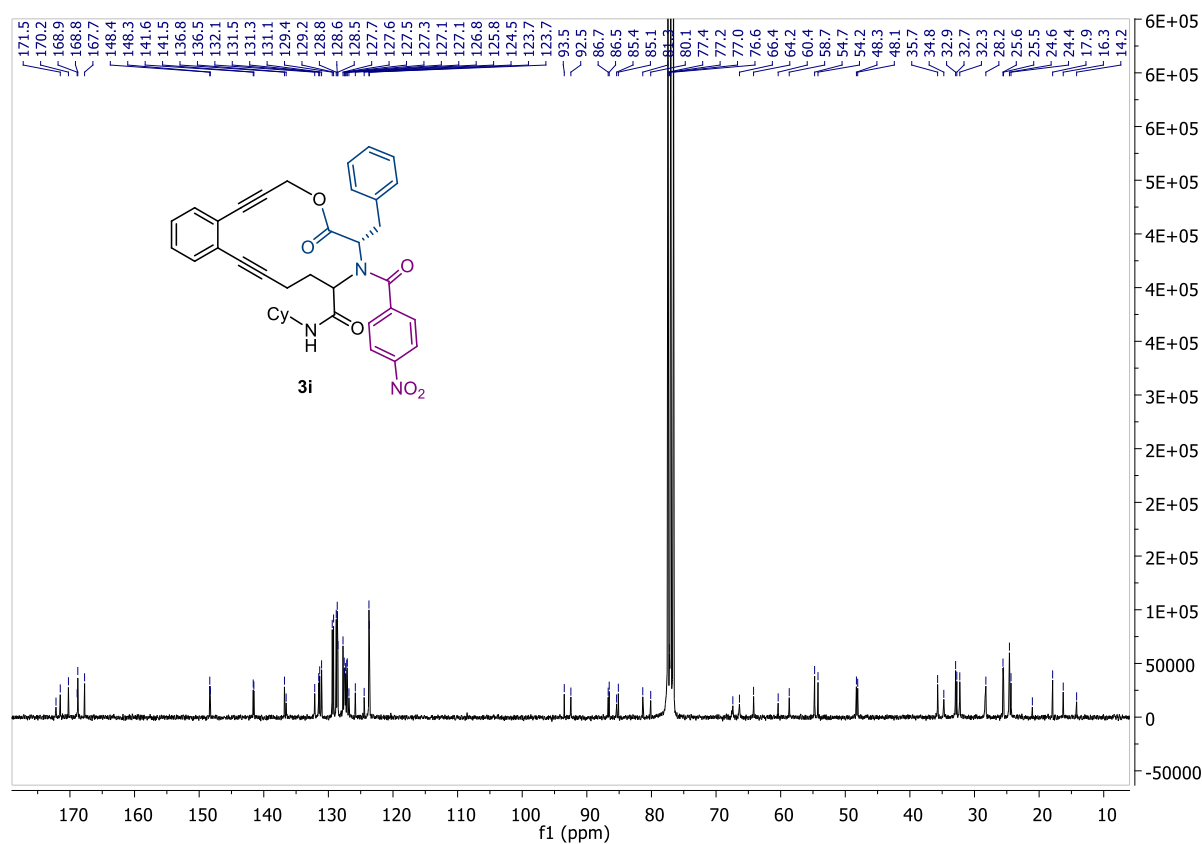

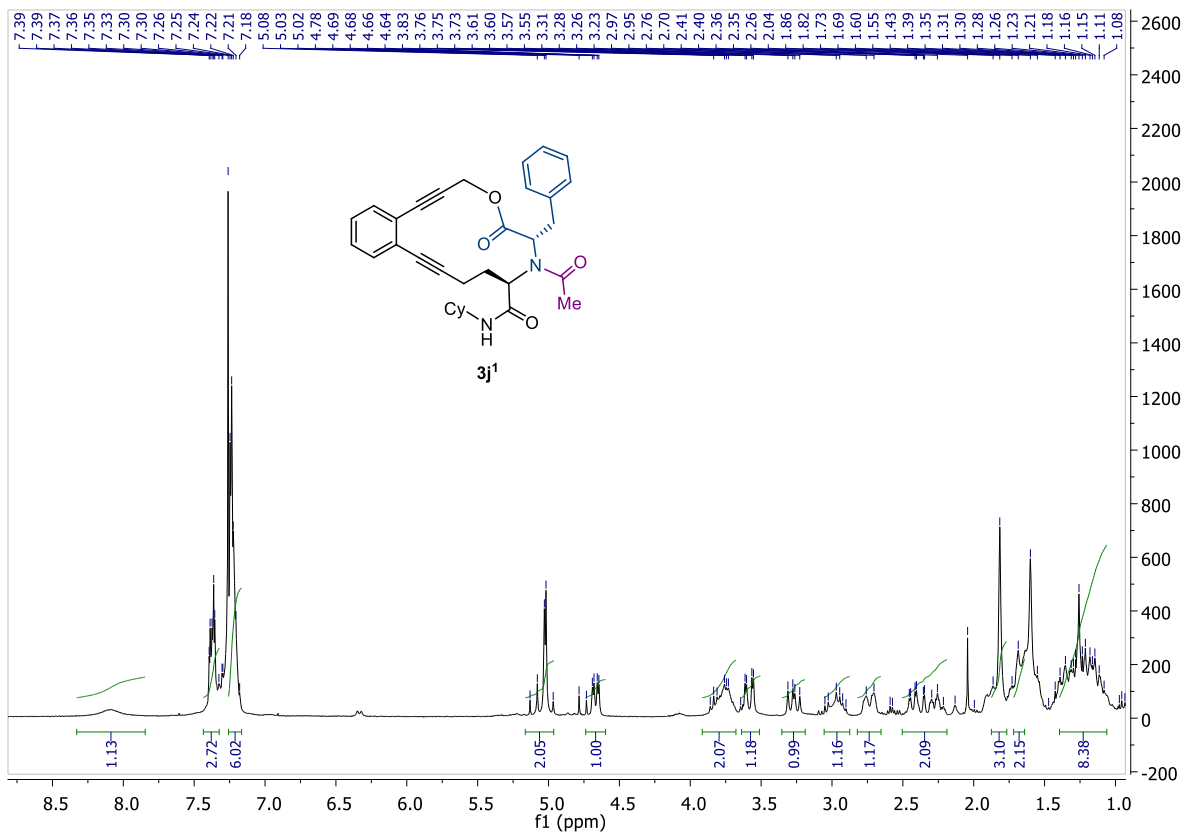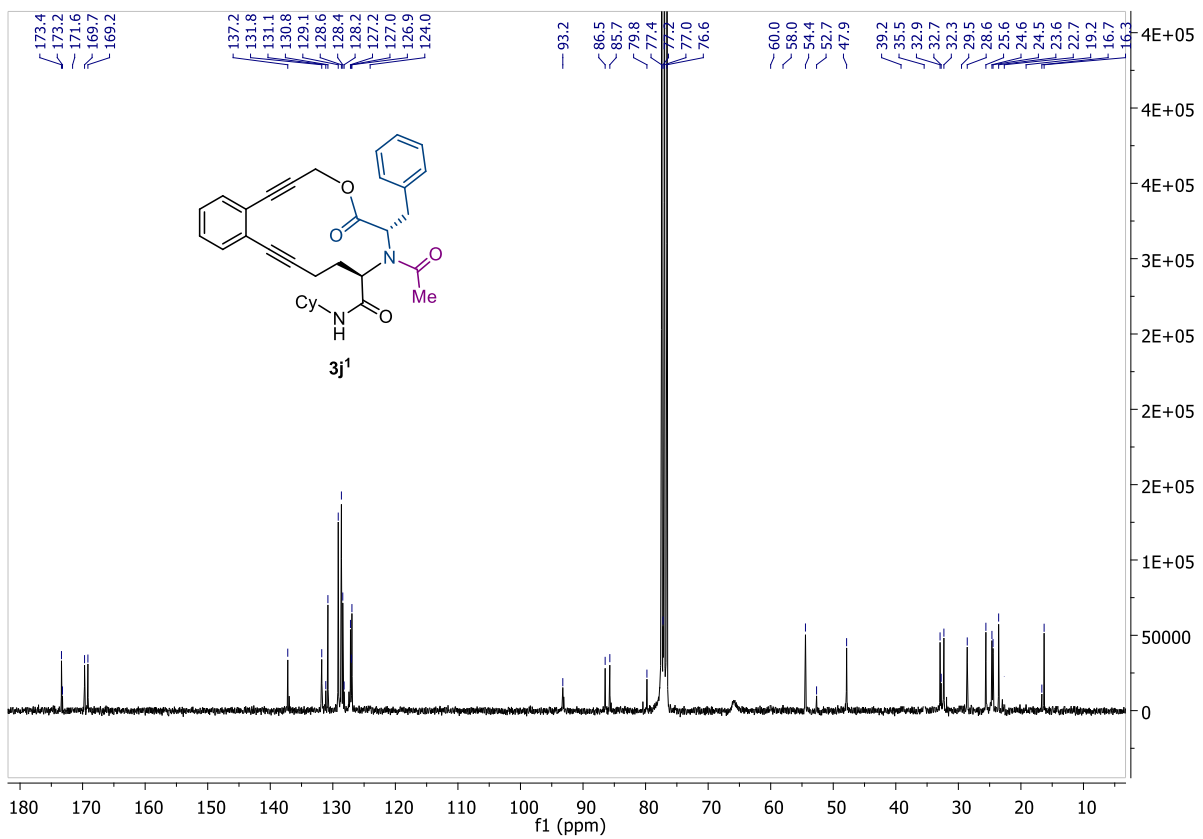

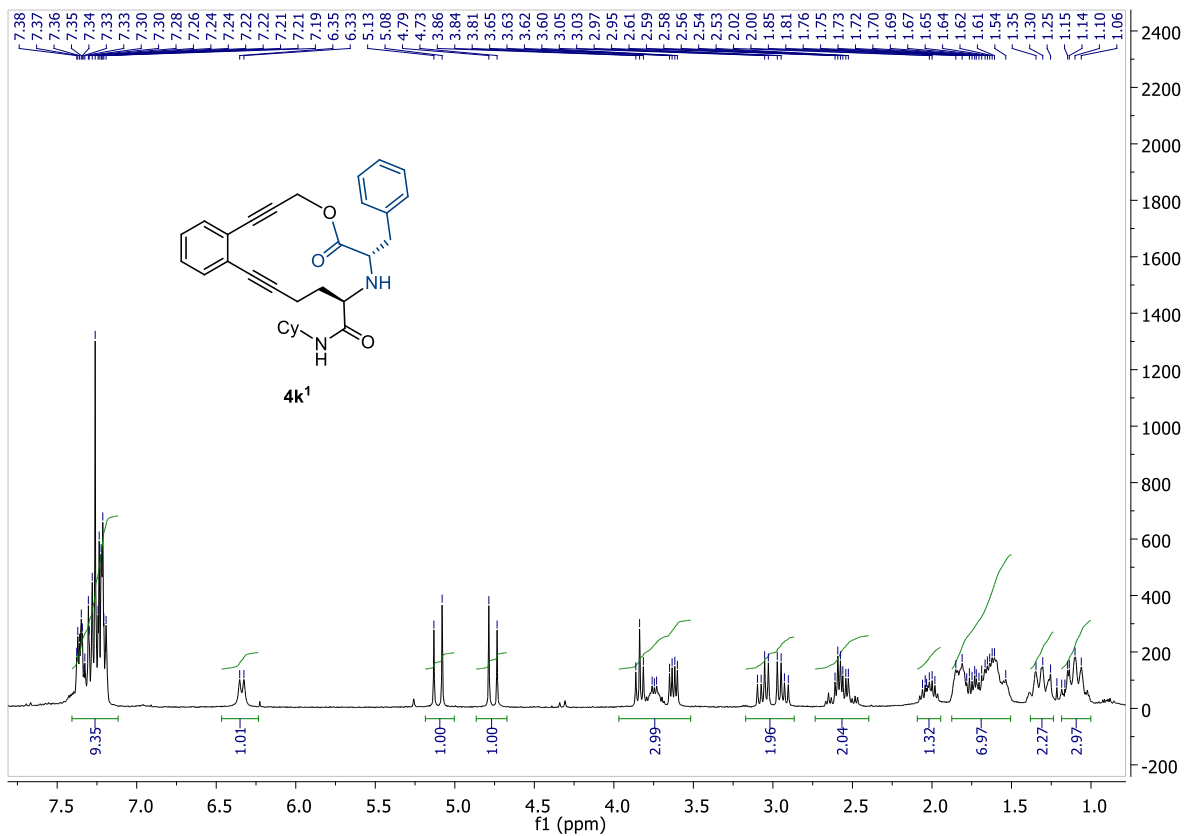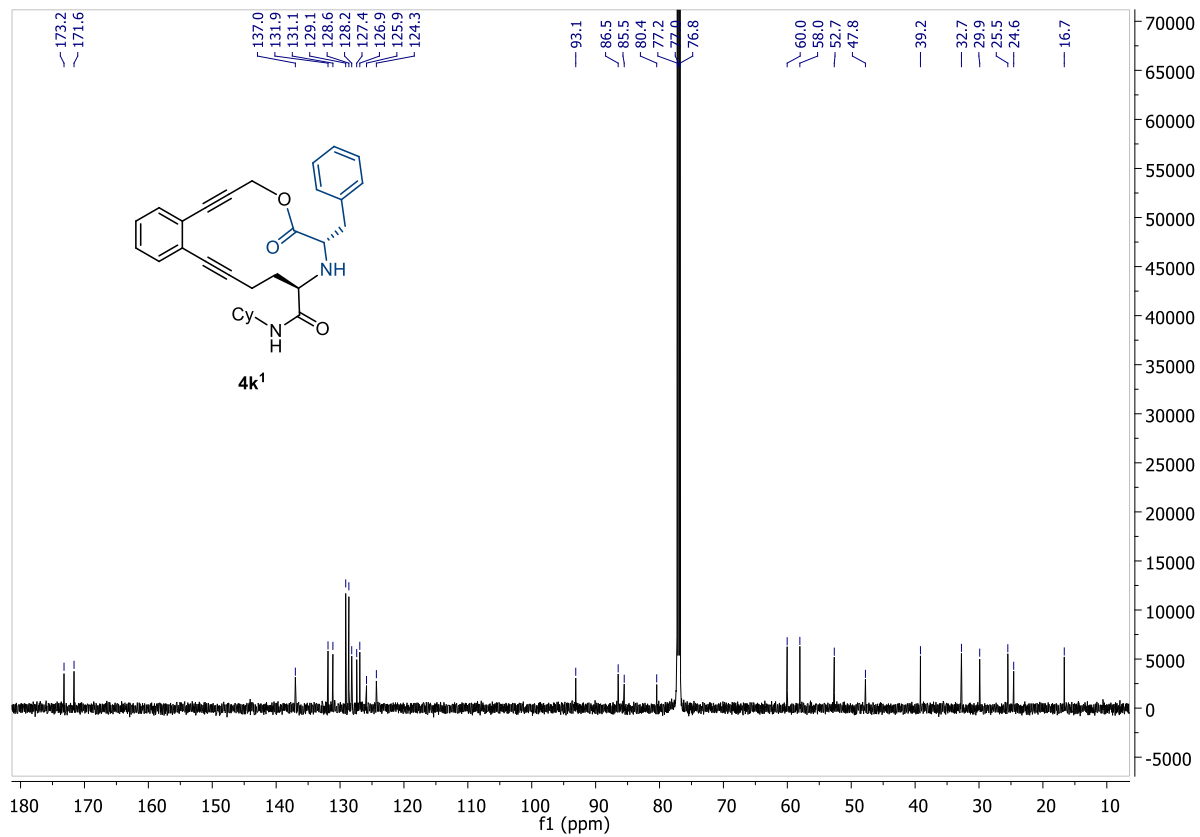

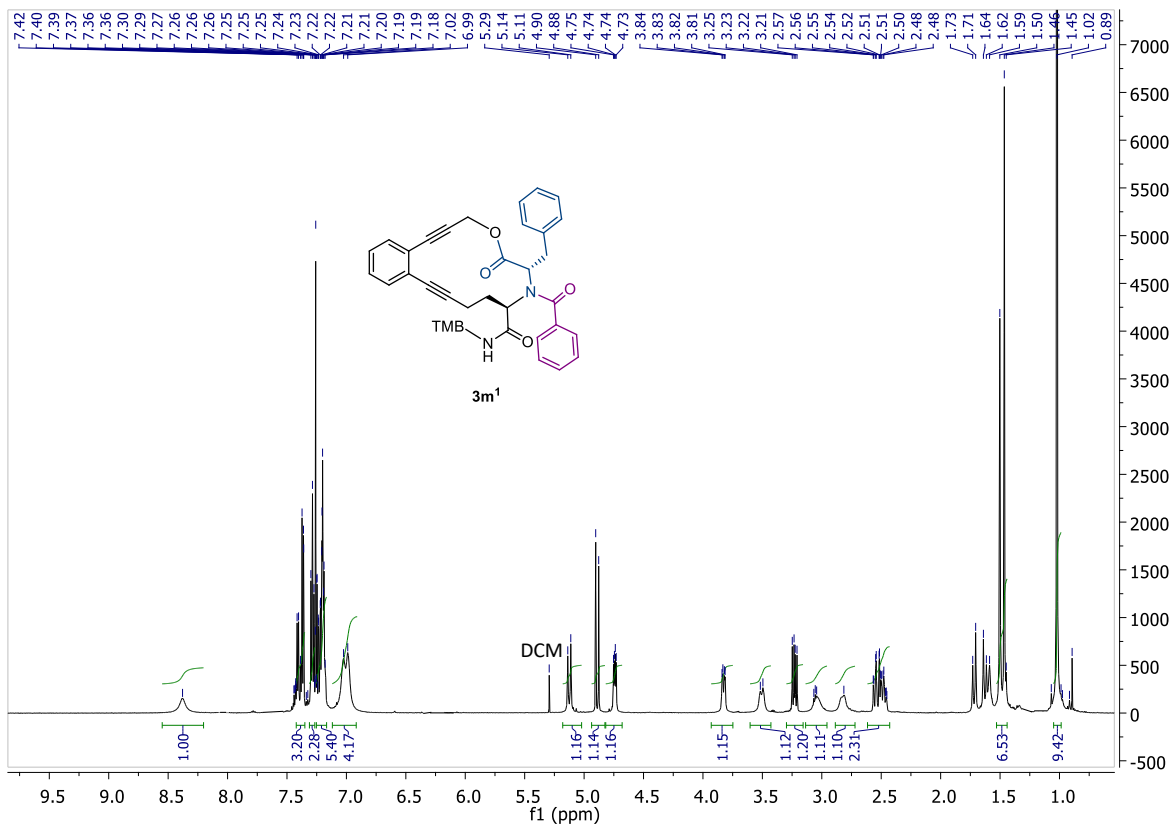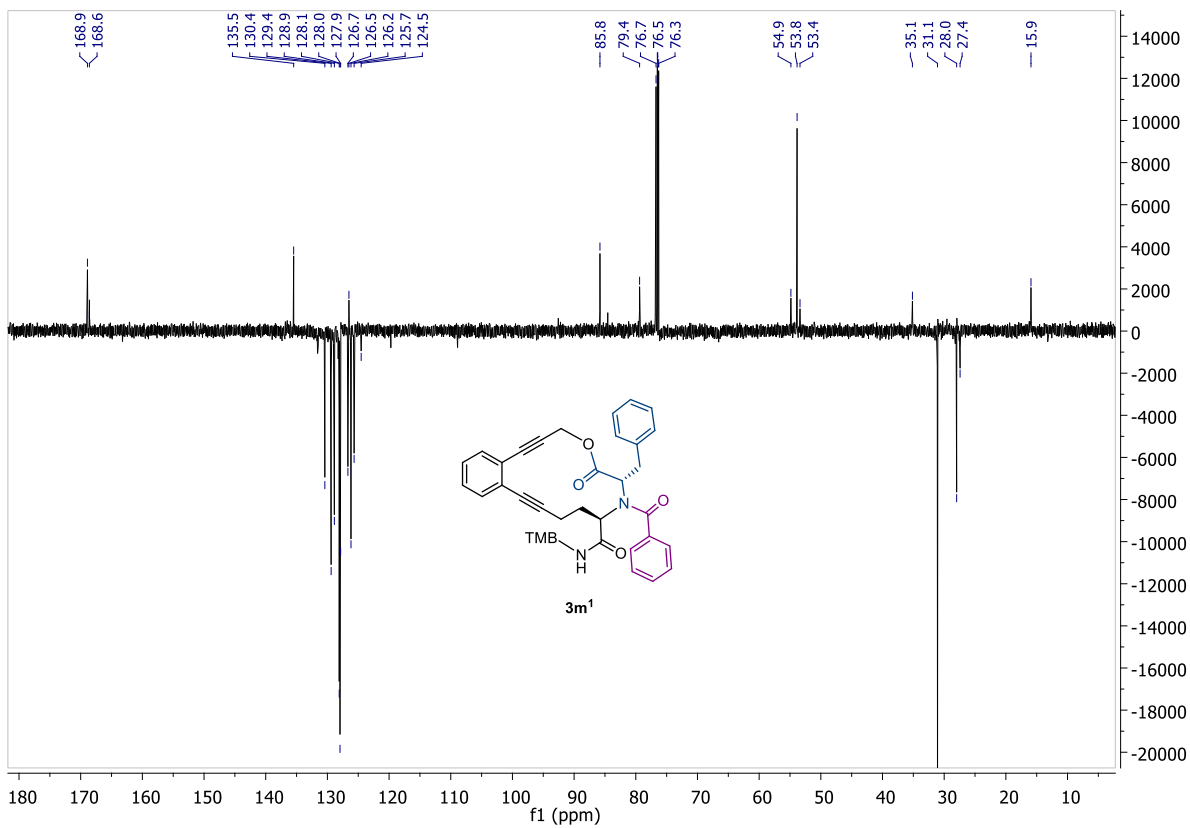

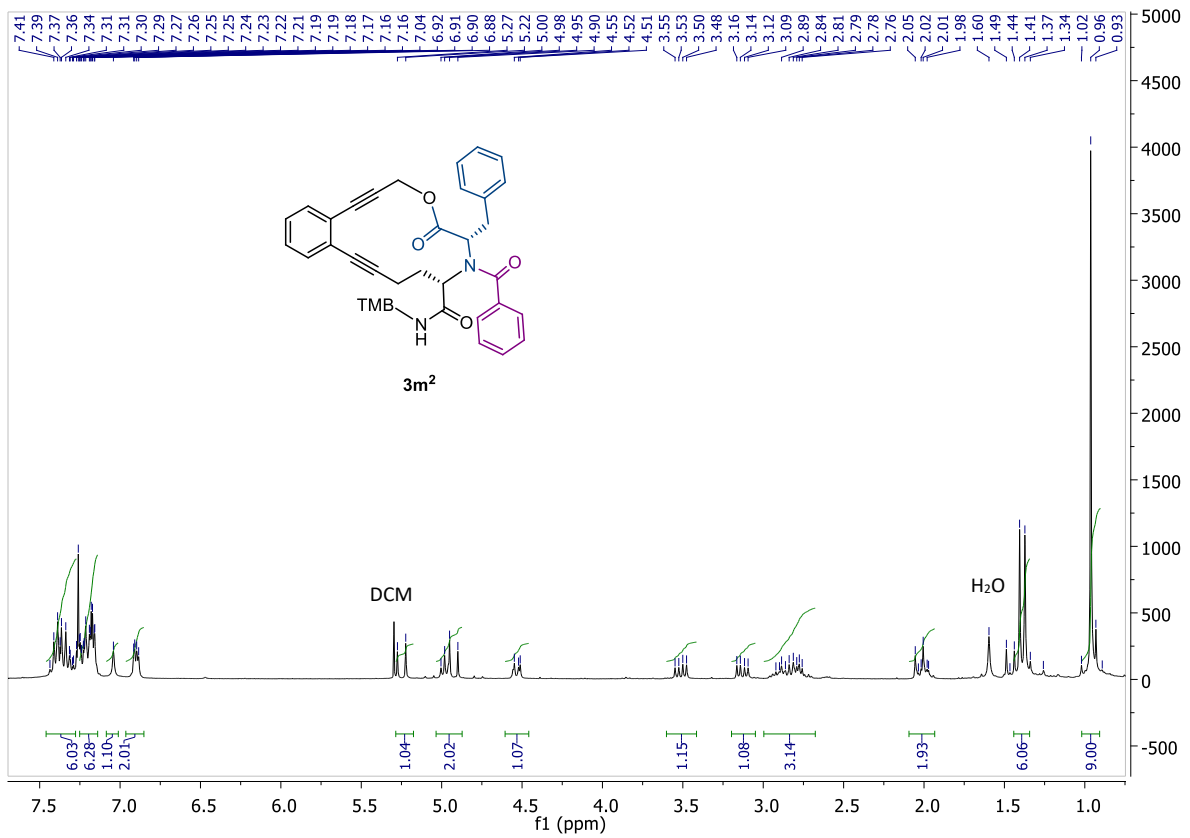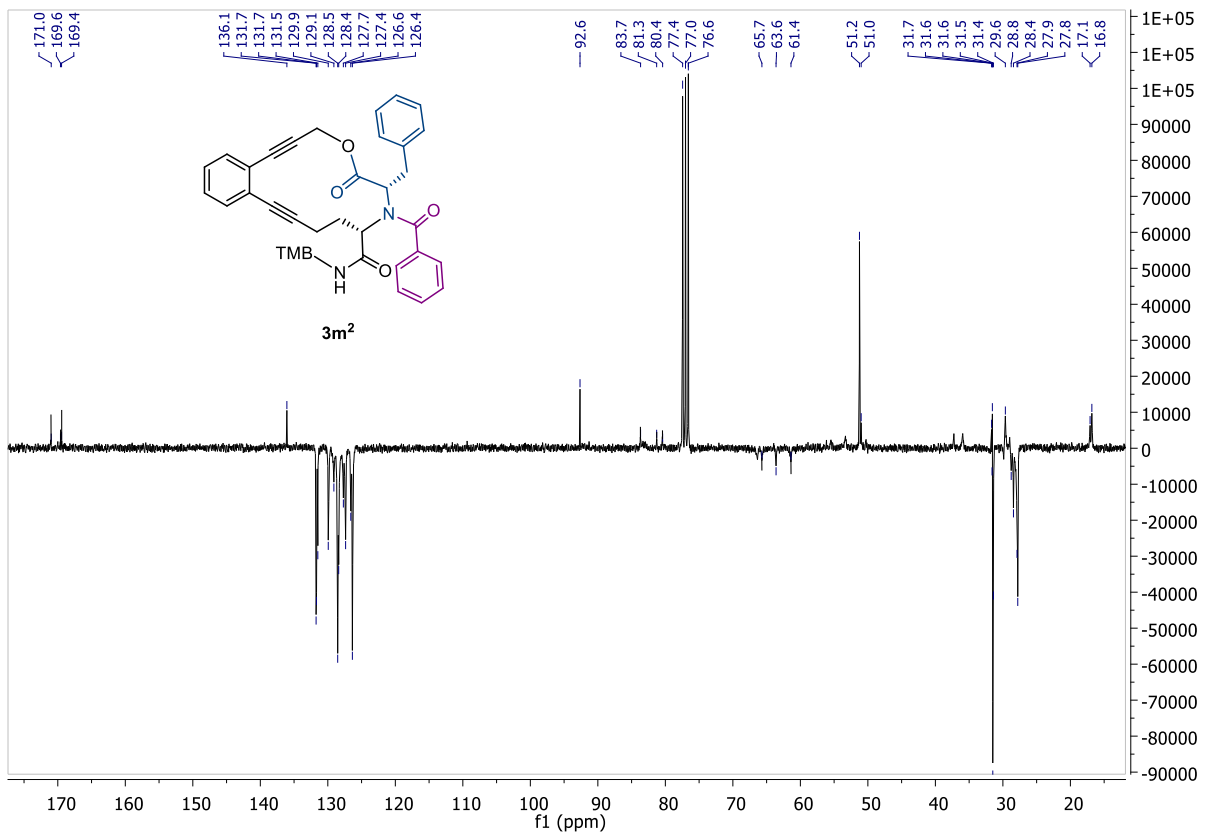



Macrocycle **3n** is isolated as a mixture of diastereoisomers

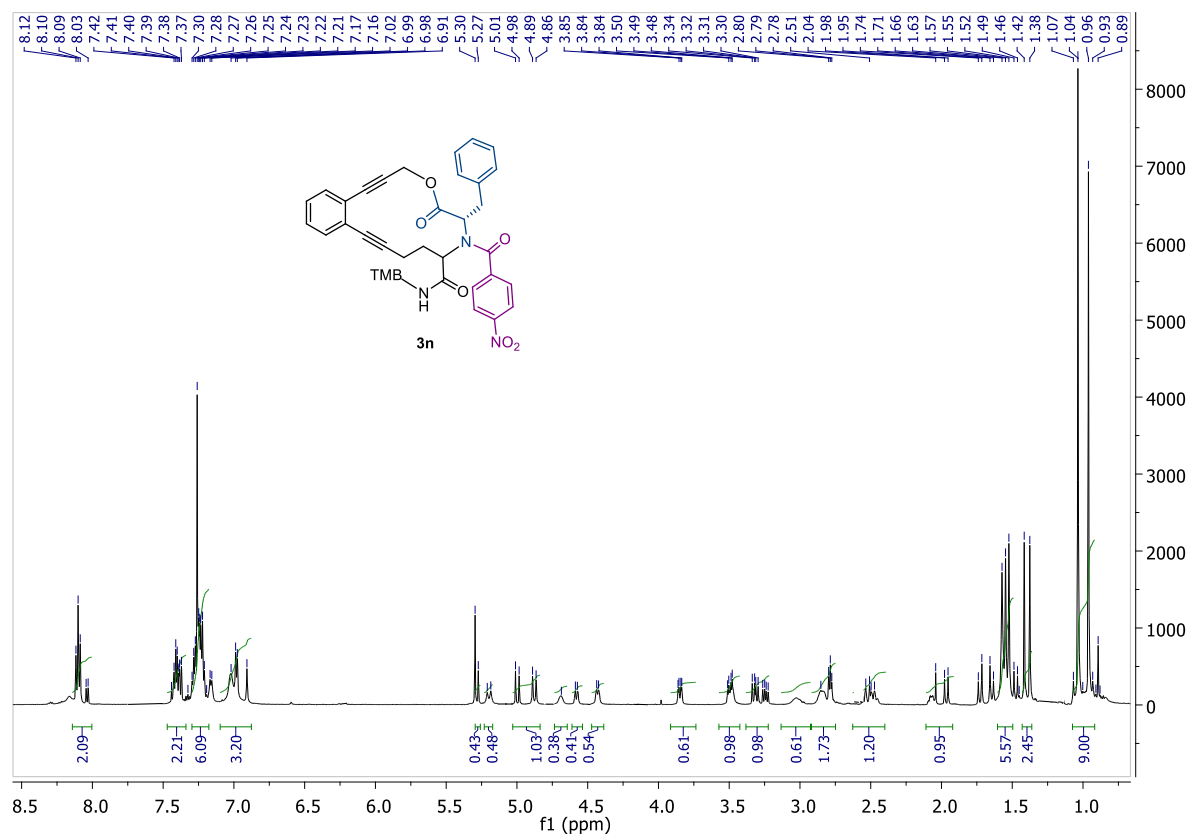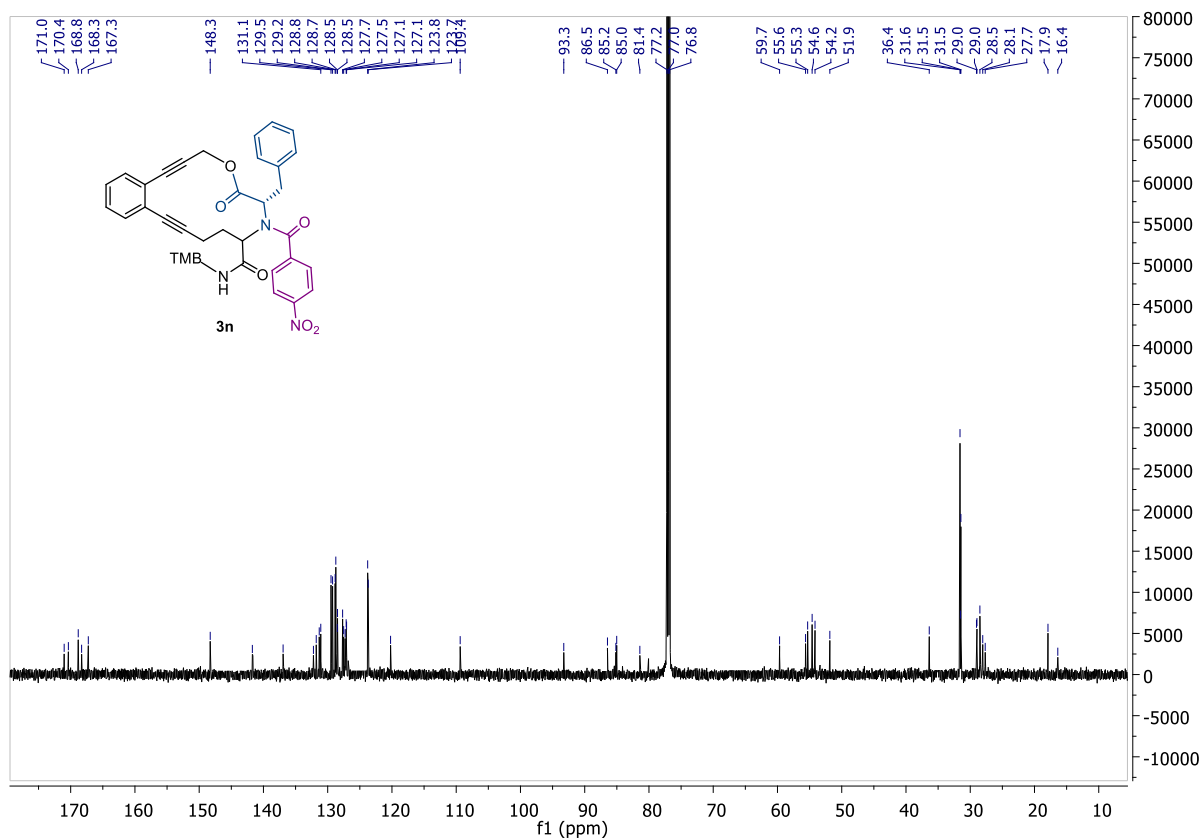

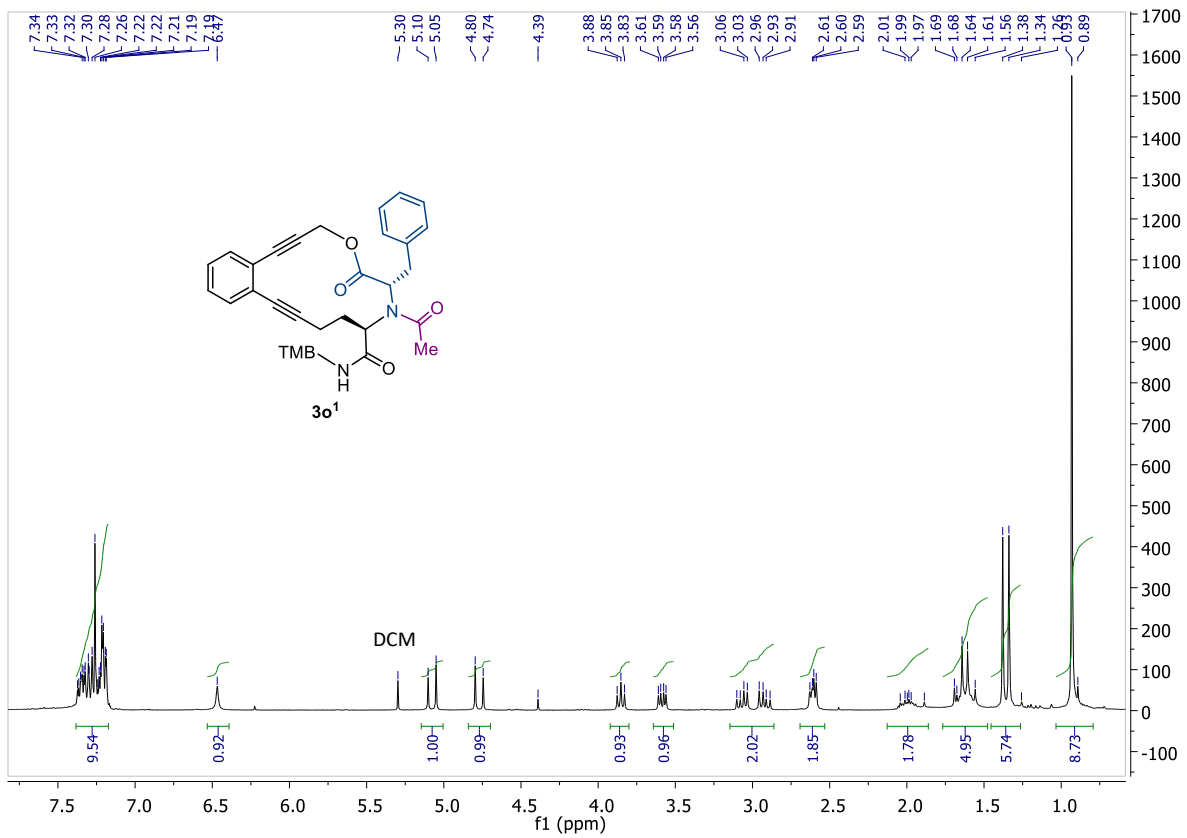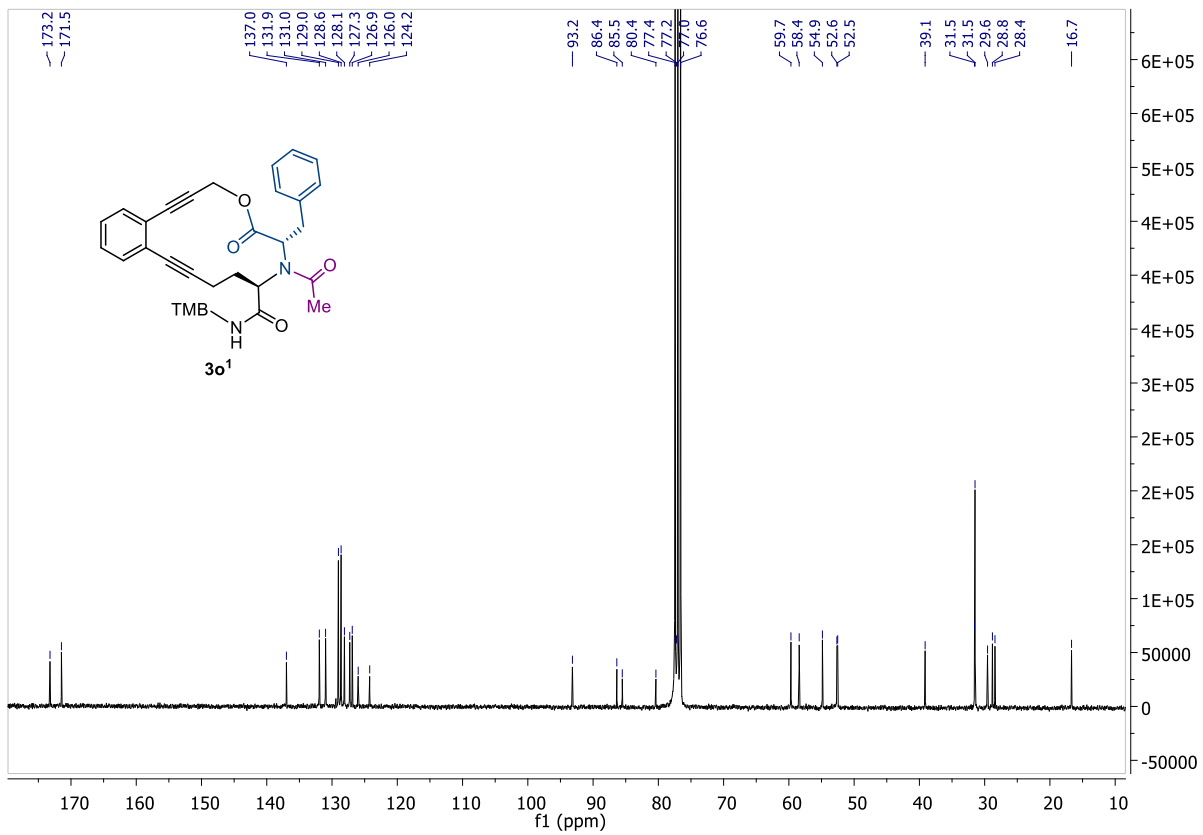

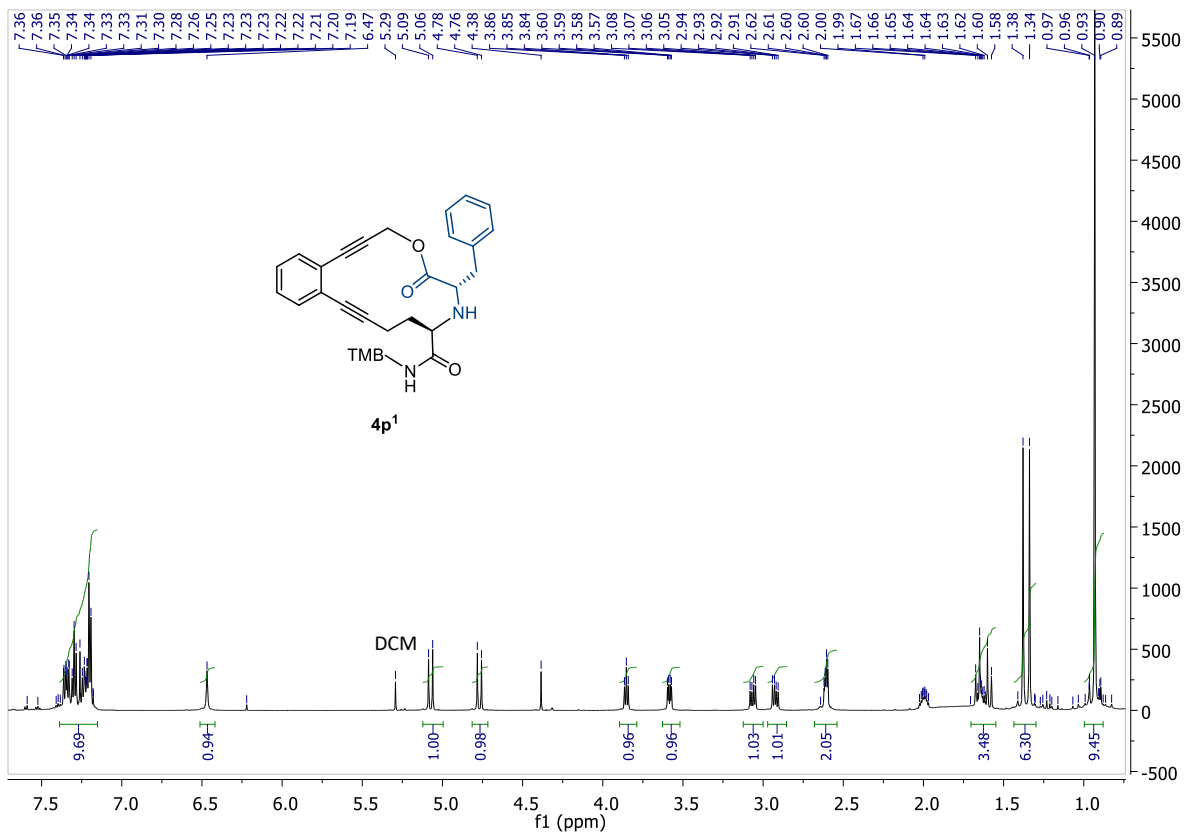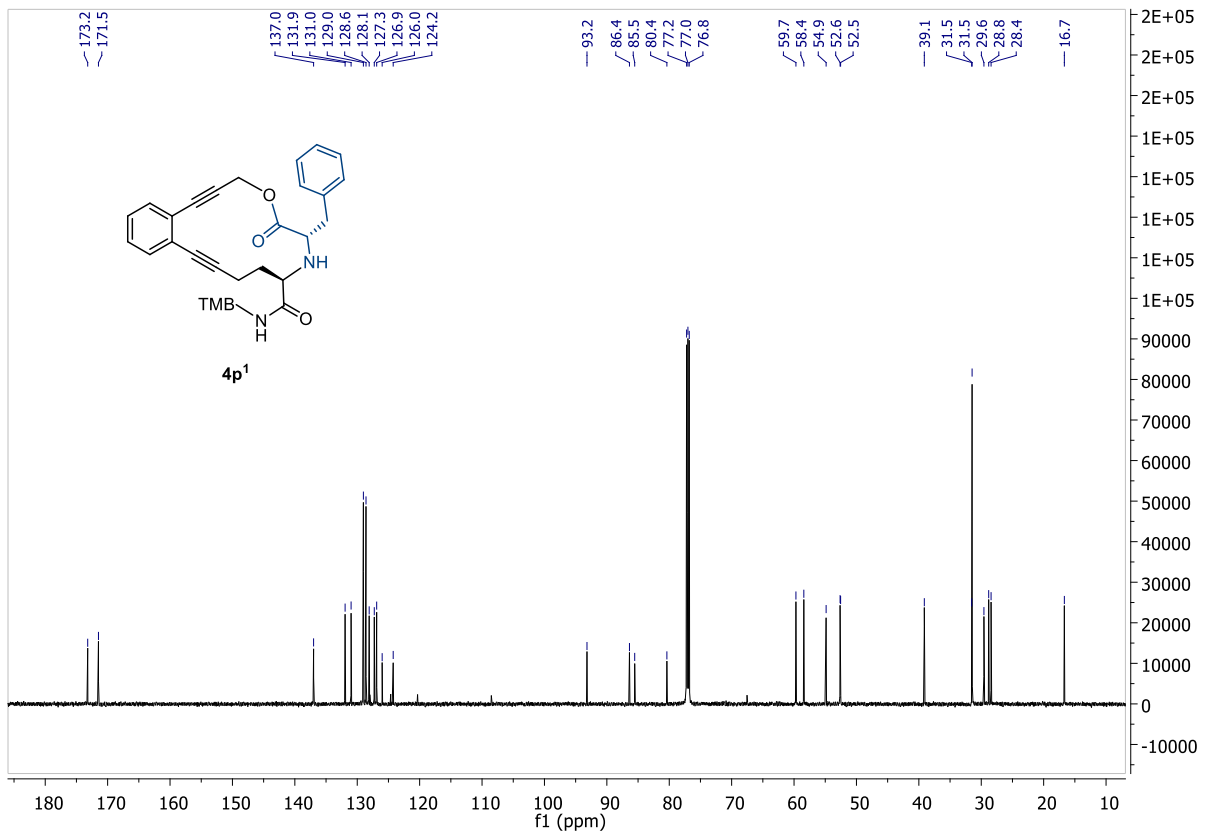

## 8. X-RAY DATA

Single crystals of compounds **3m**<sup>1</sup> and **4p**<sup>1</sup> were obtained by slow evaporation (at room temperature) of solutions (3 mg dissolved in 200  $\mu$ L ethyl acetate).

The data on single crystals of compounds **3m**<sup>1</sup> and **4p**<sup>1</sup> were collected on a Xcalibur Nova single crystal diffractometer equipped with Ruby CCD detector, using Cu K $\alpha$  X-ray radiation with wavelength of  $\lambda=1.5412$  Å. The crystals were kept at room temperature during data collection. Using Olex2,<sup>2</sup> the structures were solved with the ShelXT<sup>3</sup> structure solution program using Intrinsic Phasing and refined with the ShelXL refinement package using Least Squares minimisation.

### Crystal structure determination of **3m**<sup>1</sup>

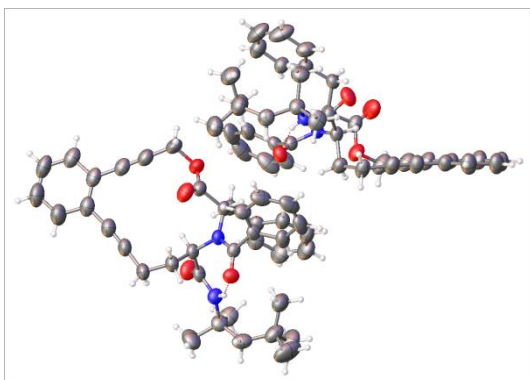

**Crystal Data for 3m**<sup>1</sup>: chemical formula C<sub>39</sub>H<sub>42</sub>N<sub>2</sub>O<sub>4</sub> (M=602.74 g/mol): triclinic, space group *P* 1,  $a = 11.4922(4)$  Å,  $b = 11.9793(4)$  Å,  $c = 12.3100(4)$  Å,  $\alpha = 91.779(2)^\circ$ ,  $\beta = 96.053(3)^\circ$ ,  $\gamma = 91.867(3)^\circ$ ,  $V = 1683.34(10)$  Å<sup>3</sup>,  $Z = 2$ ,  $T = 293(2)$  K,  $\mu(\text{CuK}\alpha) = 0.605$  mm<sup>-1</sup>,  $D_{\text{calc}} = 1.189$  g cm<sup>-3</sup>, 33048 reflections measured ( $7.388^\circ \leq 2\theta \leq 151.972^\circ$ ), 12807 unique ( $R_{\text{int}} = 0.0569$ ,  $R_{\text{sigma}} = 0.0598$ ) which were used in all calculations. The final  $R_1$  was 0.0749 ( $I > 2\sigma(I)$ ) and  $wR_2$

was 0.2190 (all data). **Structure is deposited in the CCDC, Deposition Number 1967883.**

### Crystal structure determination of **4p**<sup>1</sup>

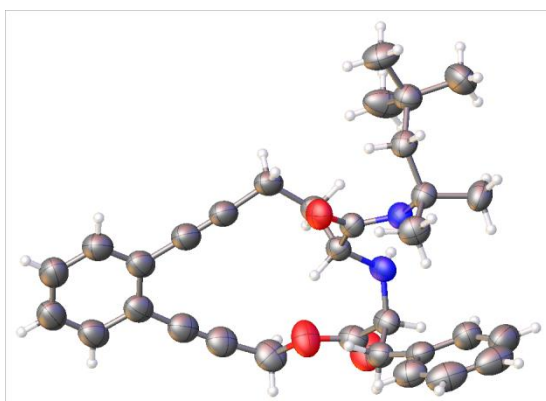

**Crystal Data for 6q**: chemical formula C<sub>32</sub>H<sub>38</sub>N<sub>2</sub>O<sub>3</sub> (M = 498.64 g/mol): orthorhombic, space group *P* 2<sub>1</sub> 2<sub>1</sub> 2<sub>1</sub> (no. 19),  $a = 5.8525(2)$  Å,  $b = 13.9095(4)$  Å,  $c = 34.5620(8)$  Å,  $V = 2813.53(14)$  Å<sup>3</sup>,  $Z = 4$ ,  $T = 293(2)$  K,  $\mu(\text{CuK}\alpha) = 0.591$  mm<sup>-1</sup>,  $D_{\text{calc}} = 1.177$  g cm<sup>-3</sup>, 13625 reflections measured ( $6.85^\circ \leq 2\theta \leq 151.968^\circ$ ), 5803 unique ( $R_{\text{int}} = 0.0404$ ,  $R_{\text{sigma}} = 0.0503$ ) which were used in all calculations. The final  $R_1$  was 0.0468 ( $I > 2\sigma(I)$ ) and  $wR_2$  was 0.1166 (all data).

**Structure is deposited in the CCDC, Deposition Number 1967885.**

<sup>1</sup> (a) Mossman, T. Rapid colorimetric assay for cellular growth and survival: Application to proliferation and cytotoxicity assays. *J Immunol Meth* **1983**, *65*, 55-63. (b) Boyd MR, Kenneth DP. Some practical considerations and applications of the National Cancer Institute in vitro anticancer drug discovery screen. *Drug Dev Res* **1995**, *34*:91-109. (c) [www.dtp.nci.nih.gov](http://www.dtp.nci.nih.gov)

---

<sup>2</sup> Dolomanov, O.V., Bourhis, L.J., Gildea, R.J, Howard, J.A.K. & Puschmann, H. (2009), *J. Appl. Cryst.* 42, 339-341.

<sup>3</sup> Sheldrick, G.M. (2015). *Acta Cryst. A* 71, 3-8.
